# Supplementary material for: Socioeconomic disparities and sexual dimorphism in neurotoxic effects of ambient fine particles on youth IQ: A longitudinal analysis
Source: PLoS One. 2017 Dec 5;12(12):e0188731. doi: 10.1371/journal.pone.0188731 (PMC5716576; doi:10.1371/journal.pone.0188731)
Supplement: S1 Data — (XLS) [file pone.0188731.s001.xls]

## Sheet: PLOSONE
twin	yrace	age	PM25_1y	Total_NOx_Annual	VIQ	PIQ	NDVI1000m_1y	nSES2000_sum	TrafDens300m	temp_m	rh_m	nebase	mh_smk	pwood1	pwood9	pstrs	seslow	adol	male	ID
1	1	10.7871	2.23758	1.6209	125	125	4.19672	97391	6.02	17.3621	56.1877	21	0			37	0	1	0	76
2	1	10.7871	2.23758	1.6209	119	124	4.19672	97391	6.02	17.4281	56.3636	21	0			37	0	1	0	76
1	1	21.8261	1.61412	14.4229	129	121	3.73884	58965	69.29	17.9606	61.8387	24	0	75	29	23	0	0	1	121
1	1	9.95756	2.65119	29.9133	123	111	3.92121	58965	64.4	17.9606	61.8387	24	0	75	29	23	0	1	1	121
2	1	22.2888	1.72743	14.4229	113	120	3.69294	58965	69.29	17.9606	61.8387	24	0	75	29	23	0	0	1	121
2	1	9.95756	2.65119	29.9133	127	126	3.92121	58965	64.4	17.9606	61.8387	24	0	75	29	23	0	1	1	121
1	7	21.4456	1.38367	6.0294	124	124	3.70745	100891	9.96	16.8642	49.1208	28	1	76	31	39	0	0	0	427
1	7	9.93018	2.44754	35.5883	106	116	2.80797	50663.7	33.33	16.8642	49.1208	28	1	76	31	39	0	1	0	427
2	7	21.4483	1.38367	6.0294	128	120	3.70745	100891	9.96	16.8642	49.1208	28	1	76	31	39	0	0	0	427
2	7	9.93018	2.44754	35.5883	139	127	2.80797	50663.7	33.33	16.8642	49.1208	28	1	76	31	39	0	1	0	427
1	3	22.5243	1.87676	13.0299	104	111	2.57031	46311.9	10.02	17.8736	61.2511	20	0			28	0	0	1	472
1	3	10.1164	2.81598	30.8453	96	120	2.7104	46311.9	9.31	17.8736	61.2511	20	0			28	0	1	1	472
2	3	10.1164	2.81598	30.8453	108	144	2.7104	46311.9	9.31	17.8736	61.2511	20	0			28	0	1	0	472
1	3	9.87817	2.5985	43.7957	101	93	2.49192	66145.8	50.04	17.5025	65.4546	30	1			28	0	1	1	506
2	3	9.87817	2.5985	43.7957	101	91	2.49192	66145.8	50.04	17.5025	65.4546	30	1			28	0	1	1	506
1	3	9.93018	2.87031	30.1339	76	81	1.85812	24279.2	81.07	17.8483	55.88	28	0	47	10	35	1	1	0	359
2	3	9.93018	2.87031	30.1339	65	97	1.85812	24279.2	81.07	17.8483	55.88	28	0	47	10	35	1	1	0	359
1	1	9.90828	2.28202	10.5782	81	69	4.21642	119057	26.66	18.0404	54.3033	17	0	71	24	33	0	1	1	530
2	1	9.90828	2.28202	10.5782	76	62	4.21642	119057	26.66	18.0404	54.3033	17	0	71	24	33	0	1	0	530
1	7	9.92197	2.07105	2.14105	104	125	4.18249	97391	13.16	17.5667	56.3019	33	0			26	0	1	1	315
2	7	9.92197	2.07105	2.14105	123	132	4.18249	97391	13.16	17.5667	56.3019	33	0			26	0	1	1	315
1	7	10.0999	2.22769	2.3787	111	126	3.6608	72917.6	13.1	17.885	52.8175	27	0			24	0	1	0	749
2	7	10.0999	2.22769	2.3787	109	128	3.6608	72917.6	13.1	17.885	52.8175	27	0			24	0	1	0	749
1	7	9.97947	2.74712	23.1628	69	86	2.99713	42996.5	53.88	18.1181	58.1635	23	0			35.5	0	1	0	191
1	7	21.1773	1.66502	9.75525	78	91	2.72244	42996.5	57.96	18.1181	58.1635	23	0			35.5	0	0	0	191
2	7	21.6893	1.57745	9.75525	95	78	2.69891	42996.5	57.96	18.1181	58.1635	23	0			35.5	0	0	0	191
2	7	9.97947	2.74712	23.1628	67	80	2.99713	42996.5	53.88	18.1181	58.1635	23	0			35.5	0	1	0	191
1	2	9.65914	2.50631	27.226	110	97	3.0939	47482.4	62.1	17.5467	65.5583	19	0			33	1	1	1	556
2	2	9.65914	2.50631	27.226	105	118	3.0939	47482.4	62.1	17.5467	65.5583	19	0			33	1	1	0	556
1	3	22.7269	1.99054	22.9208	88	98	2.29884	34283.6	76.28	17.4292	57.5492	22	1			25	1	0	1	410
1	3	9.68652	2.75301	51.7597	73	97	2.89466	34283.6	76.9	17.4292	57.5492	22	1			25	1	1	1	410
2	3	22.7296	1.99054	22.9208	75	81	2.29884	34283.6	76.28	17.4292	57.5492	22	1			25	1	0	1	410
2	3	9.68652	2.75301	51.7597	88	84	2.89466	34283.6	76.9	17.4292	57.5492	22	1			25	1	1	1	410
1	7	9.94935	2.3764	37.1977	139	119	2.70861	36717.3	89.25	16.2042	50.4425	26	0			42	1	1	0	958
2	7	9.94935	2.3764	37.1977	136	128	2.70861	36717.3	89.25	16.5478	48.6741	26	0			42	1	1	0	958
1	7	21.1362	1.34467	5.7942	113	113	3.45961	67857.5	51.51	17.6572	55.4411						0	0	1	217
2	7	20.1342	1.34467	5.7942	104	84	3.45961	67857.5	51.51	17.5623	54.699						0	0	1	217
1	3	9.81793	2.80824	27.4859	103	87	2.81299	38894.9	69.26	16.8908	61.875	35	0			29	1	1	0	89
2	3	9.81793	2.80824	27.4859	97	97	2.81299	38894.9	69.26	16.8908	61.875	35	0			29	1	1	0	89
1	4	9.75496	0.310263	13.05	105	107	3.46585	50714	102.13	17.055	66.3608	22	0			34	0	1	0	230
1	4	21.5414	1.62098	8.86115	118	104	2.4641	36736	66.5	17.055	66.3608	22	0			34	0	0	0	230
2	4	9.75496	0.310263	13.05	95	93	3.46585	50714	102.13	17.055	66.3608	22	0			34	0	1	0	230
2	4	21.5414	1.62098	8.86115	111	112	2.4641	36736	66.5	17.055	66.3608	22	0			34	0	0	0	230
1	7	10.1081	2.28307	13.3429	93	98	3.82248	92921.4	9.18	17.6425	53.5194	22	0			19	0	1	1	54
2	7	10.1081	2.28307	13.3429	85	89	3.82248	92921.4	9.18	17.6425	53.5194	22	0			19	0	1	1	54
1	1	9.50582	2.37336	29.5423	105	123	3.07534	37843.9	140.66	17.0746	58.9125	32	0			34.5	0	1	1	752
1	1	21.9357	1.91565	13.0342	100	123	2.70542	52005.5	113.45	17.0746	58.9125	32	0			34.5	0	0	1	752
2	1	9.50582	2.37336	29.5423	125	96	3.07534	37843.9	140.66	17.0746	58.9125	32	0			34.5	0	1	1	752
2	1	22.4668	2.01824	13.0342	122	117	2.66557	52005.5	113.45	17.0746	58.9125	32	0			34.5	0	0	1	752
1	7	9.70842	2.97925	23.0473	112	107	3.15388	39663.2	53.52	17.55	55.8358	54	0			34	0	1	0	772
2	7	9.70842	2.97925	23.0473	114	92	3.15388	39663.2	53.52	17.55	55.8358	54	0			34	0	1	0	772
1	2	9.51403	2.82205	13.3571	86	107	3.22621	36362.8	11.34	18.0844	58.7489	22	0	65	26	32.5	1	1	0	450
2	2	9.51403	2.82205	13.3571	87	91	3.22621	36362.8	11.34	18.0844	58.7489	22	0	65	26	32.5	1	1	0	450
1	3	20.6927	1.79686	8.491	70	42	2.64513	32197.8	127.99	16.6602	66.6896	32	1			27.5	1	0	1	29
1	3	9.68378	2.88484	19.5981	45	55	2.83049	32197.8	118.96	16.6602	66.6896	32	1			27.5	1	1	1	29
2	3	9.68378	2.88484	19.5981	89	69	2.83049	32197.8	118.96	16.6602	66.6896	32	1			27.5	1	1	1	29
2	3	20.6982	1.79686	8.491	50	63	2.64513	32197.8	127.99	16.6602	66.6896	32	1			27.5	1	0	1	29
1	1	9.32786	2.30463	10.8163	111	90	3.54745	56888.3	60.87	17.5317	67.8694	34	0	70	27	25.5	0	1	0	164
2	1	9.32786	2.30463	10.8163	104	121	3.54745	56888.3	60.87	17.5317	67.8694	34	0	70	27	25.5	0	1	0	164
1	3	9.46201	2.37755	15.512	86	83	3.107	56903.5	4.89	15.6675	46.4633	40	1	72	28	31.5	1	1	1	464
2	3	9.46201	2.37755	15.512	91	72	3.107	56903.5	4.89	15.6675	46.4633	40	1	72	28	31.5	1	1	0	464
1	2	9.47296	2.25233	30.9385	121	108	2.5144	40604.1	141.97	17.2825	60.2275	38	0			34	0	1	1	433
2	2	9.47296	2.25233	30.9385	137	103	2.5144	40604.1	141.97	17.2825	60.2275	38	0			34	0	1	0	433
1	2	9.31964	2.38868	19.0399	99	88	3.36227	37843.9	47.56	17.5071	63.7525	18	0			36	1	1	1	408
2	2	9.31964	2.38868	19.0399	99	92	3.36227	37843.9	47.56	17.5071	63.7525	18	0			36	1	1	1	408
1	2	9.21834	2.40435	38.6427	106	106	3.54863	45365.5	67.11	17.1011	56.1839	22	0	72	27	30.5	0	1	1	940
2	2	9.21834	2.40435	38.6427	133	123	3.54863	45365.5	67.11	17.1011	56.1839	22	0	72	27	30.5	0	1	0	940
1	1	9.25394	2.3598	18.628	150	134	3.86309	100812	9.18	16.4046	50.7933	23	0	75	30	30	0	1	0	259
2	1	9.25394	2.3598	18.628	144	114	3.86309	100812	9.18	16.3473	51.2512	23	0	75	30	30	0	1	0	259
1	7	10.2204	2.54782	114.412	108	115	3.26873	58253.1	657.83	16.69	51.6403	32	1	44		25	1	1	0	713
1	7	21.8617	1.50219	65.424	96	116	2.90798	58253.1	665.82	16.69	51.6403	32	1	44		25	1	0	0	713
2	7	21.8426	1.50219	65.424	114	116	2.90798	58253.1	665.82	16.69	51.6403	32	1	44		25	1	0	0	713
2	7	10.2204	2.54782	114.412	111	116	3.26873	58253.1	657.83	16.69	51.6403	32	1	44		25	1	1	0	713
1	1	9.30869	2.72138	31.2334	124	100	3.55626	45023.6	60.8	17.2508	65.8092	25	0			36	0	1	1	42
2	1	9.30869	2.72138	31.2334	138	112	3.55626	45023.6	60.8	17.2508	65.8092	25	0			36	0	1	0	42
1	3	10.0945	2.59974	19.1118	88	110	2.38023	31029.8	7.81	17.085	66.1625	18	0			30	1	1	1	744
2	3	10.0945	2.59974	19.1118	98	93	2.38023	31029.8	7.81	17.085	66.1625	18	0			30	1	1	0	744
1	3	19.7372	2.03067	11.7378	98	74	1.92009	22510.9	28.65	18.0842	58.3428	44	0			15	1	0	1	64
1	3	9.80972	2.92699	26.2588	97	84	2.2818	22510.9	26.62	18.0842	58.3428	44	0			15	1	1	1	64
2	3	21.8836	1.86221	11.7378	100	74	2.02401	22510.9	28.65	18.0842	58.3428	44	0			15	1	0	1	64
2	3	9.80972	2.92699	26.2588	99	65	2.2818	22510.9	26.62	18.0842	58.3428	44	0			15	1	1	1	64
1	2	9.49213	2.88913	28.5663	95	87	3.30329	44377.9	12.32	18.0235	63.1617	19	0	72	29	37.5	1	1	1	536
2	2	9.49213	2.88913	28.5663	98	84	3.30329	44377.9	12.32	18.0235	63.1617	19	0	72	29	37.5	1	1	0	536
1	1	9.38261	2.48495	51.3474	118	124	3.93295	78882.2	110.34	17.0042	66.1942	22	0			34	0	1	1	176
2	1	9.38261	2.48495	51.3474	105	109	3.93295	78882.2	110.34	17.5858	61.8787	22	0			34	0	1	0	176
1	1	9.18001	2.83171	30.7411	111	103	2.96088	45709.6	94.12	17.405	60.97	26	0			43	0	1	1	359
2	1	9.18001	2.83171	30.7411	108	106	2.96088	45709.6	94.12	17.405	60.97	26	0			43	0	1	0	359
1	2	9.86995	2.9275	55.9023	86	91	2.76326	32362.6	51.74	17.7871	60.5433	64	0			30	1	1	1	837
2	2	9.86995	2.9275	55.9023	81	115	2.76326	32362.6	51.74	17.7871	60.5433	64	0			30	1	1	1	837
1	1	9.21013	2.80781	14.1049	119	107	4.63999	200182	79.2	18.0294	61.7481	29	0			50	0	1	0	224
1	1	21.8042	1.88577	5.74765	126	117	4.40953	200182	85.21	18.0294	61.7481	29	0			50	0	0	0	224
2	1	21.7769	1.88577	5.74765	129	111	4.40953	200182	85.21	18.0294	61.7481	29	0			50	0	0	0	224
2	1	9.21013	2.80781	14.1049	105	105	4.63999	200182	79.2	18.0294	61.7481	29	0			50	0	1	0	224
1	1	9.11431	2.87362	20.5404	96	126	2.87005	46965.2	8.88	17.6892	62.6411	34	1			37	0	1	1	683
2	1	22.0424	2.0166	8.4332	122	116	2.48544	46965.2	29.74	17.6892	62.6411	34	1			37	0	0	0	683
2	1	9.11431	2.87362	20.5404	99	92	2.87005	46965.2	8.88	17.6892	62.6411	34	1			37	0	1	0	683
1	1	9.27584	2.77004	38.9432	113	118	3.21103	45754.7	177.35	17.0717	63.8817	38	0			48	0	1	1	162
2	1	9.27584	2.77004	38.9432	110	113	3.21103	45754.7	177.35	17.0717	63.8817	38	0			48	0	1	0	162
1	2	9.16632	2.86209	50.7679	75	76	2.8186	23986.9	63.2	17.7587	63.4473	19	0			24	1	1	1	783
2	2	9.16632	2.86209	50.7679	73	81	2.8186	23986.9	63.2	17.7587	63.4473	19	0			24	1	1	1	783
2	2	21.7166	1.92024	21.8241	84	89	2.37552	23986.9	68	17.7587	63.4473	19	0			24	1	0	1	783
1	7	9.11704	2.73663	26.3961	101	102	2.81279	40202.7	65.41	16.7306	67.9319	28	0			30.5	0	1	1	564
2	7	20.9582	1.68494	11.3041	104	118	2.65025	40202.7	70.38	16.7306	67.9319	28	0			30.5	0	0	1	564
2	7	9.11704	2.73663	26.3961	121	124	2.81279	40202.7	65.41	16.7306	67.9319	28	0			30.5	0	1	1	564
1	7	9.13621	2.89961	12.8737	52	99	3.09359	33242.2	103.24	17.6088	64.4408	17	0			28	1	1	1	101
2	7	9.13621	2.89961	12.8737	84	85	3.09359	33242.2	103.24	17.6088	64.4408	17	0			28	1	1	0	101
1	1	9.70568	2.74453	20.9747	144	128	3.93381	46557.5	86.98	18.0742	60.8875	24	0			31	0	1	1	763
2	1	21.3142	1.59262	9.916	134	124	3.6507	46557.5	93.59	18.0742	60.8875	24	0			31	0	0	0	763
2	1	9.70568	2.74453	20.9747	136	126	3.93381	46557.5	86.98	18.0742	60.8875	24	0			31	0	1	0	763
1	1	9.41547	2.22966	17.9136	111	109	3.46577	93607.9	9.62	16.92	59.7846	29	0			33	0	1	0	194
2	1	9.41547	2.22966	17.9136	88	91	3.46577	93607.9	9.62	16.92	59.7846	29	0			33	0	1	0	194
1	3	20.4682	1.80666	14.965	101	117	2.0337	30833.3	57.8	16.5744	68.1673	24	0	70	26	24	0	0	1	113
1	3	9.68104	2.88533	33.9748	113	93	2.43262	30833.3	53.74	16.5744	68.1673	24	0	70	26	24	0	1	1	113
2	3	9.68104	2.88533	33.9748	114	98	2.43262	30833.3	53.74	16.5744	68.1673	24	0	70	26	24	0	1	1	113
1	1	20.4326	1.37055	4.81565	84	89	3.34474	50781.7	12.38	15.3204	45.8517	19	1	65	17	40	1	0	1	218
1	1	9.45927	2.4059	10.1081	74	97	3.90739	50781.7	11.5	15.3204	45.8517	19	1	65	17	40	1	1	1	218
2	1	20.4189	1.37055	4.81565	89	84	3.34474	50781.7	12.38	15.3204	45.8517	19	1	65	17	40	1	0	0	218
2	1	9.45927	2.4059	10.1081	87	72	3.90739	50781.7	11.5	15.3204	45.8517	19	1	65	17	40	1	1	0	218
1	7	20.397	1.61555	9.1525	112	96	2.99194	38637.1	122.41	18.2754	60.5375	22	0			21	0	0	1	648
1	7	9.18275	2.70146	20.9717	120	108	3.43228	38637.1	113.78	18.2754	60.5375	22	0			21	0	1	1	648
2	7	9.18275	2.70146	20.9717	93	101	3.43228	38637.1	113.78	18.2754	60.5375	22	0			21	0	1	1	648
2	7	20.4052	1.61555	9.1525	85	84	2.99194	38637.1	122.41	18.2754	60.5375	22	0			21	0	0	1	648
1	4	9.05133	2.16219	3.70295	111	132	3.73726	76075.3	49.53	17.4992	59.4494	20	0			31	0	1	1	231
2	4	9.05133	2.16219	3.70295	107	138	3.73726	76075.3	49.53	17.4992	59.4494	20	0			31	0	1	1	231
1	2	9.03765	2.38299	63.2651	101	96	2.97803	53837.2	31.56	17.0054	50.231	41	0	67	25	34	0	1	1	583
2	2	9.03765	2.38299	63.2651	85	92	2.97803	53837.2	31.56	17.0054	50.231	41	0	67	25	34	0	1	0	583
1	2	9.2512	2.9416	32.7116	89	125	2.7198	33831.1	111.43	17.0558	68.1642	41	0			48	0	1	1	828
2	2	9.2512	2.9416	32.7116	89	131	2.7198	33831.1	111.43	17.0558	68.1642	41	0			48	0	1	1	828
1	1	9.1499	2.69576	34.8725	116	103	3.31657	28809.2	9.16	17.7138	62.4163	23	0	76	30	28	0	1	0	940
2	1	9.1499	2.69576	34.8725	111	105	3.31657	28809.2	9.16	17.7138	62.4163	23	0	76	30	28	0	1	0	940
1	2	20.6982	1.80144	16.0233	101	124	2.44298	34104.5	32.29	18.25	58.6819	24	0	58	27	25	1	0	0	779
1	2	9.57153	2.93338	35.9588	119	121	2.70324	34104.5	30.01	18.25	58.6819	24	0	58	27	25	1	1	0	779
2	2	20.6872	1.80144	16.0233	107	113	2.44298	34104.5	32.29	18.25	58.6819	24	0	58	27	25	1	0	0	779
2	2	9.57153	2.93338	35.9588	91	115	2.70324	34104.5	30.01	18.25	58.6819	24	0	58	27	25	1	1	0	779
1	7	9.50856	3.00558	53.7844	119	112	1.66387	22327.6	126.92	18.3583	56.7823	29	0			23	0	1	0	759
2	7	20.7693	1.81155	4.62795	128	109	2.85014	30728.5	62.12	18.3583	56.7823	29	0			23	0	0	0	759
2	7	9.50856	3.00558	53.7844	129	125	1.66387	22327.6	126.92	18.3583	56.7823	29	0			23	0	1	0	759
1	1	9.05407	2.89025	20.7528	112	107	3.78397	52660	9.35	16.9558	66.9133	19	0			29	0	1	0	702
2	1	9.05407	2.89025	20.7528	133	130	3.78397	52660	9.35	16.9558	66.9133	19	0			29	0	1	0	702
1	3	9.10335	2.9726	17.4429	121	114	2.61691	35594.5	49.32	17.4986	52.8208	35	0			25	0	1	1	71
1	3	21.5222	0.780866	1.5644	98	112	1.73863	43308.3	5.54	17.4986	52.8208	35	0			25	0	0	1	71
2	3	9.10335	2.9726	17.4429	121	108	2.61691	35594.5	49.32	17.9783	58.9044	35	0			25	0	1	1	71
2	3	21.295	0.736707	1.5644	111	112	1.76656	43308.3	5.54	17.9783	58.9044	35	0			25	0	0	1	71
1	7	20.8515	1.83224	16.5843	87	105	2.59942	30586.5	114.87	16.6662	68.8519	44	0	70	26	34.5	0	0	1	632
1	7	9.78508	2.85583	31.1608	112	108	2.71497	34283.6	5.46	16.6662	68.8519	44	0	70	26	34.5	0	1	1	632
2	7	20.7775	1.76384	24.1417	99	97	3.56124	68217.1	97.13	16.6662	68.8519	44	0	70	26	34.5	0	0	1	632
2	7	9.78508	2.85583	31.1608	109	99	2.71497	34283.6	5.46	16.6662	68.8519	44	0	70	26	34.5	0	1	1	632
1	7	21.3251	1.75132	16.7062	95	99	2.34333	28584.4	73.52	18.3344	61.8225	19	0	67	26	20	1	0	1	499
1	7	10.1875	2.79441	48.0837	90	105	2.80372	41640	81.6	18.3344	61.8225	19	0	67	26	20	1	1	1	499
2	7	21.347	1.75132	16.7062	104	105	2.34333	28584.4	73.52	18.3344	61.8225	19	0	67	26	20	1	0	0	499
2	7	10.1875	2.79441	48.0837	106	93	2.80372	41640	81.6	18.3344	61.8225	19	0	67	26	20	1	1	0	499
1	1	10.13	2.34801	16.479	94	100	2.89057	60696.9	78.8	17.3637	54.0267	21	1	53	26	23	0	1	1	35
2	1	10.13	2.34801	16.479	88	97	2.89057	60696.9	78.8	17.3637	54.0267	21	1	53	26	23	0	1	1	35
1	1	9.07871	2.79878	22.6678	138	110	3.78247	32100	8.95	18.0408	62.3654	24	0			29	0	1	1	432
2	1	9.07871	2.79878	22.6678	128	116	3.78247	32100	8.95	18.0408	62.3654	24	0			29	0	1	1	432
1	1	9.8809	2.72122	25.2311	133	107	3.73311	80783.1	22.52	18.0275	64.7425	26	0			31	0	1	0	920
2	1	9.8809	2.72122	25.2311	110	109	3.73311	80783.1	22.52	18.0275	64.7425	26	0			31	0	1	0	920
1	1	23.2197	1.43989	4.57945	94	109	3.83217	119057	9.2	16.7717	59.689	17	0		29	27.5	0	0	1	963
1	1	10.9979	2.36431	9.66755	94	106	4.1643	119057	8.55	16.7717	59.689	17	0		29	27.5	0	1	1	963
2	1	10.9979	2.36431	9.66755	135	95	4.1643	119057	8.55	17.031	58.5169	17	0		29	27.5	0	1	0	963
1	3	10.423	2.51693	17.7586	77	89	3.5953	52654.4	31.54	15.8946	49.4	44	0			33	1	1	0	344
2	3	10.423	2.51693	17.7586	94	96	3.5953	52654.4	31.54	15.8946	49.4	44	0			33	1	1	0	344
1	2	9.5989	3.04702	36.5686	85	116	1.57928	24150.5	10.66	17.4358	57.1683	30	0			30	1	1	0	414
2	2	9.5989	3.04702	36.5686	94	105	1.57928	24150.5	10.66	17.4358	57.1683	30	0			30	1	1	0	414
1	2	9.8809	3.00971	105.477	101	88	2.19432	32327.6	259.82	17.3569	62.8708	22	0			26	0	1	0	957
2	2	9.8809	3.00971	105.477	94	67	2.19432	32327.6	259.82	17.3979	62.8663	22	0			26	0	1	0	957
2	2	20.7255	1.77738	48.2634	98	91	1.99041	32327.6	247.03	17.3979	62.8663	22	0			26	0	0	0	957
1	2	20.0246	1.78531	21.1747	76	109	2.77671	28772.4	76.49	17.4866	63.8715	32	0	62	27	50	1	0	0	365
1	2	9.04038	2.94631	76.2141	95	110	2.25796	30700.6	70.54	17.4866	63.8715	32	0	62	27	50	1	1	0	365
2	2	9.04038	2.94631	76.2141	91	83	2.25796	30700.6	70.54	17.4866	63.8715	32	0	62	27	50	1	1	0	365
1	1	10.1328	2.8443	28.638	109	117	3.52253	41839.5	82.31	18.3375	62.3292	23	0			44.5	0	1	0	575
2	1	10.1328	2.8443	28.638	114	106	3.52253	41839.5	82.31	18.3375	62.3292	23	0			44.5	0	1	0	575
1	3	9.11157	2.94765	10.2345	106	100	2.61504	31207.2	12.02	17.5156	62.6767	51	0			40	1	1	1	896
2	3	9.11157	2.94765	10.2345	105	108	2.61504	31207.2	12.02	17.5156	62.6767	51	0			40	1	1	1	896
1	2	9.63997	3.25395	8.02965	95	67	3.14435	28835.4	30.82	18.1821	54.9387	35	0			39	1	1	0	842
2	2	9.63997	3.25395	8.02965	107	79	3.14435	28835.4	30.82	18.1821	54.9387	35	0			39	1	1	0	842
1	2	9.58522	3.05107	88.0018	105	97	1.775	22166.8	367.86	18.0081	60.1322	48				40	1	1	1	471
2	2	9.58522	3.05107	88.0018	68	107	1.775	22166.8	367.86	18.0081	60.1322	48				40	1	1	0	471
1	2	9.67556	2.96015	45.6516	78	93	3.0238	55825.6	106.84	17.8112	63.181	27	0	70	26	38	0	1	1	35
2	2	9.67556	2.96015	45.6516	92	102	3.0238	55825.6	106.84	17.8112	63.181	27	0	70	26	38	0	1	1	35
1	2	9.00205	3.03681	163.778	96	107	2.21151	15881	1106.84	17.9812	61.14	23	0	51	24	39	1	1	0	456
1	2	21.3005	1.95331	75.7305	99	107	1.98475	15881	1085.86	17.9812	61.14	23	0	51	24	39	1	0	0	456
2	2	9.00205	3.03681	163.778	93	98	2.21151	15881	1106.84	17.9812	61.14	23	0	51	24	39	1	1	0	456
2	2	21.3005	1.95331	75.7305	94	113	1.98475	15881	1085.86	17.9812	61.14	23	0	51	24	39	1	0	0	456
1	2	9.29227	2.61677	48.8062	65	94	2.8627	28229.1	103.91	17.1711	56.1947	36	0			39	1	1	1	844
2	2	9.29227	2.61677	48.8062	82	77	2.8627	28229.1	103.91	17.0283	56.95	36	0			39	1	1	1	844
1	2	9.81793	3.04789	42.0117	82	112	1.788	19647.9	85.35	17.5813	56.1404	34	0	58	21	27.5	1	1	1	977
2	2	9.81793	3.04789	42.0117	85	83	1.788	19647.9	85.35	17.5813	56.1404	34	0	58	21	27.5	1	1	0	977
1	2	9.92471	2.78145	48.8122	85	96	3.65879	37383.6	48.77	17.9914	58.1506	26	0			35	1	1	0	498
2	2	9.92471	2.78145	48.8122	70	72	3.65879	37383.6	48.77	17.9914	58.1506	26	0			35	1	1	0	498
1	2	21.9274	1.95805	32.6256	120	106	1.77554	21821.2	121.82	18.0325	61.6017	24	0			45.5	1	0	0	677
1	2	9.40452	3.02101	69.4314	104	113	2.06497	21821.2	113.47	18.0325	61.6017	24	0			45.5	1	1	0	677
2	2	21.8973	1.95805	32.6256	114	123	1.77554	21821.2	121.82	18.0325	61.6017	24	0			45.5	1	0	0	677
2	2	9.40452	3.02101	69.4314	104	92	2.06497	21821.2	113.47	18.0325	61.6017	24	0			45.5	1	1	0	677
1	2	9.01027	3.03871	27.2949	98	99	2.1096	32768.8	13.8	17.6096	66.0754	22	0			25	1	1	1	635
2	2	9.01027	3.03871	27.2949	83	95	2.1096	32768.8	13.8	17.6096	66.0754	22	0			25	1	1	1	635
1	7	9.95483	3.257	11.4621	82	72	3.12973	19526.5	29.33	17.8467	56.1125	57	0			45	1	1	0	352
2	7	9.95483	3.257	11.4621	84	83	3.12973	19526.5	29.33	17.8467	56.1125	57	0			45	1	1	0	352
1	2	9.35797	2.77924	41.9166	113	114	4.12023	26667.5	95.2	16.5671	48.8656	21	0			42	1	1	1	597
2	2	9.35797	2.77924	41.9166	52	67	4.12023	26667.5	95.2	16.5671	48.8656	21	0			42	1	1	1	597
1	7	10.0315	2.76337	17.3855	118	126	4.05584	166105	56.51	16.4817	66.4017	21	0			26	0	1	1	239
2	7	10.0315	2.76337	17.3855	136	86	4.05584	166105	56.51	16.4817	66.4017	21	0			26	0	1	0	239
1	2	9.40452	2.40547	14.9345	98	107	3.02118	44327.2	49.09	14.775	49.7933		0				1	1	0	14
2	2	9.40452	2.40547	14.9345	94	89	3.02118	44327.2	49.09	14.775	49.7933		0				1	1	0	14
1	1	9.02122	2.76349	29.7551	128	127	4.2721	43255.2	10.45	16.5747	52.6367	28	0			22.5	0	1	1	725
2	1	9.02122	2.76349	29.7551	123	125	4.2721	43255.2	10.45	16.5747	52.6367	28	0			22.5	0	1	0	725
1	2	22.0643	1.78311	11.7902	93	107	3.31855	40765.8	116.48	17.8354	60.2417	19	0	58	25	39.5	1	0	1	511
1	2	10.0397	2.91851	25.5248	89	93	3.70216	40765.8	108.26	17.8354	60.2417	19	0	58	25	39.5	1	1	1	511
2	2	10.0397	2.91851	25.5248	77	88	3.70216	40765.8	108.26	18.1915	59.429	19	0	58	25	39.5	1	1	0	511
1	1	9.43737	2.13506	1.5583	82	74	4.50309	93608.6	2.58	17.2681	65.4021	21		68	19	20	0	1	0	752
2	1	9.43737	2.13506	1.5583	96	61	4.50309	93608.6	2.58	17.2681	65.4021	21		68	19	20	0	1	0	752
1	2	21.1691	1.06797	5.1323	81	85	1.77478	31077.7	11.58	16.8921	58.456	23	0			20	1	0	0	604
1	2	10.3244	2.85347	30.5512	76	81	1.96424	28966.2	0.44	16.8921	58.456	23	0			20	1	1	0	604
2	2	21.1198	1.06982	5.1323	87	76	1.85347	31077.7	11.58	16.8921	58.456	23	0			20	1	0	0	604
2	2	10.3244	2.85347	30.5512	86	83	1.96424	28966.2	0.44	16.8921	58.456	23	0			20	1	1	0	604
1	4	10.9925	2.9284	37.755	82	91	2.78625	26115.6	54.79	17.5447	64.6161	20	0			33	1	1	1	518
2	4	10.9925	2.9284	37.755	105	90	2.78625	26115.6	54.79	17.5447	64.6161	20	0			33	1	1	1	518
1	1	9.50034	2.8213	50.8128	129	124	4.38137	95436.4	175.95	17.4058	61.2267	18	0	76	32	30.5	0	1	1	212
2	1	9.50034	2.8213	50.8128	123	96	4.38137	95436.4	175.95	17.4058	61.2267	18	0	76	32	30.5	0	1	0	212
1	1	9.13347	3.00222	24.8925	120	112	2.69758	65773.8	44.54	17.7381	61.6083	24	0			36	0	1	1	28
2	1	9.13347	3.00222	24.8925	106	110	2.69758	65773.8	44.54	17.7672	61.9381	24	0			36	0	1	0	28
1	2	9.96304	3.03865	25.8429	101	75	3.1548	44377.9	14.4	17.8704	60.7123	27	0			30	1	1	1	345
2	2	21.1198	0.356015	3.04255	103	81	3.99839	51600.9	0.58	17.8704	60.7123	27	0			30	1	0	1	345
2	2	9.96304	3.03865	25.8429	83	105	3.1548	44377.9	14.4	17.8704	60.7123	27	0			30	1	1	1	345
1	1	9.33881	2.7232	20.8944	130	110	4.20422	43214.4	11.95	17.7217	56.9442	22	0			30	0	1	0	486
2	1	9.33881	2.7232	20.8944	91	112	4.20422	43214.4	11.95	17.7217	56.9442	22	0			30	0	1	0	486
1	2	10.9952	1.20889	4.2325	60	98	1.66928	22713.1	4.19	18.0467	45.6746	33	0			38	1	1	0	932
2	2	10.9952	1.20889	4.2325	81	106	1.66928	22713.1	4.19	18.0467	45.6746	33	0			38	1	1	0	932
1	2	9.38535	2.42542	24.9871	105	106	2.79418	35693.1	71.57	17.3558	57.0792	30	0			28	1	1	1	211
2	2	9.38535	2.42542	24.9871	97	108	2.79418	35693.1	71.57	17.3558	57.0792	30	0			28	1	1	1	211
1	2	9.06776	3.02528	10.6599	99	100	2.71763	31207.2	13.57	17.8017	64.0604	33	0	68	28	25.5	1	1	1	599
2	2	9.06776	3.02528	10.6599	104	91	2.71763	31207.2	13.57	17.8017	64.0604	33	0	68	28	25.5	1	1	1	599
1	2	10.6585	2.73274	86.3184	84	108	4.21275	92499.1	424.29	15.1072	54.9281	22	0	67	26	46	1	1	1	60
2	2	10.6585	2.73274	86.3184	81	105	4.21275	92499.1	424.29	15.1072	54.9281	22	0	67	26	46	1	1	0	60
1	1	20.0164	1.49497	23.8326	85	97	3.22068	49289.7	9.8	16.3922	51.5369						0	0	1	894
2	1	19.8166	1.50209	23.8326	101	107	3.27388	49289.7	9.8	16.3922	51.5369						0	0	1	894
1	7	19.8193	1.24416	6.05775	114	104	2.97333	67674.7	29.1	17.8865	50.8787	20	0	71	30	24	0	0	0	57
2	7	19.8193	1.24416	6.05775	102	105	2.97333	67674.7	29.1	17.8865	50.8787	20	0	71	30	24	0	0	0	57
2	7	9.16359	2.01439	10.1525	105	111	2.67447	67674.7	26.72	17.8865	50.8787	20	0	71	30	24	0	1	0	57
1	2	19.9918	1.71472	10.9878	99	111	2.24984	26174.2	12.67	18.0515	61.7999	25	0	69	26	46	0	0	1	317
1	2	9.20739	2.93997	24.1911	107	97	3.04876	54188.4	623.69	18.0515	61.7999	25	0	69	26	46	0	1	1	317
2	2	19.9562	1.6904	10.9878	109	92	2.25008	26174.2	12.67	18.0227	61.7914	25	0	69	26	46	0	0	1	317
2	2	9.20739	2.93997	24.1911	109	88	3.04876	54188.4	623.69	18.0227	61.7914	25	0	69	26	46	0	1	1	317
1	1	20.3203	1.62841	10.6956	112	114	3.45393	52215.7	81.98	18.2061	61.0319	29	0	76	31	21	0	0	1	15
1	1	9.16085	2.93526	22.8772	119	108	3.64578	52215.7	76.19	18.2061	61.0319	29	0	76	31	21	0	1	1	15
2	1	20.8515	1.72671	10.6956	103	105	3.33462	52215.7	81.98	18.2061	61.0319	29	0	76	31	21	0	0	1	15
2	1	9.16085	2.93526	22.8772	114	101	3.64578	52215.7	76.19	18.2061	61.0319	29	0	76	31	21	0	1	1	15
1	1	9.06502	3.01125	22.2878	107	95	2.7843	46965.2	33.98	17.9817	61.3448	17	0			31	1	1	0	255
2	1	9.06502	3.01125	22.2878	117	102	2.7843	46965.2	33.98	17.9817	61.3448	17	0			31	1	1	0	255
1	1	10.976	1.93565	30.2401	102	98	3.35987	67628.4	99.69	16.6967	61.02	20	0			21	0	1	1	151
2	1	10.976	1.93565	30.2401	106	114	3.35987	67628.4	99.69	16.6967	61.02	20	0			21	0	1	0	151
1	7	10.8501	2.47016	96.6534	103	85	3.34915	53223.4	219.9	14.9394	50.5647	18	0			28	0	1	1	340
2	7	10.8501	2.47016	96.6534	109	110	3.34915	53223.4	219.9	14.9394	50.5647	18	0			28	0	1	1	340
1	1	10.6913	2.90664	25.5665	117	117	3.41202	50664.1	38.74	18.2137	64.8021	40	0			27	0	1	1	580
2	1	10.6913	2.90664	25.5665	119	121	3.41202	50664.1	38.74	18.2137	64.8021	40	0			27	0	1	1	580
1	1	10.9897	2.36307	14.2609	111	93	3.80758	76182.6	90.6	16.595	61.4808	19	0			51	0	1	0	501
2	1	10.9897	2.36307	14.2609	125	103	3.80758	76182.6	90.6	16.595	61.4808	19	0			51	0	1	0	501
1	3	10.6968	2.95272	30.579	97	82	3.0352	40271.9	12.81	16.9808	62.3017	24	0			18	0	1	0	598
2	3	10.6968	2.95272	30.579	115	62	3.0352	40271.9	12.81	16.9808	62.3017	24	0			18	0	1	0	598
1	1	21.5441	1.49354	7.21745	117	105	4.10371	42659.9	5.4	17.4881	61.7969	20	0	75	29	39.5	0	0	1	533
1	1	10.694	2.52884	16.0105	113	113	4.31617	42659.9	5.02	17.4881	61.7969	20	0	75	29	39.5	0	1	1	533
2	1	21.5222	1.49354	7.21745	115	109	4.10371	42659.9	5.4	17.4881	61.7969	20	0	75	29	39.5	0	0	1	533
2	1	10.694	2.52884	16.0105	106	97	4.31617	42659.9	5.02	17.4881	61.7969	20	0	75	29	39.5	0	1	1	533
1	7	19.9206	1.51139	10.0563	119	97	2.87421	35522.1	7.52	18.0373	48.2544	42	1	74	29	34	0	0	0	490
1	7	9.24572	1.2928	3.99045	102	96	2.37233	45587.2	18.71	18.0373	48.2544	42	1	74	29	34	0	1	0	490
2	7	19.9206	1.51139	10.0563	115	108	2.87421	35522.1	7.52	18.0373	48.2544	42	1	74	29	34	0	0	0	490
2	7	9.24572	1.2928	3.99045	109	99	2.37233	45587.2	18.71	18.0373	48.2544	42	1	74	29	34	0	1	0	490
1	1	21.4593	1.5228	38.3969	127	126	2.53401	33888.5	626.69	17.6619	60.4269	19	0	76	30	21.5	0	0	1	636
1	1	10.768	2.62726	41.9402	128	120	2.93564	33888.5	3.25	17.6619	60.4269	19	0	76	30	21.5	0	1	1	636
2	1	21.5469	1.53471	38.3969	118	136	2.52031	33888.5	626.69	17.6619	60.4269	19	0	76	30	21.5	0	0	1	636
2	1	10.768	2.62726	41.9402	124	146	2.93564	33888.5	3.25	17.6619	60.4269	19	0	76	30	21.5	0	1	1	636
1	2	9.83436	3.07854	37.9725	83	110	1.76248	13811.6	40.21	18.0798	60.7194	42	0	55	23	31	0	1	0	288
2	2	9.83436	3.07854	37.9725	72	70	1.76248	13811.6	40.21	18.0798	60.7194	42	0	55	23	31	0	1	0	288
1	7	9.25394	2.96578	34.7965	81	67	2.72614	38894.9	100.3	17.03	62.6967	24	0			26	1	1	0	678
2	7	9.25394	2.96578	34.7965	84	62	2.72614	38894.9	100.3	17.03	62.6967	24	0			26	1	1	0	678
1	2	10.9322	3.06704	34.8901	89	125	3.26611	51750.2	51.76	17.4146	64.8029	21	0			24	1	1	1	575
2	2	10.9322	3.06704	34.8901	84	113	3.26611	51750.2	51.76	17.4146	64.8029	21	0			24	1	1	1	575
1	7	10.9952	3.02118	24.6894	75	59	3.3735	46770.8	10.04	17.3322	61.9783	35	0	75	32	31.5	1	1	1	747
2	7	10.9952	3.02118	24.6894	102	98	3.3735	46770.8	10.04	17.3322	61.9783	35	0	75	32	31.5	1	1	1	747
1	2	9.30595	3.07184	41.5468	80	101	1.82067	25451.6	56.66	17.9056	62.7425	27	0			27	1	1	1	681
2	2	9.30595	3.07184	41.5468	90	122	1.82067	25451.6	56.66	17.8463	62.2677	27	0			27	1	1	1	681
1	1	9.07324	2.94424	36.5706	136	100	3.14132	63137.3	28.03	16.6673	63.7346	22	0	75	29	31.5	0	1	1	763
2	1	9.07324	2.94424	36.5706	110	93	3.14132	63137.3	28.03	16.6673	63.7346	22	0	75	29	31.5	0	1	0	763
1	2	10.9541	3.01323	21.3615	71	93	3.49484	47399.6	14.64	17.0267	61.3047	22	0			45	1	1	1	57
2	2	10.9541	3.01323	21.3615	74	75	3.49484	47399.6	14.64	17.0267	61.3047	22	0			45	1	1	1	57
1	2	10.8611	3.07616	18.3215	59	91	3.47831	61666	16.79	17.4572	62.3031	26	0	57	19	34	1	1	1	678
2	2	10.8611	3.07616	18.3215	94	119	3.47831	61666	16.79	17.4572	62.3031	26	0	57	19	34	1	1	0	678
1	1	9.53593	2.55738	16.5457	133	88	4.60205	100812	6.97	17.0725	65.7992	36	0			40	0	1	1	162
1	1	20.3504	1.49203	7.5636	128	94	4.29629	100812	7.51	17.0725	65.7992	36	0			40	0	0	1	162
2	1	20.3669	1.49203	7.5636	111	85	4.29629	100812	7.51	17.0725	65.7992	36	0			40	0	0	1	162
2	1	9.53593	2.55738	16.5457	113	84	4.60205	100812	6.97	17.0725	65.7992	36	0			40	0	1	1	162
1	2	9.34155	3.00228	24.899	98	92	2.72542	38172.7	54.05	17.8438	66.3379	27	0			26	1	1	0	635
2	2	9.34155	3.00228	24.899	100	90	2.72542	38172.7	54.05	17.8438	66.3379	27	0			26	1	1	0	635
1	2	9.06502	3.02453	34.4411	96	103	3.29493	46770.8	10.65	17.6652	62.6715	32	0	71	29	25.5	0	1	0	596
2	2	9.06502	3.02453	34.4411	85	98	3.29493	46770.8	10.65	17.6652	62.6715	32	0	71	29	25.5	0	1	0	596
1	2	9.06502	3.00948	18.9426	95	108	3.2426	71031	15.44	17.3867	67.84	19	0			33	0	1	1	383
2	2	9.06502	3.00948	18.9426	96	94	3.2426	71031	15.44	17.3867	67.84	19	0			33	0	1	1	383
1	2	22.0205	1.83263	12.2108	97	89	2.70797	32344.4	57.93	17.4544	64.6004	21					1	0	1	550
1	2	9.75222	3.06874	27.4452	83	86	3.21842	32344.4	17.41	17.4544	64.6004	21					1	1	1	550
2	2	21.8371	1.82044	12.2108	84	107	2.70952	32344.4	57.93	17.4544	64.6004	21					1	0	0	550
2	2	9.75222	3.06874	27.4452	108	100	3.21842	32344.4	17.41	17.4544	64.6004	21					1	1	0	550
1	1	9.01848	2.32254	10.9695	115	108	2.77091	45999.8	63.13	17.5294	54.2283	25	0	71	30	28.5	0	1	1	661
2	1	9.01848	2.32254	10.9695	97	110	2.77091	45999.8	63.13	17.5294	54.2283	25	0	71	30	28.5	0	1	0	661
1	1	21.4237	1.95254	7.49965	127	131	3.0598	83386.5	7.12	16.8296	63.9892	24	0	75	29	37.5	0	0	1	774
1	1	9.02669	2.90611	16.7676	121	126	3.17175	83386.5	6.62	16.8296	63.9892	24	0	75	29	37.5	0	1	1	774
2	1	9.02669	2.90611	16.7676	114	128	3.17175	83386.5	6.62	16.8296	63.9892	24	0	75	29	37.5	0	1	0	774
1	2	9.79877	1.69792	4.908	78	122	2.15472	49388	12.63	16.8885	46.1279	20	0	56	28	40	1	1	1	873
2	2	21.6126	1.00525	3.00695	84	112	1.82947	49924	94.12	16.8885	46.1279	20	0	56	28	40	1	0	0	873
2	2	9.79877	1.69792	4.908	77	105	2.15472	49388	12.63	16.8885	46.1279	20	0	56	28	40	1	1	0	873
1	2	9.40999	2.63556	37.3879	94	113	3.00981	40069.4	81.38	16.3017	51.1828	22	0			18	1	1	1	133
2	2	9.40999	2.63556	37.3879	120	108	3.00981	40069.4	81.38	16.3017	51.1828	22	0			18	1	1	1	133
1	2	21.2868	1.80291	17.7295	85	90	2.32859	34104.5	22.91	18.0162	61.1606	49	0			44	1	0	1	711
1	2	10.6146	3.07881	39.6859	78	87	2.65989	34104.5	21.29	18.0162	61.1606	49	0			44	1	1	1	711
2	2	21.2348	1.77364	17.7295	61	58	2.33048	34104.5	22.91	18.0162	61.1606	49	0			44	1	0	1	711
2	2	10.6146	3.07881	39.6859	87	82	2.65989	34104.5	21.29	18.0162	61.1606	49	0			44	1	1	1	711
1	1	20.4517	1.33651	1.51005	126	125	3.89521	76075.3	48.05	17.9863	53.6117	22	0			39	0	0	0	845
1	1	9.77687	2.25217	3.60465	107	113	3.98431	76075.3	44.65	17.9863	53.6117	22	0			39	0	1	0	845
2	1	9.77687	2.25217	3.60465	110	101	3.98431	76075.3	44.65	17.9863	53.6117	22	0			39	0	1	0	845
1	2	10.8118	2.73262	10.2719	88	109	4.87356	148649	5.64	17.0667	65.6596	25	0	38	14	40	1	1	1	687
2	2	10.8118	2.73262	10.2719	125	116	4.87356	148649	5.64	17.0667	65.6596	25	0	38	14	40	1	1	0	687
1	2	10.8392	3.14655	42.6564	120	120	2.88454	25093.7	196.06	18.04	61.365	48	0			20	0	1	0	117
2	2	10.8392	3.14655	42.6564	119	125	2.88454	25093.7	196.06	18.04	61.365	48	0			20	0	1	0	117
1	2	9.27036	3.12242	37.0722	52	80	2.1466	23923.3	392.81	18.2831	64.9081	32		47	21		1	1	1	136
2	2	9.27036	3.12242	37.0722	87	88	2.1466	23923.3	392.81	18.2831	64.9081	32		47	21		1	1	1	136
1	7	9.07324	2.53362	6.42245	119	103	2.36167	39811.1	32.59	17.3977	70.2785	29	1	54	29	32	1	1	0	864
2	7	9.07324	2.53362	6.42245	101	95	2.36167	39811.1	32.59	17.3977	70.2785	29	1	54	29	32	1	1	0	864
1	7	9.16906	2.52528	11.4219	131	114	3.44819	56121.8	9.81	14.9525	49.8797	35	0	55	24	32.5	1	1	0	396
2	7	9.16906	2.52528	11.4219	121	127	3.44819	56121.8	9.81	14.9525	49.8797	35	0	55	24	32.5	1	1	0	396
1	1	9.05133	2.73908	14.0759	99	116	2.52433	67119.2	56.23	17.2397	69.8781	19	0	56	27	23	1	1	1	928
2	1	9.05133	2.73908	14.0759	122	94	2.52433	67119.2	56.23	17.0323	70.18	19	0	56	27	23	1	1	0	928
1	7	10.5051	2.57178	38.7496	107	92	2.38568	36717.3	82.18	14.8575	49.675	35	0			40	0	1	1	68
2	7	10.5051	2.57178	38.7496	87	88	2.38568	36717.3	82.18	14.8575	49.675	35	0			40	0	1	1	68
1	2	10.976	2.51417	12.1144	90	117	3.68359	64482.7	10.32	16.5575	61.5892	25	1			30	1	1	1	626
2	2	10.976	2.51417	12.1144	98	133	3.68359	64482.7	10.32	16.5575	61.5892	25	1			30	1	1	1	626
1	2	10.8364	3.05913	20.1195	96	113	2.59384	21754	10.19	16.6078	68.7461	50	0	56	23	19.5	1	1	1	246
2	2	10.8364	3.05913	20.1195	96	106	2.59384	21754	10.19	16.6078	68.7461	50	0	56	23	19.5	1	1	1	246
1	7	9.10883	2.67369	19.9951	99	99	3.90429	47280.4	12.07	18.186	60.2358	31	0	55	22	26.5	0	1	1	87
1	7	19.5017	1.51487	9.4964	110	98	3.62139	47280.4	12.99	18.186	60.2358	31	0	55	22	26.5	0	0	1	87
2	7	9.10883	2.67369	19.9951	107	115	3.90429	47280.4	12.07	18.186	60.2358	31	0	55	22	26.5	0	1	1	87
2	7	19.5044	1.51487	9.4964	109	112	3.62139	47280.4	12.99	18.186	60.2358	31	0	55	22	26.5	0	0	1	87
1	1	10.204	2.84796	37.0262	95	100	3.31842	59952	22.42	18.6181	59.2583	17	0	51	23	24.5	1	1	0	969
2	1	10.204	2.84796	37.0262	103	106	3.31842	59952	22.42	18.6181	59.2583	17	0	51	23	24.5	1	1	0	969
1	3	8.99932	3.17067	15.8674	89	64	2.62505	27986.8	10.34	17.6069	64.5342	36	0	51	25	41	1	1	1	465
2	3	8.99932	3.17067	15.8674	96	70	2.62505	27986.8	10.34	17.6069	64.5342	36	0	51	25	41	1	1	1	465
1	2	9.50856	3.11742	24.6868	109	109	2.08793	31139.8	105.12	17.6733	61.9571	38	0	52	28	42	0	1	0	941
1	2	19.9973	1.74132	11.3941	106	97	1.76828	31139.8	113.09	17.6733	61.9571	38	0	52	28	42	0	0	0	941
2	2	9.50856	3.11742	24.6868	118	104	2.08793	31139.8	105.12	17.6733	61.9571	38	0	52	28	42	0	1	0	941
2	2	19.9973	1.70587	15.1197	109	97	3.21694	19573.8	4.67	17.6733	61.9571	38	0	52	28	42	0	0	0	941
1	4	9.03765	3.16991	25.5651	101	130	3.53938	51750.2	87.76	17.8042	62.1571	20	0	51	22	31	1	1	1	249
2	4	9.03765	3.16991	25.5651	97	133	3.53938	51750.2	87.76	17.8042	62.1571	20	0	51	22	31	1	1	1	249
1	1	9.00205	2.92156	30.9774	120	126	3.34288	47821.5	92.9	18.0928	62.9767	17	0	54	29	24	1	1	0	787
2	1	9.00205	2.92156	30.9774	111	125	3.34288	47821.5	92.9	18.0928	62.9767	17	0	54	29	24	1	1	0	787
1	2	9.01027	2.99067	83.8798	84	86	2.73885	32766	141.26	17.5825	69.2667	44	1	51	14	45	1	1	1	72
2	2	9.01027	2.99067	83.8798	88	72	2.73885	32766	141.26	17.5825	69.2667	44	1	51	14	45	1	1	1	72
1	2	9.24025	2.59934	68.1145	118	118	2.31415	43018.8	199.81	15.8583	54.8825	31	0	50	25	48	1	1	1	78
2	2	9.24025	2.59934	68.1145	104	109	2.31415	43018.8	199.81	15.8583	54.8825	31	0	50	25	48	1	1	1	78
1	2	9.21013	3.10562	41.23	101	103	2.55047	23694.7	460.54	18.3533	60.9052	22	0	51	24	35	1	1	1	387
1	2	19.8111	1.80827	19.3687	83	117	2.25819	23694.7	437.84	18.3533	60.9052	22	0	51	24	35	1	0	1	387
2	2	9.21013	3.10562	41.23	100	79	2.55047	23694.7	460.54	18.3533	60.9052	22	0	51	24	35	1	1	1	387
2	2	20.0548	1.8253	19.3687	107	104	2.21591	23694.7	437.84	18.3533	60.9052	22	0	51	24	35	1	0	1	387
1	3	9.05407	3.11194	19.4775	97	78	2.57163	32039.4	123.56	17.5925	63.1767	22	0	39	7	38	0	1	1	357
2	3	9.05407	3.11194	19.4775	96	83	2.57163	32039.4	123.56	17.5925	63.1767	22	0	39	7	38	0	1	0	357
1	2	9.61533	2.87226	21.0184	99	95	2.68602	40853.9	26.18	17.9304	63.195	25	0	53	26	35	1	1	1	666
2	2	9.61533	2.87226	21.0184	109	98	2.68602	40853.9	26.18	17.9304	63.195	25	0	53	26	35	1	1	1	666
1	2	10.7461	3.28184	47.9268	82	77	3.37697	33788.8	18.98	16.865	55.61	24	0	55	27	35	0	1	1	676
2	2	10.7461	3.28184	47.9268	87	69	3.37697	33788.8	18.98	16.865	55.61	24	0	55	27	35	0	1	1	676
1	2	9.01027	3.07897	21.8828	76	70	2.81772	40069.5	29.64	17.7096	61.4462	19	0			30	0	1	0	917
2	2	19.3046	1.74699	24.7477	71	79	3.14319	52578.9	161.64	17.7096	61.4462	19	0			30	0	0	0	917
2	2	9.01027	3.07897	21.8828	91	61	2.81772	40069.5	29.64	17.7096	61.4462	19	0			30	0	1	0	917
1	2	9.02122	2.86728	16.3616	128	97	5.09833	85131.5	24.96	16.9442	51.9492	22	0	72	28	32.5	1	1	0	543
2	2	9.02122	2.86728	16.3616	131	95	5.09833	85131.5	24.96	16.9442	51.9492	22	0	72	28	32.5	1	1	0	543
1	1	10.924	2.01969	7.04905	130	121	3.58953	103443	0.39	17.2223	63.9631	21	0	57	29	25	0	1	0	40
2	1	10.924	2.01969	7.04905	130	100	3.58953	103443	0.39	17.2223	63.9631	21	0	57	29	25	0	1	0	40
1	2	10.6886	2.99015	46.441	117	123	3.08463	45473.8	19.67	16.4506	67.5442	52	0			39	1	1	1	544
2	2	10.6886	2.99015	46.441	107	105	3.08463	45473.8	19.67	16.4506	67.5442	52	0			39	1	1	1	544
1	2	9.86174	2.60845	29.8213	109	96	3.35523	45379.9	9.98	17.7808	56.599	24		55	27	43	0	1	0	212
2	2	9.86174	2.60845	29.8213	113	92	3.35523	45379.9	9.98	17.7808	56.599	24		55	27	43	0	1	0	212
1	2	9.4757	2.73399	68.2066	89	113	3.06919	45365.5	167.62	16.935	65.0242	47	0	21	11	36	1	1	1	633
2	2	9.4757	2.73399	68.2066	95	100	3.06919	45365.5	167.62	16.935	65.0242	47	0	21	11	36	1	1	1	633
1	2	10.9185	3.10883	21.1859	63	94	2.3357	20471.6	51.49	17.3733	64.455	40	0	43	17	33	1	1	0	83
2	2	10.9185	3.10883	21.1859	66	82	2.3357	20471.6	51.49	17.3733	64.455	40	0	43	17	33	1	1	0	83
1	7	10.3573	2.87425	15.5212	86	115	3.87112	71312.1	57.55	18.385	60.1285	20		73	24	42.5	0	1	0	615
2	7	10.3573	2.87425	15.5212	93	113	3.87112	71312.1	57.55	18.385	60.1285	20		73	24	42.5	0	1	0	615
1	7	9.80972	2.63051	22.7772	129	104	3.87543	50582.4	44.28	17.0985	58.9917	41	0	55	26	34.5	0	1	1	166
2	7	9.80972	2.63051	22.7772	115	101	3.87543	50582.4	44.28	17.1017	59.0444	41	0	55	26	34.5	0	1	1	166
1	7	9.78508	2.87393	33.8518	122	104	2.77115	36261.9	18.49	18.5256	62.0075	19	0	54	22	28.5	1	1	1	9
2	7	9.78508	2.87393	33.8518	117	88	2.77115	36261.9	18.49	18.5256	62.0075	19	0	54	22	28.5	1	1	1	9
1	2	20.1424	1.72605	23.8069	84	105	2.17411	26994.5	78.54	16.6673	68.2904	29	0			24.5	1	0	0	114
1	2	9.1499	2.9627	50.1053	97	95	2.46472	26994.5	26.43	16.6673	68.2904	29	0			24.5	1	1	0	114
2	2	20.1451	1.72605	23.8069	96	111	2.17411	26994.5	78.54	16.6673	68.2904	29	0			24.5	1	0	0	114
2	2	9.1499	2.9627	50.1053	97	109	2.46472	26994.5	26.43	16.6673	68.2904	29	0			24.5	1	1	0	114
1	1	9.77413	2.80523	23.3085	89	80	3.62778	32964.6	68.15	17.654	62.8981	27	0	50	25	36	0	1	1	614
2	1	9.77413	2.80523	23.3085	111	67	3.62778	32964.6	68.15	17.654	62.8981	27	0	50	25	36	0	1	0	614
1	2	9.86721	3.03023	56.3157	100	102	3.00353	39928.7	577.46	17.6758	64.8617	29	0	54	23	45	0	1	1	955
2	2	9.86721	3.03023	56.3157	74	99	3.00353	39928.7	577.46	17.6758	64.8617	29	0	54	23	45	0	1	1	955
1	2	9.53046	3.12247	17.9805	112	126	2.63082	46599.8	12.56	18.0027	62.9946	59	1	54	28	44.5	1	1	1	422
2	2	9.53046	3.12247	17.9805	83	98	2.63082	46599.8	12.56	18.0027	62.9946	59	1	54	28	44.5	1	1	0	422
1	1	9.50308	3.01468	36.7951	127	104	4.4413	78631.2	86.08	17.8028	62.4394	25	0	55	24	24	0	1	1	589
2	1	9.50308	3.01468	36.7951	128	90	4.4413	78631.2	86.08	17.8014	61.0111	25	0	55	24	24	0	1	1	589
1	1	21.1554	1.55169	11.9985	92	108	3.22954	58745.7	9.09	17.72	60.6904	22	0	35	18	37.5	1	0	0	283
1	1	9.32786	2.69371	25.4505	115	98	3.62406	58745.7	8.44	17.72	60.6904	22	0	35	18	37.5	1	1	0	283
2	1	9.32786	2.69371	25.4505	104	105	3.62406	58745.7	8.44	17.72	60.6904	22	0	35	18	37.5	1	1	0	283
1	1	19.9398	1.78228	19.4018	124	123	2.52356	51738.4	213.37	17.2825	64.2475	25	0	55	27	18	0	0	1	409
1	1	9.57974	2.88035	22.4051	116	115	3.91928	63308.7	5.17	17.2825	64.2475	25	0	55	27	18	0	1	1	409
2	1	9.57974	2.88035	22.4051	130	131	3.91928	63308.7	5.17	17.3479	63.8485	25	0	55	27	18	0	1	0	409
2	1	19.8549	1.74946	19.4018	137	130	2.50892	51738.4	213.37	17.3479	63.8485	25	0	55	27	18	0	0	0	409
1	2	9.86995	3.10111	71.706	125	121	2.0694	16459.8	552.16	17.9178	62.9822	37	0	57	24	31.5	1	1	1	662
2	2	9.86995	3.10111	71.706	109	117	2.0694	16459.8	552.16	17.9178	62.9822	37	0	57	24	31.5	1	1	1	662
1	2	9.70021	3.07056	7.16795	77	124	2.57743	24931.7	9.94	17.5858	66.0973	23	0	55	19	31	1	1	1	59
2	2	9.70021	3.07056	7.16795	85	82	2.57743	24931.7	9.94	17.5858	66.0973	23	0	55	19	31	1	1	1	59
1	1	9.77413	2.86978	52.0566	123	100	3.5218	46610.7	39.04	18.0167	61.4183	26	0	48	22	48.5	0	1	1	360
2	1	9.77413	2.86978	52.0566	100	108	3.5218	46610.7	39.04	18.0167	61.4183	26	0	48	22	48.5	0	1	1	360
1	4	9.71116	2.42106	14.6738	89	116	3.276	93607.9	85.89	17.3879	55.736	28	0	49	24	49.5	1	1	0	382
2	4	20.5941	1.22842	6.58545	112	108	2.9633	93607.9	92.42	17.3879	55.736	28	0	49	24	49.5	1	0	0	382
2	4	9.71116	2.42106	14.6738	92	104	3.276	93607.9	85.89	17.3879	55.736	28	0	49	24	49.5	1	1	0	382
1	7	9.47296	3.11691	42.6058	94	90	2.40962	28429.6	47.26	17.7346	62.6833	30	0	51	27	27	1	1	0	319
2	7	9.47296	3.11691	42.6058	86	93	2.40962	28429.6	47.26	17.7346	62.6833	30	0	51	27	27	1	1	0	319
1	7	20.3066	0.649582	1.52645	84	79	1.9775	45063.6	32.45	16.7103	42.7461	31	0	51	16	29	0	0	0	155
1	7	9.37714	2.6471	36.0037	93	73	3.26665	40069.4	87.74	16.7103	42.7461	31	0	51	16	29	0	1	0	155
2	7	20.3943	0.640307	1.52645	83	101	1.96807	45063.6	32.45	16.7103	42.7461	31	0	51	16	29	0	0	0	155
2	7	9.37714	2.6471	36.0037	101	90	3.26665	40069.4	87.74	16.7103	42.7461	31	0	51	16	29	0	1	0	155
1	3	9.12526	3.10401	33.9076	117	104	2.60291	54132.9	206.44	16.965	67.9433	33	0	55	29	53	0	1	1	246
2	3	9.12526	3.10401	33.9076	110	108	2.60291	54132.9	206.44	16.965	67.9433	33	0	55	29	53	0	1	1	246
1	2	9.2512	3.16919	26.0268	108	101	2.0878	33436.5	81.21	17.7942	60.3625	25	0	48	17	33	1	1	0	781
2	2	9.2512	3.16919	26.0268	89	97	2.0878	33436.5	81.21	17.7942	60.3625	25	0	48	17	33	1	1	0	781
1	3	9.06229	3.12623	86.901	85	66	2.30708	20800.4	37.21	16.7517	65.0992	68	0	42	11	29	1	1	1	116
2	3	9.06229	3.12623	86.901	47	63	2.30708	20800.4	37.21	16.7517	65.0992	68	0	42	11	29	1	1	1	116
1	2	9.63997	3.09045	43.4833	96	111	2.1165	24045.4	521.07	18.2473	61.9169	25	0	54	20	24	1	1	0	605
2	2	9.63997	3.09045	43.4833	94	116	2.1165	24045.4	521.07	18.2473	61.9169	25	0	54	20	24	1	1	0	605
1	1	19.5729	1.35069	0.73335	105	111	4.074	97391	4.97	17.7678	55.7928	17	0	57	22	31	0	0	1	9
1	1	9.15264	2.28033	1.70055	124	96	4.44005	97391	4.62	17.7678	55.7928	17	0	57	22	31	0	1	1	9
2	1	19.5592	1.35069	0.73335	118	107	4.074	97391	4.97	17.7678	55.7928	17	0	57	22	31	0	0	0	9
2	1	9.15264	2.28033	1.70055	122	141	4.44005	97391	4.62	17.7678	55.7928	17	0	57	22	31	0	1	0	9
1	3	9.3306	3.04804	12.0811	91	82	2.91279	32197.8	9.34	16.34	66.8908	21	0	53	24	23.5	0	1	1	401
2	3	20.3778	1.8612	5.49895	112	95	2.68448	32197.8	9.94	16.34	66.8908	21	0	53	24	23.5	0	0	1	401
2	3	9.3306	3.04804	12.0811	93	89	2.91279	32197.8	9.34	16.34	66.8908	21	0	53	24	23.5	0	1	1	401
1	7	9.98768	3.10776	18.1273	101	110	2.72492	31026.7	17.63	17.3617	63.3942	43	0	54	28	34	1	1	1	424
2	7	9.98768	3.10776	18.1273	115	98	2.72492	31026.7	17.63	17.3617	63.3942	43	0	54	28	34	1	1	0	424
1	2	9.30322	3.01377	10.0405	107	102	2.98325	30877.7	68.15	17.6758	64.8617	40	0	55	23	40	1	1	1	398
2	2	9.30322	3.01377	10.0405	126	109	2.98325	30877.7	68.15	17.6758	64.8617	40	0	55	23	40	1	1	1	398
1	1	9.9822	2.58072	21.8658	117	114	4.05255	100812	46.71	17.4231	58.1958	24	1	55	28	23	0	1	1	354
2	1	9.9822	2.58072	21.8658	130	121	4.05255	100812	46.71	17.4231	58.1958	24	1	55	28	23	0	1	1	354
1	3	9.06776	3.02688	18.7722	97	102	3.31199	52043.3	10.32	17.1158	65.7446	31	1	54	21	46	1	1	1	883
2	3	9.06776	3.02688	18.7722	117	95	3.31199	52043.3	10.32	17.1158	65.7446	31	1	54	21	46	1	1	0	883
1	1	9.01574	2.90944	23.6348	115	96	3.13421	35103.8	32.45	18.1804	62.5702	34	0	55	29	27	0	1	1	550
2	1	9.01574	2.90944	23.6348	106	113	3.13421	35103.8	32.45	18.1804	62.5702	34	0	55	29	27	0	1	1	550
1	2	9.22656	2.67	16.8391	129	110	3.40603	58044.9	96.76	16.8925	66.7217	23	0	54	23	32	1	1	1	457
2	2	9.22656	2.67	16.8391	139	99	3.40603	58044.9	96.76	16.8925	66.7217	23	0	54	23	32	1	1	0	457
1	1	19.5017	1.49258	0.2063	141	128	6.02643	86434.2	0.13	17.6592	58.4378	24	0	56	29	24	0	0	1	101
1	1	9.19644	2.52798	0.42035	150	116	6.17841	86434.2	0.12	17.6592	58.4378	24	0	56	29	24	0	1	1	101
2	1	20.3368	1.41879	0.2063	124	112	5.77245	86434.2	0.13	17.6592	58.4378	24	0	56	29	24	0	0	0	101
2	1	9.19644	2.52798	0.42035	146	104	6.17841	86434.2	0.12	17.6592	58.4378	24	0	56	29	24	0	1	0	101
1	1	9.39083	3.08209	17.9772	72	96	2.20974	18736.8	69.88	17.9579	62.785	19	0	47	22	23	1	1	0	298
2	1	9.39083	3.08209	17.9772	79	73	2.20974	18736.8	69.88	17.9579	62.785	19	0	47	22	23	1	1	0	298
1	1	21.2183	1.5377	15.1568	117	111	3.75236	78882.2	5.56	17.5906	56.7344	29	0	55	27	40.5	1	0	0	902
1	1	9.31417	2.36495	13.4504	103	114	3.60148	67857.5	32.21	17.5906	56.7344	29	0	55	27	40.5	1	1	0	902
2	1	21.0513	0.278982	17.7524	108	99	3.63793	28865.2	116.98	17.5906	56.7344	29	0	55	27	40.5	1	0	0	902
2	1	9.31417	2.36495	13.4504	115	100	3.60148	67857.5	32.21	17.5906	56.7344	29	0	55	27	40.5	1	1	0	902
1	2	19.3621	1.82069	8.83025	92	90	2.25595	35283.9	3.33	17.8706	61.1306	36	0	43	14	23	1	0	0	240
1	2	9.49213	3.01195	20.9416	103	90	2.44636	35283.9	3.1	17.8706	61.1306	36	0	43	14	23	1	1	0	240
2	2	19.3621	1.82069	8.83025	111	100	2.25595	35283.9	3.33	17.8706	61.1306	36	0	43	14	23	1	0	0	240
2	2	9.49213	3.01195	20.9416	128	118	2.44636	35283.9	3.1	17.8706	61.1306	36	0	43	14	23	1	1	0	240
1	4	9.64545	2.61103	24.0346	102	117	3.43871	37932.6	97.8	17.1108	59.2554	17	0	41	16	31	1	1	1	950
2	4	9.64545	2.61103	24.0346	111	93	3.43871	37932.6	97.8	17.1108	59.2554	17	0	41	16	31	1	1	0	950
1	2	20.0684	1.81097	30.2593	75	91	2.07296	29447.9	336.16	18.0067	61.7828	46	1	58	26	42.5	1	0	1	886
1	2	9.37166	3.10652	67.7255	79	92	2.42174	29447.9	335.54	18.0067	61.7828	46	1	58	26	42.5	1	1	1	886
2	2	20.0657	1.81097	30.2593	65	95	2.07296	29447.9	336.16	18.0067	61.7828	46	1	58	26	42.5	1	0	0	886
2	2	9.37166	3.10652	67.7255	89	95	2.42174	29447.9	335.54	18.0067	61.7828	46	1	58	26	42.5	1	1	0	886
1	2	22.078	2.03526	10.3071	103	111	2.17856	25710.5	9.26	17.8677	63.3802	22	0	54	16	24	1	0	1	163
1	2	10.0999	3.15691	22.1907	91	90	2.58363	25710.5	9.59	17.8677	63.3802	22	0	54	16	24	1	1	1	163
2	2	10.0999	3.15691	22.1907	98	105	2.58363	25710.5	9.59	17.8677	63.3802	22	0	54	16	24	1	1	1	163
1	3	9.19097	3.02993	42.3163	86	96	2.58762	25484.2	32.85	16.5912	67.4979	46		47	15	41	1	1	0	563
2	3	9.19097	3.02993	42.3163	79	96	2.58762	25484.2	32.85	16.1175	67.8978	46		47	15	41	1	1	0	563
1	3	20.0849	1.64504	29.3411	97	107	2.88997	36261.9	535.45	17.6752	60.9192	20	0	52	20	40	1	0	1	527
1	3	9.17454	2.44462	10.8713	106	77	3.45796	48967	11.42	17.6752	60.9192	20	0	52	20	40	1	1	1	527
2	3	20.2136	1.63577	29.3411	92	80	2.89555	36261.9	535.45	17.485	60.1622	20	0	52	20	40	1	0	0	527
2	3	9.17454	2.44462	10.8713	91	79	3.45796	48967	11.42	17.485	60.1622	20	0	52	20	40	1	1	0	527
1	2	9.08145	3.07618	88.8371	72	96	2.63558	25010.3	739.64	17.6758	64.8617	21	0	55	26	45	1	1	0	257
2	2	9.08145	3.07618	88.8371	84	96	2.63558	25010.3	739.64	17.6758	64.8617	21	0	55	26	45	1	1	0	257
1	4	20.9747	1.94105	20.3709	109	102	2.22702	19647.9	125.66	16.8544	64.4356	20	0	43	19	28	1	0	1	11
1	4	9.05955	2.8469	25.2386	89	83	2.09603	40845.4	75.67	16.8544	64.4356	20	0	43	19	28	1	1	1	11
2	4	21.0048	1.94105	20.3709	109	120	2.22702	19647.9	125.66	16.8544	64.4356	20	0	43	19	28	1	0	1	11
2	4	9.05955	2.8469	25.2386	97	119	2.09603	40845.4	75.67	16.8544	64.4356	20	0	43	19	28	1	1	1	11
1	1	9.07324	2.96529	32.8007	121	99	3.27696	41640	33.82	18.1211	63.2381	19	0	54	21	18	0	1	1	173
2	1	9.07324	2.96529	32.8007	98	93	3.27696	41640	33.82	18.1211	63.2381	19	0	54	21	18	0	1	0	173
1	2	9.12799	3.09299	19.5336	103	74	3.52257	53071.6	46.69	17.24	62.5633	20	0	49		29	1	1	1	114
2	2	9.12799	3.09299	19.5336	103	90	3.52257	53071.6	46.69	17.24	62.5633	20	0	49		29	1	1	1	114
1	2	10.9624	3.12179	28.647	107	117	4.0673	41508.8	203.83	18.4221	61.9852	19	0	49	18	28.5	1	1	1	257
2	2	10.9624	3.12179	28.647	101	113	4.0673	41508.8	203.83	18.4221	61.9852	19	0	49	18	28.5	1	1	1	257
1	2	10.8939	2.89852	18.8128	99	125	2.56416	33070.9	9.19	18.5727	62.1998	17	0	51	21	34	1	1	0	845
2	2	10.8939	2.89852	18.8128	101	114	2.56416	33070.9	9.19	18.5727	62.1998	17	0	51	21	34	1	1	0	845
1	1	21.3306	1.21467	1.687	106	127	3.47859	122583	27.59	17.7927	56.0765	22	0	52	22	23	0	0	1	330
1	1	9.4319	2.35064	12.1615	134	111	3.71535	67857.5	38.23	17.7927	56.0765	22	0	52	22	23	0	1	1	330
2	1	20.4025	1.01861	1.687	132	127	3.69693	122583	27.59	17.7927	56.0765	22	0	52	22	23	0	0	1	330
2	1	9.4319	2.35064	12.1615	117	124	3.71535	67857.5	38.23	17.7927	56.0765	22	0	52	22	23	0	1	1	330
1	1	9.3744	2.95636	37.1845	122	91	3.50677	67896.5	9.31	18.3375	62.8329	26	0	56	22	35.5	0	1	1	448
2	1	9.3744	2.95636	37.1845	134	113	3.50677	67896.5	9.31	18.3375	62.8329	26	0	56	22	35.5	0	1	1	448
1	1	20.679	1.49511	1.33575	105	79	4.035	93732.7	3.6	17.6642	62.9683	25	0	55	25	34	0	0	1	886
1	1	9.09788	2.44609	3.0591	78	87	4.51607	93732.7	3.35	17.6642	62.9683	25	0	55	25	34	0	1	1	886
2	1	21.0267	1.5772	1.33575	119	87	3.84131	93732.7	3.6	17.6642	62.9683	25	0	55	25	34	0	0	1	886
2	1	9.09788	2.44609	3.0591	109	96	4.51607	93732.7	3.35	17.6642	62.9683	25	0	55	25	34	0	1	1	886
1	3	9.96304	3.1319	8.3883	94	59	2.67855	33844.4	10.29	17.8279	65.2752	23	0	51	25	19	0	1	1	861
2	3	9.96304	3.1319	8.3883	107	58	2.67855	33844.4	10.29	17.8279	65.2752	23	0	51	25	19	0	1	1	861
1	2	9.09788	3.13737	21.683	95	96	2.3497	24811.5	4.77	17.7392	62.3487	18	0			34	1	1	1	450
2	2	9.09788	3.13737	21.683	75	118	2.3497	24811.5	4.77	17.7392	62.3487	18	0			34	1	1	1	450
1	7	20.0575	1.77042	7.36535	118	125	3.3941	49501.6	10.63	18.0292	62.0189	30	0	55	26	25	0	0	1	131
1	7	9.57974	3.08666	30.4892	109	130	3.52074	47633	46.35	18.0292	62.0189	30	0	55	26	25	0	1	1	131
2	7	20.0192	1.77042	7.36535	103	116	3.3941	49501.6	10.63	18.0292	62.0189	30	0	55	26	25	0	0	0	131
2	7	9.57974	3.08666	30.4892	95	107	3.52074	47633	46.35	18.0292	62.0189	30	0	55	26	25	0	1	0	131
1	1	19.4086	0.840206	3.5997	112	115	2.29154	55128.6	32.32	16.9642	40.4365	20	0	55	29	35	0	0	0	527
1	1	9.20192	1.34209	7.2631	111	115	2.43082	55128.6	30.04	16.9642	40.4365	20	0	55	29	35	0	1	0	527
2	1	19.4059	0.840206	3.5997	111	117	2.29154	55128.6	32.32	16.9642	40.4365	20	0	55	29	35	0	0	0	527
2	1	9.20192	1.34209	7.2631	114	111	2.43082	55128.6	30.04	16.9642	40.4365	20	0	55	29	35	0	1	0	527
1	7	9.06502	3.13983	20.1538	109	116	2.62195	31424.5	67.12	18.2836	61.8172	32	0	54	28	29	1	1	1	399
2	7	9.06502	3.13983	20.1538	99	77	2.62195	31424.5	67.12	18.2836	61.8172	32	0	54	28	29	1	1	1	399
1	4	20.1862	1.55223	14.5398	96	89	2.85963	29146.1	8.31	17.92	64.2381	18	0	54	27	49	0	0	0	701
1	4	9.50856	2.75409	30.4873	75	96	3.22929	29146.1	7.72	17.92	64.2381	18	0	54	27	49	0	1	0	701
2	4	21.6044	1.57575	6.19215	100	76	3.03903	42550.1	9.72	17.92	64.2381	18	0	54	27	49	0	0	0	701
2	4	9.50856	2.75409	30.4873	73	74	3.22929	29146.1	7.72	17.92	64.2381	18	0	54	27	49	0	1	0	701
1	2	10.1656	3.17873	46.9868	88	70	1.7386	13811.2	79.3	18.0962	62.7483	38	0			35	1	1	1	194
2	2	10.1656	3.17873	46.9868	49	61	1.7386	13811.2	79.3	18.0962	62.7483	38	0			35	1	1	0	194
1	1	20.0712	1.58991	0.8227	112	101	5.39032	112845	4.22	17.9263	57.0342	17	0	55	24	23	0	0	1	390
1	1	9.86448	2.7298	1.1148	127	79	5.83488	158408	5.03	17.9263	57.0342	17	0	55	24	23	0	1	1	390
2	1	9.86448	2.7298	1.1148	130	98	5.83488	158408	5.03	17.9263	57.0342	17	0	55	24	23	0	1	1	390
1	2	9.25941	3.07637	31.6109	113	91	2.5655	28910	25.78	18.1902	62.1758	44	0	55	22	39.5	1	1	0	647
2	2	19.3265	1.79646	12.3283	91	93	2.31827	31026.7	103.26	18.1902	62.1758	44	0	55	22	39.5	1	0	0	647
2	2	9.25941	3.07637	31.6109	105	84	2.5655	28910	25.78	18.1902	62.1758	44	0	55	22	39.5	1	1	0	647
1	1	9.0486	2.80733	23.9356	111	106	2.95049	67791.5	137.43	17.0761	68.9589	20	0	54	30	27.5	1	1	0	947
2	1	9.0486	2.80733	23.9356	102	127	2.95049	67791.5	137.43	17.0121	68.8171	20	0	54	30	27.5	1	1	0	947
1	2	9.72211	3.12633	33.7046	69	93	2.6411	20058	10.27	17.6129	63.6392	44	0	52	23	43	1	1	1	804
2	2	9.72211	3.12633	33.7046	93	89	2.6411	20058	10.27	17.6129	63.6392	44	0	52	23	43	1	1	0	804
1	1	9.41273	1.63806	50.6389	117	114	2.58008	90623	154.65	17.5456	52.8317	24	0	53	22	46	1	1	1	630
2	1	9.41273	1.63806	50.6389	120	90	2.58008	90623	154.65	17.4992	52.7525	24	0	53	22	46	1	1	0	630
1	2	19.5181	1.58951	37.6366	91	79	3.12304	30904.8	316.63	17.4058	62.6939	22	0	51	19	32	1	0	0	797
1	2	9.27584	2.7469	50.834	98	79	3.04906	33159.1	130.08	17.4058	62.6939	22	0	51	19	32	1	1	0	797
2	2	19.5181	1.58951	37.6366	87	77	3.12304	30904.8	316.63	17.4058	62.6939	22	0	51	19	32	1	0	0	797
2	2	9.27584	2.7469	50.834	99	94	3.04906	33159.1	130.08	17.4058	62.6939	22	0	51	19	32	1	1	0	797
1	3	19.3676	1.77963	18.6655	83	85	2.66537	24385.6	11.41	17.7686	63.3492	26	1	50	21	29	1	0	0	148
1	3	9.3306	3.05339	42.4323	88	69	2.90332	24385.6	10.59	17.7686	63.3492	26	1	50	21	29	1	1	0	148
2	3	9.3306	3.05339	42.4323	90	71	2.90332	24385.6	10.59	17.7686	63.3492	26	1	50	21	29	1	1	0	148
1	2	9.68104	2.55967	6.09585	94	100	2.56914	32793	7.74	17.2878	70.9936	24	0	52	24	24.5	0	1	1	528
2	2	9.68104	2.55967	6.09585	105	123	2.56914	32793	7.74	17.2878	70.9936	24	0	52	24	24.5	0	1	0	528
1	7	9.10609	2.69928	2.36695	98	113	5.40112	112845	4.81	17.7963	58.6004	17	0	54	28	25	0	1	0	538
2	7	9.10609	2.69928	2.36695	98	116	5.40112	112845	4.81	17.7963	58.6004	17	0	54	28	25	0	1	0	538
1	2	20.6352	1.92533	12.1571	109	107	1.73846	20413	210.59	18.2458	61.1704	41	0	54	20	42	1	0	1	926
1	2	9.16085	3.12538	25.9428	112	100	1.8704	20413	195.73	18.2458	61.1704	41	0	54	20	42	1	1	1	926
2	2	20.5996	1.91424	12.1571	116	104	1.74325	20413	210.59	18.2458	61.1704	41	0	54	20	42	1	0	1	926
2	2	9.16085	3.12538	25.9428	105	99	1.8704	20413	195.73	18.2458	61.1704	41	0	54	20	42	1	1	1	926
1	2	19.8604	1.76751	9.7769	104	105	2.13403	27820.1	12.6	18.2912	61.2037	22	0	56	20	41	1	0	1	903
1	2	9.83984	3.11363	21.1801	79	109	2.39106	27820.1	11.88	18.2912	61.2037	22	0	56	20	41	1	1	1	903
2	2	20.0219	1.82373	9.7769	75	97	2.14296	27820.1	12.6	18.2912	61.2037	22	0	56	20	41	1	0	1	903
2	2	9.83984	3.11363	21.1801	89	88	2.39106	27820.1	11.88	18.2912	61.2037	22	0	56	20	41	1	1	1	903
1	2	10.6995	3.09027	31.4941	40	80	2.54056	25422.2	106.24	17.8706	61.2322	46	1	48	19	53	1	1	0	622
2	2	10.6995	3.09027	31.4941	54	82	2.54056	25422.2	106.24	17.8706	61.2322	46	1	48	19	53	1	1	0	622
1	1	9.1718	2.51131	7.45415	104	122	4.26761	119057	0.83	17.8422	56.2992	20	0	54	27	19	0	1	1	671
2	1	9.1718	2.51131	7.45415	104	100	4.26761	119057	0.83	17.6883	58.9971	20	0	54	27	19	0	1	1	671
1	2	9.62902	3.05259	37.258	102	97	2.70288	16793.1	118.24	17.6098	66.5867	18	0	54	23	21.5	1	1	1	469
2	2	9.62902	3.05259	37.258	100	80	2.70288	16793.1	118.24	17.6098	66.5867	18	0	54	23	21.5	1	1	1	469
1	2	10.9733	2.77757	55.1676	125	124	2.03361	19589.6	151.25	18.259	59.7021	75		48	15	32	1	1	1	682
2	2	10.9733	2.77757	55.1676	95	104	2.03361	19589.6	151.25	18.259	59.7021	75		48	15	32	1	1	0	682
1	1	19.321	1.5101	4.2563	114	112	4.7243	113503	7.1	17.6242	55.725	18	0	52	24	37	0	0	0	931
1	1	9.01848	2.62854	8.5753	89	98	5.1113	113503	6.56	17.6242	55.725	18	0	52	24	37	0	1	0	931
2	1	9.01848	2.62854	8.5753	99	99	5.1113	113503	6.56	17.6242	55.725	18	0	52	24	37	0	1	0	931
1	4	9.00205	2.72021	11.6593	101	104	3.20921	78819.5	34.87	17.3836	64.9953	31	0	53	22	29	0	1	1	605
2	4	9.00205	2.72021	11.6593	106	111	3.20921	78819.5	34.87	17.3836	64.9953	31	0	53	22	29	0	1	0	605
1	1	19.3511	1.53154	13.6623	130	124	3.51283	50167.7	33.66	17.7633	60.6231	23	0	55	24	29	0	0	1	475
1	1	9.02122	2.8812	56.193	131	134	4.01646	58965	62.85	17.7633	60.6231	23	0	55	24	29	0	1	1	475
2	1	19.3484	1.53154	13.6623	125	97	3.51283	50167.7	33.66	17.7633	60.6231	23	0	55	24	29	0	0	0	475
2	1	9.02122	2.8812	56.193	135	99	4.01646	58965	62.85	17.7633	60.6231	23	0	55	24	29	0	1	0	475
1	7	9.03217	2.888	28.9045	115	102	3.43701	33234.5	28.81	17.0325	68.7667	31	1	52	22	38	1	1	1	888
2	7	9.03217	2.888	28.9045	85	66	3.43701	33234.5	28.81	17.0325	68.7667	31	1	52	22	38	1	1	1	888
1	3	9.07598	3.03431	15.528	104	99	3.6614	55411.3	15.67	16.8683	71.5133	18	0	55	27	18	1	1	1	340
2	3	9.07598	3.03431	15.528	118	90	3.6614	55411.3	15.67	16.8683	71.5133	18	0	55	27	18	1	1	1	340
1	2	9.03765	2.98256	60.5979	77	101	3.60456	54736	106.62	17.6021	64.6771	20	0	54	12	36	1	1	0	577
2	2	9.03765	2.98256	60.5979	93	95	3.60456	54736	106.62	17.6021	64.6771	20	0	54	12	36	1	1	0	577
1	2	21.5797	1.98306	18.1404	79	92	1.84234	40684.7	4.16	17.2539	70.6094	31	0	53	21	32	1	0	1	835
1	2	9.72758	3.0042	43.552	85	72	2.25166	40684.7	3.86	17.2539	70.6094	31	0	53	21	32	1	1	1	835
2	2	21.5825	1.98306	18.1404	76	107	1.84234	40684.7	4.16	17.2539	70.6094	31	0	53	21	32	1	0	1	835
2	2	9.72758	3.0042	43.552	91	96	2.25166	40684.7	3.86	17.2539	70.6094	31	0	53	21	32	1	1	1	835
1	2	9.13895	2.62246	25.7323	66	86	2.30231	28967.2	82.17	16.8325	67.8892	19	0	54	20	28	1	1	0	581
2	2	9.13895	2.62246	25.7323	70	91	2.30231	28967.2	82.17	16.8325	67.8892	19	0	54	20	28	1	1	0	581
1	2	9.94935	3.08136	20.4418	95	77	2.11084	24759.9	17.83	17.8008	62.6352	20	0	57	28	34.5	1	1	1	632
2	2	9.94935	3.08136	20.4418	84	78	2.11084	24759.9	17.83	17.7498	62.6392	20	0	57	28	34.5	1	1	1	632
1	7	9.01027	2.92607	81.0845	119	126	2.41908	33761.5	94.17	17.6392	65.3925	24	1	55	28	52	1	1	1	320
2	7	9.01027	2.92607	81.0845	115	99	2.41908	33761.5	94.17	17.6392	65.3925	24	1	55	28	52	1	1	1	320
1	2	10.1109	3.1044	44.9348	71	64	2.27281	23790.4	72.38	17.8117	60.6428	39	0	58	22	40	1	1	0	785
2	2	10.1109	3.1044	44.9348	79	86	2.27281	23790.4	72.38	17.8117	60.6428	39	0	58	22	40	1	1	0	785
1	2	20.7118	1.6505	39.992	103	97	2.60732	33159.1	487.08	17.3285	61.4433	19	0	46	14	26	1	0	1	620
1	2	9.18001	2.73538	85.0722	91	98	3.1571	33159.1	498.68	17.3285	61.4433	19	0	46	14	26	1	1	1	620
2	2	20.7201	1.6505	39.992	99	110	2.60732	33159.1	487.08	17.3285	61.4433	19	0	46	14	26	1	0	0	620
2	2	9.18001	2.73538	85.0722	81	100	3.1571	33159.1	498.68	17.3285	61.4433	19	0	46	14	26	1	1	0	620
1	2	19.0637	1.65648	4.23985	79	83	2.8811	26025.7	11.46	18.2494	57.8358	17	0	55	23	23	1	0	1	88
1	2	9.11157	3.11889	38.6565	97	87	3.49397	59783.3	84.91	18.2494	57.8358	17	0	55	23	23	1	1	1	88
2	2	19.0554	1.65648	4.23985	101	79	2.8811	26025.7	11.46	18.2494	57.8358	17	0	55	23	23	1	0	0	88
2	2	9.11157	3.11889	38.6565	96	96	3.49397	59783.3	84.91	18.2494	57.8358	17	0	55	23	23	1	1	0	88
1	2	9.31691	2.92747	17.3011	94	108	3.4747	65788	15.49	17.795	61.0842	17	0	54	19	31	1	1	0	920
2	2	9.31691	2.92747	17.3011	76	96	3.4747	65788	15.49	17.795	61.0842	17	0	54	19	31	1	1	0	920
1	1	19.0335	1.72067	10.3468	120	111	2.78561	71263.3	48.34	16.5081	67.494						0	0	0	237
2	1	19.0719	1.74905	10.3468	121	112	2.801	71263.3	48.34	16.5081	67.494						0	0	0	237
1	2	9.91376	2.56113	77.621	128	120	2.75888	42514.5	63.26	16.8204	50.651	21	0	57	21	24.5	1	1	0	191
2	2	9.91376	2.56113	77.621	123	114	2.75888	42514.5	63.26	16.8204	50.651	21	0	57	21	24.5	1	1	0	191
1	2	19.2526	1.71468	13.0664	104	105	3.7837	75323.3	15.88	18.0142	60.4081	16	0	58	25	27	1	0	0	213
1	2	9.15811	2.95987	26.4368	106	108	3.87365	75323.3	14.75	18.0142	60.4081	16	0	58	25	27	1	1	0	213
2	2	19.2526	1.71468	13.0664	110	106	3.7837	75323.3	15.88	18.0142	60.4081	16	0	58	25	27	1	0	0	213
2	2	9.15811	2.95987	26.4368	96	117	3.87365	75323.3	14.75	18.0142	60.4081	16	0	58	25	27	1	1	0	213
1	7	9.06502	2.71347	25.1402	78	60	2.50285	31029.8	9.94	16.8475	67.9067	27		52	21	29	1	1	1	701
2	7	9.06502	2.71347	25.1402	54	69	2.50285	31029.8	9.94	16.8475	67.9067	27		52	21	29	1	1	0	701
1	2	9.38261	2.98032	47.3113	74	75	2.03174	30946	4.74	17.6533	63.7371	18	0	57	28	21	1	1	0	723
2	2	9.38261	2.98032	47.3113	84	89	2.03174	30946	4.74	17.6533	63.7371	18	0	57	28	21	1	1	0	723
1	2	9.08145	2.92742	54.7771	97	77	2.7324	39928.7	30.41	18.0929	61.6608	22	0	55	28	32	0	1	1	500
2	2	9.08145	2.92742	54.7771	97	75	2.7324	39928.7	30.41	18.0929	61.6608	22	0	55	28	32	0	1	0	500
1	7	10.3436	2.97949	18.7829	98	81	2.36252	20891.4	117.58	17.1529	67.3012	32	0			25	1	1	1	613
2	7	10.3436	2.97949	18.7829	115	110	2.36252	20891.4	117.58	17.1529	67.3012	32	0			25	1	1	1	613
1	7	9.03217	2.71487	60.5363	70	119	2.53199	43461	58.71	17.3678	68.6603	43	1	53	26	42	1	1	1	929
2	7	9.03217	2.71487	60.5363	110	110	2.53199	43461	58.71	17.3678	68.6603	43	1	53	26	42	1	1	1	929
1	2	9.47023	2.91112	54.2208	87	92	2.5589	52157.9	105.35	17.7142	60.5373	26	0	56	28	38	1	1	0	151
2	2	9.47023	2.91112	54.2208	101	75	2.5589	52157.9	105.35	17.7142	60.5373	26	0	56	28	38	1	1	0	151
1	2	19.3867	1.80888	15.8921	98	99	2.32303	17988	89.01	17.8127	62.6775	28	0	55	21	34	1	0	0	857
1	2	9.47023	3.04679	33.7325	100	83	2.44329	17988	82.72	17.8127	62.6775	28	0	55	21	34	1	1	0	857
2	2	19.4031	1.80888	15.8921	122	92	2.32303	17988	89.01	17.8127	62.6775	28	0	55	21	34	1	0	0	857
2	2	9.47023	3.04679	33.7325	114	109	2.44329	17988	82.72	17.8127	62.6775	28	0	55	21	34	1	1	0	857
1	2	9.04312	2.99041	22.2924	85	73	2.20547	33455.1	49.23	17.63	67.1933	28	0	50	13	25	0	1	1	884
2	2	9.04312	2.99041	22.2924	87	96	2.20547	33455.1	49.23	17.63	67.1933	28	0	50	13	25	0	1	1	884
1	2	19.1622	1.07001	3.82185	106	104	1.64787	50481.1	14.92	17.1456	40.2306	18	0	34	5	40.5	0	0	0	18
1	2	9.04038	1.82816	5.31665	103	110	1.58753	52653.6	4.27	17.1456	40.2306	18	0	34	5	40.5	0	1	0	18
2	2	9.04038	1.82816	5.31665	100	96	1.58753	52653.6	4.27	17.1456	40.2306	18	0	34	5	40.5	0	1	0	18
1	4	19.6413	1.66948	8.8656	101	100	4.11874	70265.9	33.07	18.0217	61.6523	19	0	54	27	40	1	0	1	487
1	4	9.44832	2.87753	20.1343	106	101	4.40952	70265.9	30.74	18.0217	61.6523	19	0	54	27	40	1	1	1	487
2	4	19.6413	1.66948	8.8656	113	105	4.11874	70265.9	33.07	18.0217	61.6523	19	0	54	27	40	1	0	0	487
2	4	9.44832	2.87753	20.1343	103	116	4.40952	70265.9	30.74	18.0217	61.6523	19	0	54	27	40	1	1	0	487
1	2	9.72758	2.9347	68.9412	103	97	2.59045	41280.4	115.46	16.9378	69.3881	19	0	50	24	27	0	1	1	345
2	2	9.72758	2.9347	68.9412	113	80	2.59045	41280.4	115.46	16.9378	69.3881	19	0	50	24	27	0	1	1	345
1	2	9.83162	3.02121	16.1593	68	74	2.74568	24490.7	77.71	17.806	62.5633	18	0	54		16.5	1	1	1	935
2	2	9.83162	3.02121	16.1593	81	103	2.74568	24490.7	77.71	17.806	62.5633	18	0	54		16.5	1	1	1	935
1	2	9.17728	3.03803	53.0361	97	96	1.81189	22898.2	34.12	17.6658	61.7242	58	0	54	28	49	0	1	1	89
2	2	9.17728	3.03803	53.0361	93	72	1.81189	22898.2	34.12	17.6971	62.1254	58	0	54	28	49	0	1	0	89
1	1	9.34428	2.97582	12.4924	108	102	3.70246	96839.6	70.37	18.1554	59.7067	25	0	56	29	22	0	1	0	125
2	1	9.34428	2.97582	12.4924	102	102	3.70246	96839.6	70.37	18.1554	59.7067	25	0	56	29	22	0	1	0	125
1	3	9.08966	2.75378	32.319	88	70	4.15206	26667.5	84.36	16.449	51.3796	29	0	54	23	26.5	1	1	0	523
2	3	9.08966	2.75378	32.319	107	80	4.15206	26667.5	84.36	16.4312	51.2115	29	0	54	23	26.5	1	1	0	523
1	2	20.7201	1.88235	12.1152	102	118	2.37907	40980.8	125.59	16.9346	65.5067	18	0	56	20	31	0	0	0	127
1	2	9.48665	2.92772	27.2099	99	107	2.51411	40980.8	116.72	16.9346	65.5067	18	0	56	20	31	0	1	0	127
2	2	20.7201	1.88235	12.1152	110	106	2.37907	40980.8	125.59	16.9346	65.5067	18	0	56	20	31	0	0	0	127
2	2	9.48665	2.92772	27.2099	86	98	2.51411	40980.8	116.72	16.9346	65.5067	18	0	56	20	31	0	1	0	127
1	1	9.10609	2.82725	22.0254	139	111	3.70653	51405.2	16.46	18.354	60.0656	36	0	56	27	22.5	0	1	0	585
2	1	9.10609	2.82725	22.0254	136	125	3.70653	51405.2	16.46	18.354	60.0656	36	0	56	27	22.5	0	1	0	585
1	7	9.05681	2.38777	3.8879	96	74	3.16521	79273	11.68	17.1481	69.0117	17	0	55	18	28	0	1	0	426
2	7	9.05681	2.38777	3.8879	102	87	3.16521	79273	11.68	17.1481	69.0117	17	0	55	18	28	0	1	0	426
1	2	9.56605	2.74289	31.5812	110	109	2.73217	45606.3	10.15	18.3521	58.4208	17	0	46	17	26	0	1	1	305
2	2	9.56605	2.74289	31.5812	113	105	2.73217	45606.3	10.15	18.31	61.7525	17	0	46	17	26	0	1	0	305
1	4	9.28405	2.99568	49.162	100	118	2.82078	41221.1	104.33	17.3717	63.4075	33	0	49	20	35	0	1	1	510
2	4	9.28405	2.99568	49.162	83	131	2.82078	41221.1	104.33	17.3717	63.4075	33	0	49	20	35	0	1	1	510
1	1	10.883	2.98877	15.3551	125	131	4.32761	35474.9	49.15	18.4221	60.3979	25	0	55	27	25	0	1	0	279
2	1	10.883	2.98877	15.3551	140	129	4.32761	35474.9	49.15	18.4221	60.3979	25	0	55	27	25	0	1	0	279
1	1	10.6475	2.77663	7.5599	146	125	4.52948	46721.8	7.33	18.0646	60.6902	22	0	57	27	23.5	0	1	1	798
2	1	20.5257	1.69841	2.7318	131	119	4.67701	119654	12.5	18.0646	60.6902	22	0	57	27	23.5	0	0	0	798
2	1	10.6475	2.77663	7.5599	139	110	4.52948	46721.8	7.33	18.0646	60.6902	22	0	57	27	23.5	0	1	0	798
1	1	10.9185	2.75461	23.5153	102	96	3.26899	53148.4	18.29	18.2233	62.7514	17	0	54	27	21	0	1	0	208
2	1	10.9185	2.75461	23.5153	108	96	3.26899	53148.4	18.29	18.2233	62.7514	17	0	54	27	21	0	1	0	208
1	2	9.02122	2.77209	23.5124	76	97	2.26669	27187.3	10.76	18.2029	63.8738	38	0	51	25	31	1	1	1	96
2	2	9.02122	2.77209	23.5124	85	69	2.26669	27187.3	10.76	18.4192	61.7453	38	0	51	25	31	1	1	1	96
1	1	20.5421	1.71916	6.75775	127	113	3.87076	101136	28.83	17.874	57.5992	22	0	55	28	38	0	0	1	671
1	1	10.6229	2.93412	14.0773	113	104	3.85143	101136	25.82	17.874	57.5992	22	0	55	28	38	0	1	1	671
2	1	10.6229	2.93412	14.0773	83	108	3.85143	101136	25.82	17.874	57.5992	22	0	55	28	38	0	1	1	671
1	1	10.7159	2.91274	37.8579	124	108	3.06866	68901.4	129.13	16.6067	71.4733	22	1	56	25	33	0	1	1	186
2	1	10.7159	2.91274	37.8579	136	113	3.06866	68901.4	129.13	16.6067	71.4733	22	1	56	25	33	0	1	0	186
1	7	20.2984	1.66484	14.5647	76	71	2.69733	50763.1	4.57	17.7992	64.0806	26	0	55	26	24	0	0	1	149
1	7	10.1629	2.83976	32.7627	50	68	3.33946	42411.2	92.12	17.7992	64.0806	26	0	55	26	24	0	1	1	149
2	7	10.1629	2.83976	32.7627	62	115	3.33946	42411.2	92.12	17.7992	64.0806	26	0	55	26	24	0	1	1	149
1	7	9.10335	3.01196	31.5651	68	100	2.01297	26747.1	212.82	17.8658	61.8383	23	0	52	23	19	1	1	1	386
2	7	9.10335	3.01196	31.5651	85	103	2.01297	26747.1	212.82	17.8658	61.8383	23	0	52	23	19	1	1	1	386
1	1	9.70021	2.29276	9.47635	123	105	2.14116	45999.8	7.24	17.1367	55.0253	20	0	53	21	18	0	1	0	648
2	1	9.70021	2.29276	9.47635	125	117	2.14116	45999.8	7.24	17.1367	55.0253	20	0	53	21	18	0	1	0	648
1	1	9.42916	2.67073	16.2237	112	124	2.32354	48437.5	58.26	16.3871	66.5579	33	0	55	28	35	0	1	1	951
2	1	9.42916	2.67073	16.2237	125	98	2.32354	48437.5	58.26	16.3871	66.5579	33	0	55	28	35	0	1	0	951
1	2	19.2663	1.65552	27.6071	101	116	2.15515	43461	85.32	17.4229	69.6677	34	0	55	27	33	1	0	1	251
1	2	9.02396	2.71429	58.7824	101	105	2.25976	43461	79.31	17.4229	69.6677	34	0	55	27	33	1	1	1	251
2	2	19.2307	1.69914	27.6071	107	125	2.1658	43461	85.32	17.4229	69.6677	34	0	55	27	33	1	0	1	251
2	2	9.02396	2.71429	58.7824	96	132	2.25976	43461	79.31	17.4229	69.6677	34	0	55	27	33	1	1	1	251
1	3	19.0828	1.97936	8.99615	101	102	2.45831	37620.9	57.77	16.9517	69.8158	29	0	48	23	25	1	0	1	274
1	3	9.01848	2.75611	43.0808	120	97	2.6665	66145.8	53.47	16.9517	69.8158	29	0	48	23	25	1	1	1	274
2	3	19.0883	1.97936	8.99615	91	84	2.45831	37620.9	57.77	16.9517	69.8158	29	0	48	23	25	1	0	0	274
2	3	9.01848	2.75611	43.0808	84	115	2.6665	66145.8	53.47	16.9517	69.8158	29	0	48	23	25	1	1	0	274
1	3	9.02122	3.01307	23.5389	91	71	2.63354	30506	9.06	18.0413	60.3935	19	0	52	20	39	1	1	1	705
2	3	9.02122	3.01307	23.5389	96	95	2.63354	30506	9.06	18.0413	60.3935	19	0	52	20	39	1	1	0	705
1	7	19.1431	1.69375	45.2777	114	97	2.75095	52157.9	131.68	17.6894	62.4777	21	0	53	23	18.5	0	0	1	388
1	7	9.07598	2.89608	97.6826	119	76	2.79785	52157.9	133.39	17.6894	62.4777	21	0	53	23	18.5	0	1	1	388
2	7	19.1403	1.69375	45.2777	131	120	2.75095	52157.9	131.68	17.6894	62.4777	21	0	53	23	18.5	0	0	0	388
2	7	9.07598	2.89608	97.6826	138	120	2.79785	52157.9	133.39	17.6894	62.4777	21	0	53	23	18.5	0	1	0	388
1	1	20.3121	1.81572	13.7212	104	120	2.33067	44213.7	65.48	17.5075	61.1521	18	0	47	18	43	0	0	0	392
1	1	9.04312	2.82934	28.5778	105	129	2.72393	44213.7	60.86	17.5075	61.1521	18	0	47	18	43	0	1	0	392
2	1	20.1807	1.78724	13.7212	107	119	2.33341	44213.7	65.48	17.5075	61.1521	18	0	47	18	43	0	0	0	392
2	1	9.04312	2.82934	28.5778	98	123	2.72393	44213.7	60.86	17.5075	61.1521	18	0	47	18	43	0	1	0	392
1	2	19.7837	1.77636	25.9153	112	92	2.19775	27159.6	64.55	17.7885	61.9021	54	0	54	24	19.5	0	0	1	205
1	2	10.13	3.05163	55.5827	95	101	2.28035	27159.6	60	17.7885	61.9021	54	0	54	24	19.5	0	1	1	205
2	2	19.7837	1.77636	25.9153	107	97	2.19775	27159.6	64.55	17.7885	61.9021	54	0	54	24	19.5	0	0	1	205
2	2	10.13	3.05163	55.5827	104	102	2.28035	27159.6	60	17.7885	61.9021	54	0	54	24	19.5	0	1	1	205
1	7	19.1239	1.7269	8.70975	115	112	2.01896	33028.9	9.02	18.1525	61.104	27	0	54	24	44	1	0	1	209
1	7	9.12526	2.93794	20.2471	111	107	2.23844	33028.9	8.38	18.1525	61.104	27	0	54	24	44	1	1	1	209
2	7	19.1211	1.7269	8.70975	103	117	2.01896	33028.9	9.02	18.1525	61.104	27	0	54	24	44	1	0	1	209
2	7	9.12526	2.93794	20.2471	104	111	2.23844	33028.9	8.38	18.1525	61.104	27	0	54	24	44	1	1	1	209
1	4	20.345	1.56558	8.6405	113	124	3.18287	65730.2	83.71	18.2983	58.9106	20	0	47	20	35	0	0	0	206
1	4	10.2423	2.78675	18.9392	111	140	3.45618	65730.2	77.81	18.2983	58.9106	20	0	47	20	35	0	1	0	206
2	4	20.1095	1.59697	8.6405	123	114	3.2262	65730.2	83.71	18.2983	58.9106	20	0	47	20	35	0	0	0	206
2	4	10.2423	2.78675	18.9392	110	124	3.45618	65730.2	77.81	18.2983	58.9106	20	0	47	20	35	0	1	0	206
1	1	10.7269	2.88506	73.1198	83	120	2.80151	47982	136	17.8419	66.7085	37	0	54	24	45	0	1	0	514
2	1	10.7269	2.88506	73.1198	97	121	2.80151	47982	136	17.8419	66.7085	37	0	54	24	45	0	1	0	514
1	3	9.04586	2.92858	38.4731	78	74	2.58071	18294.7	11.04	16.7942	70.4671	38	0	52	18	30	0	1	1	530
2	3	9.04586	2.92858	38.4731	90	88	2.58071	18294.7	11.04	16.7942	70.4671	38	0	52	18	30	0	1	1	530
1	2	10.809	2.9935	27.1257	64	101	2.59445	47399.6	27.64	17.2354	67.1362	19	0	43	9	38	1	1	1	872
2	2	10.809	2.9935	27.1257	80	93	2.59445	47399.6	27.64	17.5889	64.8247	19	0	43	9	38	1	1	0	872
1	1	19.3648	1.64779	4.5236	116	115	2.62008	114026	0.56	17.7425	67.1908	18	0	55	27	25	0	0	0	66
1	1	9.25941	2.75552	10.1646	120	126	2.76884	114026	0.51	17.7425	67.1908	18	0	55	27	25	0	1	0	66
2	1	9.25941	2.75552	10.1646	105	94	2.76884	114026	0.51	17.7425	67.1908	18	0	55	27	25	0	1	0	66
1	1	20.2656	0.724956	3.35045	94	104	2.50688	45587.2	27.44	16.7169	69.2352	23	0	53	21	27	0	0	1	693
1	1	10.1054	2.71031	18.3294	99	90	3.1418	75878.9	46.19	16.7169	69.2352	23	0	53	21	27	0	1	1	693
2	1	20.3943	0.639009	3.35045	109	107	2.47993	45587.2	27.44	16.7169	69.2352	23	0	53	21	27	0	0	1	693
2	1	10.1054	2.71031	18.3294	107	103	3.1418	75878.9	46.19	16.7169	69.2352	23	0	53	21	27	0	1	1	693
1	7	9.13895	2.75131	22.8864	114	89	4.44897	35177.6	50.42	16.6198	51.3092	32	0	56	27	28	0	1	0	923
2	7	9.13895	2.75131	22.8864	114	99	4.44897	35177.6	50.42	16.4436	48.9036	32	0	56	27	28	0	1	0	923
1	1	9.15811	2.7499	7.26045	126	120	5.56159	184858	5.01	16.65	63.17	17	0	57	25	33	0	1	0	539
2	1	9.15811	2.7499	7.26045	119	114	5.56159	184858	5.01	16.6487	63.4546	17	0	57	25	33	0	1	0	539
1	7	9.07598	2.35881	22.9039	105	96	2.84842	45095	88.06	16.905	56.6775	33	0	53	28	43.5	0	1	1	348
2	7	9.07598	2.35881	22.9039	93	72	2.84842	45095	88.06	16.905	56.6775	33	0	53	28	43.5	0	1	0	348
1	3	9.24298	2.80151	56.2189	121	86	3.36543	29255.5	57.34	16.5183	49.8136	17	0	47	14	37	0	1	0	146
2	3	9.24298	2.80151	56.2189	113	102	3.36543	29255.5	57.34	16.5183	49.8136	17	0	47	14	37	0	1	0	146
1	1	9.06229	2.16308	3.25255	116	113	3.30606	70413	0.25	17.1979	57.2165	26	0	54	21	24	0	1	0	955
2	1	19.2115	1.33746	0.15715	115	108	5.30131	102904	0.24	17.1979	57.2165	26	0	54	21	24	0	0	0	955
2	1	9.06229	2.16308	3.25255	115	118	3.30606	70413	0.25	17.1979	57.2165	26	0	54	21	24	0	1	0	955
1	3	19.2717	1.6905	26.97	115	87	2.66033	43740	100.1	17.2903	68.8536	17	0	48	18	22.5	0	0	0	538
1	3	9.01848	2.79548	54.7752	97	98	2.48966	43740	93.04	17.2903	68.8536	17	0	48	18	22.5	0	1	0	538
2	3	9.01848	2.79548	54.7752	100	95	2.48966	43740	93.04	17.1592	69.2338	17	0	48	18	22.5	0	1	0	538
1	2	9.35797	3.01197	35.2337	97	107	2.32096	24817.2	160.68	17.6954	61.7225	29	0	49	23	55	0	1	0	263
2	2	9.35797	3.01197	35.2337	86	105	2.32096	24817.2	160.68	17.6954	61.7225	29	0	49	23	55	0	1	0	263
1	2	9.92471	2.62429	46.5598	102	87	2.40827	25546.2	100.9	17.1975	67.8917	32	0	52	24	19	1	1	1	296
2	2	9.92471	2.62429	46.5598	87	95	2.40827	25546.2	100.9	17.1975	67.8917	32	0	52	24	19	1	1	1	296
1	3	9.3963	2.92038	58.2169	79	84	2.55885	34377.1	29.4	16.59	72.7692	28	0	50	19	31	0	1	1	243
2	3	9.3963	2.92038	58.2169	75	79	2.55885	34377.1	29.4	16.59	72.7692	28	0	50	19	31	0	1	1	243
1	7	10.0123	2.67427	26.3376	103	96	2.46124	38604.7	16.49	17.005	69.4433	30	0	49	19	27	0	1	0	184
2	7	10.0123	2.67427	26.3376	88	81	2.46124	38604.7	16.49	17.005	69.4433	30	0	49	19	27	0	1	0	184
1	2	9.11157	2.59959	60.0018	90	119	2.54415	42985.9	69.29	16.1053	53.9931	18	0	53	25	28	1	1	1	348
2	2	9.11157	2.59959	60.0018	95	121	2.54415	42985.9	69.29	15.8046	52.7262	18	0	53	25	28	1	1	1	348
1	7	9.11431	2.80488	21.0877	96	106	2.87368	48437.5	205.67	16.6789	66.5689	29	0	40	15	29.5	1	1	1	309
2	7	9.11431	2.80488	21.0877	58	103	2.87368	48437.5	205.67	16.6789	66.5689	29	0	40	15	29.5	1	1	1	309
1	2	20.4435	1.70412	27.8175	117	121	2.55566	47982	63.55	17.8	63.8371	17	0	55	27	41	1	0	1	73
1	2	10.7488	2.82183	47.8545	94	98	2.92681	38740.4	89.49	17.8	63.8371	17	0	55	27	41	1	1	1	73
2	2	20.4408	1.70412	27.8175	95	111	2.55566	47982	63.55	17.8	63.8371	17	0	55	27	41	1	0	1	73
2	2	10.7488	2.82183	47.8545	94	92	2.92681	38740.4	89.49	17.8	63.8371	17	0	55	27	41	1	1	1	73
1	2	20.4353	1.59372	9.0819	109	91	2.89829	37843.9	74.8	17.2772	58.9769	21	0	51	19	21.5	1	0	1	124
1	2	9.04038	2.59632	25.4048	100	89	3.74725	50167.7	17.98	17.2772	58.9769	21	0	51	19	21.5	1	1	1	124
2	2	20.4381	1.59372	9.0819	105	118	2.89829	37843.9	74.8	17.2772	58.9769	21	0	51	19	21.5	1	0	1	124
2	2	9.04038	2.59632	25.4048	108	91	3.74725	50167.7	17.98	17.2772	58.9769	21	0	51	19	21.5	1	1	1	124
1	3	9.68652	2.6672	85.6668	108	100	2.56381	28301.2	454.18	17.0258	72.9783	23	0	50	17	22	1	1	1	132
2	3	9.68652	2.6672	85.6668	119	81	2.56381	28301.2	454.18	17.0258	72.9783	23	0	50	17	22	1	1	0	132
1	7	19.4278	1.77321	52.3668	94	99	3.02232	32383.1	596.38	17.256	69.3671	18	0	46	17	22.5	0	0	1	638
1	7	9.44011	2.82881	109.596	103	82	3.09127	32383.1	573.54	17.256	69.3671	18	0	46	17	22.5	0	1	1	638
2	7	19.4278	1.77321	52.3668	121	99	3.02232	32383.1	596.38	17.256	69.3671	18	0	46	17	22.5	0	0	1	638
2	7	9.44011	2.82881	109.596	108	94	3.09127	32383.1	573.54	17.256	69.3671	18	0	46	17	22.5	0	1	1	638
1	1	19.206	1.65888	24.791	115	123	4.08872	35725.3	102.86	17.0496	69.0496	38	1	54	21	34.5	1	0	1	887
1	1	9.0486	2.73941	53.0191	100	118	4.19922	35725.3	95.61	17.0496	69.0496	38	1	54	21	34.5	1	1	1	887
2	1	19.2827	1.65407	24.791	116	108	4.03872	35725.3	102.86	17.0496	69.0496	38	1	54	21	34.5	1	0	1	887
2	1	9.0486	2.73941	53.0191	112	122	4.19922	35725.3	95.61	17.0496	69.0496	38	1	54	21	34.5	1	1	1	887
1	2	10.2669	2.84195	37.934	93	92	3.19348	52332	42.5	17.7467	52.6056	20	0	50	20	28	1	1	1	472
2	2	10.2669	2.84195	37.934	98	107	3.19348	52332	42.5	17.7467	52.6056	20	0	50	20	28	1	1	1	472
1	1	20.7392	1.87806	22.6158	129	106	3.02841	36977	135.64	16.7494	69.48	29	0	55	27	24.5	0	0	1	331
1	1	9.4538	2.80589	48.5733	104	104	3.00502	36977	126.08	16.7494	69.48	29	0	55	27	24.5	0	1	1	331
2	1	20.7392	1.87806	22.6158	123	114	3.02841	36977	135.64	16.7494	69.48	29	0	55	27	24.5	0	0	1	331
2	1	9.4538	2.80589	48.5733	133	113	3.00502	36977	126.08	16.7494	69.48	29	0	55	27	24.5	0	1	1	331
1	2	9.47844	2.60186	46.0262	118	116	2.53214	23932.5	134.07	17.2083	69.5531	45	0	53	28	30	1	1	1	946
2	2	9.47844	2.60186	46.0262	105	93	2.53214	23932.5	134.07	17.2083	69.5531	45	0	53	28	30	1	1	1	946
1	3	10.6146	2.58085	37.0583	100	90	2.17338	23342.5	81.53	17.4919	68.2842	23	0	50	20	52	0	1	0	153
2	3	10.6146	2.58085	37.0583	106	77	2.17338	23342.5	81.53	17.4919	68.2842	23	0	50	20	52	0	1	0	153
1	3	9.12799	3.06595	50.7909	101	97	1.94095	14207.8	162.23	17.6617	61.9142	47	0	50	19	46	0	1	1	891
2	3	9.12799	3.06595	50.7909	88	99	1.94095	14207.8	162.23	17.6617	61.9142	47	0	50	19	46	0	1	1	891
1	7	19.0363	1.44146	14.1785	110	95	4.16687	75033.8	55.09	18.3814	60.1811	20	0	54	28	20	0	0	1	922
1	7	9.07598	2.70288	29.2223	106	108	4.45624	75033.8	51.2	18.3814	60.1811	20	0	54	28	20	0	1	1	922
2	7	19.0226	1.44146	14.1785	118	101	4.16687	75033.8	55.09	18.3753	60.1942	20	0	54	28	20	0	0	1	922
2	7	9.07598	2.70288	29.2223	110	100	4.45624	75033.8	51.2	18.3753	60.1942	20	0	54	28	20	0	1	1	922
1	2	9.13347	2.61935	31.2168	63	80	2.28507	24178.1	85.17	16.9692	71.0342	23	0	42	17	41	1	1	1	709
2	2	9.13347	2.61935	31.2168	56	82	2.28507	24178.1	85.17	16.9692	71.0342	23	0	42	17	41	1	1	0	709
1	7	9.38535	2.6898	65.4581	83	77	2.61296	40221.8	53.89	17.0498	70.0069	41	0	52	24	29	0	1	1	697
2	7	9.38535	2.6898	65.4581	95	93	2.61296	40221.8	53.89	17.0498	70.0069	41	0	52	24	29	0	1	1	697
1	1	10.4175	2.76721	26.5235	89	96	3.58458	67005.9	17.68	17.1179	70.625	21	0	56	28	37	0	1	1	340
2	1	10.4175	2.76721	26.5235	86	114	3.58458	67005.9	17.68	17.1179	70.625	21	0	56	28	37	0	1	1	340
1	3	9.02396	3.02092	64.4327	107	80	2.60081	25010.3	758.95	18.036	60.5896	23	0	55	25	44.5	1	1	0	242
2	3	19.165	1.66583	6.7764	116	90	3.10409	38878.4	6.93	18.036	60.5896	23	0	55	25	44.5	1	0	0	242
2	3	9.02396	3.02092	64.4327	124	101	2.60081	25010.3	758.95	18.036	60.5896	23	0	55	25	44.5	1	1	0	242
1	1	10.1355	2.71307	87.3987	97	95	2.46286	61284.6	187.37	16.9692	71.0342	21	0			33	0	1	0	625
2	1	10.1355	2.71307	87.3987	109	92	2.46286	61284.6	187.37	16.9692	71.0342	21	0			33	0	1	0	625
1	3	10.256	2.62461	39.3654	93	98	2.16602	23342.5	76.52	16.98	54.1327	37	0	49	19	25.5	1	1	0	873
2	3	20.0082	1.05404	0.55085	88	119	1.42496	33729	0.53	16.98	54.1327	37	0	49	19	25.5	1	0	0	873
2	3	10.256	2.62461	39.3654	88	99	2.16602	23342.5	76.52	16.98	54.1327	37	0	49	19	25.5	1	1	0	873
1	2	9.15264	3.03866	43.4833	86	78	2.10439	24045.4	521.07	18.4125	60.5594	28	0	53	25	33.8333	1	1	0	451
2	2	9.15264	3.03866	43.4833	102	105	2.10439	24045.4	521.07	18.2956	59.8558	28	0	53	25	33.8333	1	1	0	451
1	3	10.5161	2.77801	52.1981	92	101	2.68667	31054.9	97.35	16.9692	71.0342	32	0	52	24	19	1	1	1	325
2	3	10.5161	2.77801	52.1981	107	107	2.68667	31054.9	97.35	16.9692	71.0342	32	0	52	24	19	1	1	0	325
1	7	10.1054	2.54751	14.9701	102	95	1.4675	83141	73.32	16.9692	71.0342	20	0	54	27	21	0	1	1	647
2	7	10.1054	2.54751	14.9701	114	86	1.4675	83141	73.32	16.9692	71.0342	20	0	54	27	21	0	1	0	647
1	3	9.4757	2.67105	101.929	83	78	3.09735	37855.7	237.44	16.9692	71.0342	25	0	44	7	39	1	1	1	742
2	3	9.4757	2.67105	101.929	91	77	3.09735	37855.7	237.44	16.9692	71.0342	25	0	44	7	39	1	1	0	742
1	7	9.06502	2.72474	10.7362	112	114	2.88067	114026	2.96	17.7778	68.0017	20	0	55	23	23	0	1	1	284
2	7	9.06502	2.72474	10.7362	109	107	2.88067	114026	2.96	17.7778	68.0017	20	0	55	23	23	0	1	1	284
1	2	9.43737	2.46091	28.9847	105	107	2.15803	19137.8	92.56	17.0858	70.4177	24	0	50	21	37	1	1	0	983
2	2	9.43737	2.46091	28.9847	121	68	2.15803	19137.8	92.56	17.0858	70.4177	24	0	50	21	37	1	1	0	983
1	7	19.54	1.66399	12.8313	105	114	3.1608	65615.2	62.81	17.0238	68.794	32	0	51	24	34.5	0	0	1	85
1	7	9.18001	2.74951	28.7002	81	111	3.26691	65615.2	58.38	17.0238	68.794	32	0	51	24	34.5	0	1	1	85
2	7	19.6742	1.73485	12.8313	96	105	3.17226	65615.2	62.81	16.9938	68.88	32	0	51	24	34.5	0	0	1	85
2	7	9.18001	2.74951	28.7002	97	105	3.26691	65615.2	58.38	16.9938	68.88	32	0	51	24	34.5	0	1	1	85
1	1	9.99316	2.59506	27.6374	126	99	3.29745	41628	151.18	17.3575	71.695	37	0	54	18	20	0	1	1	186
2	1	9.99316	2.59506	27.6374	103	96	3.29745	41628	151.18	17.3575	71.695	37	0	54	18	20	0	1	1	186
1	3	10.0643	2.68624	52.2253	93	97	1.58619	43461	77.15	17.1562	70.0421	30	0	52	22	27	0	1	1	179
2	3	10.0643	2.68624	52.2253	97	99	1.58619	43461	77.15	17.1562	70.0421	30	0	52	22	27	0	1	1	179
1	2	20.0931	1.44732	8.5834	84	111	2.56641	60696.9	74.47	17.4971	52.5977	39	0	55	22	38	0	0	0	579
1	2	9.11157	2.33208	18.3064	95	102	2.6206	32464.7	75.45	17.4971	52.5977	39	0	55	22	38	0	1	0	579
2	2	20.0821	1.44732	8.5834	63	87	2.56641	60696.9	74.47	17.4971	52.5977	39	0	55	22	38	0	0	0	579
2	2	9.11157	2.33208	18.3064	90	86	2.6206	32464.7	75.45	17.4971	52.5977	39	0	55	22	38	0	1	0	579
1	7	9.05955	2.88393	94.1248	77	88	2.55892	24167.5	216.45	16.5533	72.74	66	1	52	19	39	1	1	1	223
2	7	9.05955	2.88393	94.1248	98	82	2.55892	24167.5	216.45	16.5533	72.74	66	1	52	19	39	1	1	0	223
1	7	19.7454	1.74236	5.31045	113	118	3.1572	77061.2	34.88	17.9406	57.1415	20	0	55	27	33	0	0	0	689
1	7	10.0151	2.18036	16.0735	90	109	4.13999	91132.9	51.88	17.9406	57.1415	20	0	55	27	33	0	1	0	689
2	7	19.7481	1.7411	5.31045	104	123	3.15584	77061.2	34.88	17.9406	57.1415	20	0	55	27	33	0	0	0	689
2	7	10.0151	2.18036	16.0735	87	116	4.13999	91132.9	51.88	17.9406	57.1415	20	0	55	27	33	0	1	0	689
1	2	9.05681	2.59281	29.8112	79	76	2.09092	19137.8	78.47	17.1621	70.6179	38	0	47	20	38	1	1	1	863
2	2	9.05681	2.59281	29.8112	64	91	2.09092	19137.8	78.47	17.8388	61.1296	38	0	47	20	38	1	1	1	863
1	2	9.10062	3.03135	17.585	117	119	2.52765	46599.8	14.66	17.8271	60.6742	20	0	50	24	31.5	1	1	1	728
2	2	9.10062	3.03135	17.585	96	97	2.52765	46599.8	14.66	17.8271	60.6742	20	0	50	24	31.5	1	1	1	728
1	7	9.1499	2.3103	6.60125	101	96	2.4305	39811.1	36.42	16.614	68.764	22	0	53	25	44	1	1	0	299
2	7	19.1704	1.71003	18.0244	91	88	1.67331	30840.4	160.72	16.614	68.764	22	0	53	25	44	1	0	0	299
2	7	9.1499	2.3103	6.60125	104	72	2.4305	39811.1	36.42	16.614	68.764	22	0	53	25	44	1	1	0	299
1	2	10.0151	2.61389	42.3238	96	104	2.68924	48753.2	102.75	16.7283	70.8767	21	0	52	23	18	0	1	1	872
2	2	10.0151	2.61389	42.3238	107	98	2.68924	48753.2	102.75	16.7283	70.8767	21	0	52	23	18	0	1	1	872
1	2	20.0383	1.90469	7.14815	81	76	2.10577	18675.1	8.74	16.5148	67.5119	38	0	50	25	32	1	0	1	784
1	2	9.05681	2.94057	15.4733	72	76	2.344	18675.1	8.12	16.5148	67.5119	38	0	50	25	32	1	1	1	784
2	2	20.0411	1.90469	7.14815	91	75	2.10577	18675.1	8.74	16.5148	67.5119	38	0	50	25	32	1	0	1	784
2	2	9.05681	2.94057	15.4733	91	75	2.344	18675.1	8.12	16.5148	67.5119	38	0	50	25	32	1	1	1	784
1	7	19.1266	1.70335	10.4718	116	117	3.58599	41508.8	9.84	17.9452	60.7773	59	0	55	27	31	0	0	0	506
1	7	9.25667	2.86294	21.66	103	116	3.58652	41508.8	9.14	17.9452	60.7773	59	0	55	27	31	0	1	0	506
2	7	19.1485	1.70335	10.4718	118	93	3.58599	41508.8	9.84	17.9452	60.7773	59	0	55	27	31	0	0	0	506
2	7	9.25667	2.86294	21.66	133	95	3.58652	41508.8	9.14	17.9452	60.7773	59	0	55	27	31	0	1	0	506
1	2	19.6468	1.85013	26.5867	101	110	2.24294	26417.9	44.29	17.925	60.7378	61	0	52	25	29	0	0	0	193
1	2	9.02943	3.00955	57.9759	104	100	2.45436	26417.9	41.68	17.925	60.7378	61	0	52	25	29	0	1	0	193
2	2	19.6605	1.85013	26.5867	107	108	2.24294	26417.9	44.29	17.925	60.7378	61	0	52	25	29	0	0	0	193
2	2	9.02943	3.00955	57.9759	111	116	2.45436	26417.9	41.68	17.925	60.7378	61	0	52	25	29	0	1	0	193
1	2	9.30048	2.84113	53.307	101	95	2.28583	35351.5	44.69	16.7675	71.1004	20	0	54	23	42	1	1	1	515
2	2	9.30048	2.84113	53.307	104	96	2.28583	35351.5	44.69	16.7675	71.1004	20	0	54	23	42	1	1	1	515
1	3	20.0903	1.80849	13.7366	110	105	2.72367	34283.6	78.29	16.2019	68.2467	24	0	53	24	26.5	1	0	0	292
1	3	10.5982	2.77538	30.0128	99	86	2.85869	34283.6	72.77	16.2019	68.2467	24	0	53	24	26.5	1	1	0	292
2	3	20.1205	1.82489	13.7366	114	99	2.69035	34283.6	78.29	16.2019	68.2467	24	0	53	24	26.5	1	0	0	292
2	3	10.5982	2.77538	30.0128	113	93	2.85869	34283.6	72.77	16.2019	68.2467	24	0	53	24	26.5	1	1	0	292
1	2	9.13621	2.47269	35.7169	93	94	2.71869	43465.4	10.02	15.1583	47.1758	19	0	44	16	39	1	1	1	659
2	2	9.13621	2.47269	35.7169	90	72	2.71869	43465.4	10.02	15.1583	47.1758	19	0	44	16	39	1	1	0	659
1	1	10.3573	2.72279	46.3546	111	106	2.92984	41341.3	51.75	16.9917	70.5258	17	0	54	28	31	0	1	1	351
2	1	10.3573	2.72279	46.3546	99	89	2.92984	41341.3	51.75	16.9917	70.5258	17	0	54	28	31	0	1	0	351
1	1	19.1622	1.75042	15.7968	109	99	2.72618	50867.1	249.87	17.5981	60.5885	30	0	56	26	31	0	0	0	182
1	1	9.05681	2.85891	35.4572	124	103	2.83924	50867.1	232.24	17.5981	60.5885	30	0	56	26	31	0	1	0	182
2	1	19.0828	1.73913	15.7968	103	119	2.71326	50867.1	249.87	17.6167	60.7411	30	0	56	26	31	0	0	0	182
2	1	9.05681	2.85891	35.4572	98	96	2.83924	50867.1	232.24	17.6167	60.7411	30	0	56	26	31	0	1	0	182
1	2	19.2142	1.65681	23.1066	104	104	2.89909	50761.8	19.08	17.4779	60.809	20	0	55	27	28	0	0	1	283
1	2	9.00753	2.94383	10.2652	104	107	3.42327	52769.7	58.79	17.4779	60.809	20	0	55	27	28	0	1	1	283
2	2	19.217	1.65681	23.1066	117	109	2.89909	50761.8	19.08	17.4779	60.809	20	0	55	27	28	0	0	0	283
2	2	9.00753	2.94383	10.2652	118	103	3.42327	52769.7	58.79	17.4779	60.809	20	0	55	27	28	0	1	0	283
1	3	9.41821	2.51315	42.7454	103	98	2.19285	25925.8	58.72	17.1025	71.7896	31	0	53	25	27	0	1	1	306
2	3	9.41821	2.51315	42.7454	100	109	2.19285	25925.8	58.72	17.1025	71.7896	31	0	53	25	27	0	1	0	306
1	2	9.70021	2.26007	13.6174	98	90	3.20717	44327.2	15.44	14.9203	48.1783	24		56	28	33.5	0	1	0	379
2	2	9.70021	2.26007	13.6174	118	87	3.20717	44327.2	15.44	14.9203	48.1783	24		56	28	33.5	0	1	0	379
1	2	10.8665	2.85419	43.2309	100	112	3.02163	41770.4	82.22	17.6678	64.2431	26	0	46	18	35	0	1	0	181
2	2	10.8665	2.85419	43.2309	93	104	3.02163	41770.4	82.22	17.6678	64.2431	26	0	46	18	35	0	1	0	181
1	2	9.37166	2.85112	103.839	99	95	2.90359	45093.3	817.06	17.9358	61.3123	25	0	58	22	36.5	1	1	0	195
2	2	9.37166	2.85112	103.839	77	91	2.90359	45093.3	817.06	18.01	60.9892	25	0	58	22	36.5	1	1	0	195
1	3	9.08419	2.86017	14.0432	87	79	2.39203	31410.4	25.61	16.5071	67.7652	32	0	44	8	43.5	0	1	0	276
2	3	19.1923	1.73264	23.8077	104	81	2.30112	31885.4	110.31	16.5071	67.7652	32	0	44	8	43.5	0	0	0	276
2	3	9.08419	2.86017	14.0432	107	102	2.39203	31410.4	25.61	16.5071	67.7652	32	0	44	8	43.5	0	1	0	276
1	4	10.204	2.71467	86.8564	64	73	2.39518	41332.8	803.94	17.4281	70.2972	36	0	54	29	33	1	1	1	263
2	4	10.204	2.71467	86.8564	87	109	2.39518	41332.8	803.94	17.4281	70.2972	36	0	54	29	33	1	1	1	263
1	3	19.729	1.69997	19.6907	108	83	3.37774	55321.9	122.01	18.2923	60.639	19	0	52	19	15	0	0	1	799
1	3	9.63997	2.87779	19.4815	114	94	3.22555	34264.3	14.1	18.2923	60.639	19	0	52	19	15	0	1	1	799
2	3	19.7262	1.69997	19.6907	76	70	3.37774	55321.9	122.01	18.2923	60.639	19	0	52	19	15	0	0	0	799
2	3	9.63997	2.87779	19.4815	102	59	3.22555	34264.3	14.1	18.2923	60.639	19	0	52	19	15	0	1	0	799
1	3	20.0274	1.73633	12.0827	120	113	3.27496	57980.3	32.24	17.4158	69.7654	31	0	51	15	20	1	0	1	253
1	3	10.2806	2.7986	37.5806	119	97	3.02598	41495.5	4.44	17.4158	69.7654	31	0	51	15	20	1	1	1	253
2	3	20.1369	1.65138	12.0827	96	108	3.26343	57980.3	32.24	17.4158	69.7654	31	0	51	15	20	1	0	0	253
2	3	10.2806	2.7986	37.5806	98	90	3.02598	41495.5	4.44	17.4158	69.7654	31	0	51	15	20	1	1	0	253
1	1	9.60438	2.47772	5.19945	132	96	4.19228	103418	18.19	17.2114	58.8053	17	0	52	26	31.5	0	1	1	994
2	1	9.60438	2.47772	5.19945	123	90	4.19228	103418	18.19	17.2114	58.8053	17	0	52	26	31.5	0	1	0	994
1	7	9.25394	2.88929	30.33	90	94	2.37129	22701.2	33.31	17.8004	62.4746	22	0	52	23	25	1	1	0	932
2	7	9.25394	2.88929	30.33	76	87	2.37129	22701.2	33.31	17.8004	62.4746	22	0	52	23	25	1	1	0	932
1	2	9.36893	2.50466	48.6931	112	76	2.66834	23932.5	129.56	17.0788	68.8223	26		53	26	42	1	1	1	70
2	2	9.36893	2.50466	48.6931	109	89	2.66834	23932.5	129.56	17.0315	68.4296	26		53	26	42	1	1	1	70
1	2	19.9507	1.56859	16.0418	111	110	3.23822	32458.3	7.27	17.9203	57.3064	27	0	55	19	40	1	0	0	927
1	2	10.475	2.92193	27.9855	92	113	2.14734	23923.3	172.25	17.9203	57.3064	27	0	55	19	40	1	1	0	927
2	2	19.9069	1.56859	16.0418	83	107	3.23822	32458.3	7.27	17.9203	57.3064	27	0	55	19	40	1	0	0	927
2	2	10.475	2.92193	27.9855	84	95	2.14734	23923.3	172.25	17.9203	57.3064	27	0	55	19	40	1	1	0	927
1	1	19.1513	1.3171	16.9342	125	127	2.66126	50781.7	98	14.7975	49.3325	46	0	55	25	28	1	0	0	633
1	1	9.8371	2.09728	37.2593	127	133	3.10206	50781.7	92.88	14.7975	49.3325	46	0	55	25	28	1	1	0	633
2	1	18.1492	1.38916	16.9342	102	97	2.80503	50781.7	98	14.7975	49.3325	46	0	55	25	28	1	0	0	633
2	1	9.8371	2.09728	37.2593	132	109	3.10206	50781.7	92.88	14.7975	49.3325	46	0	55	25	28	1	1	0	633
1	1	20.9555	1.63792	14.7954	126	129	3.53944	67005.9	95.49	17.3892	70.1433	28	0	56	27	37.5	0	0	1	957
1	1	10.9487	2.65015	32.6114	122	120	3.748	67005.9	88.75	17.3892	70.1433	28	0	56	27	37.5	0	1	1	957
2	1	20.9117	1.63792	14.7954	120	102	3.53944	67005.9	95.49	17.3892	70.1433	28	0	56	27	37.5	0	0	0	957
2	1	10.9487	2.65015	32.6114	116	106	3.748	67005.9	88.75	17.3892	70.1433	28	0	56	27	37.5	0	1	0	957
1	3	19.6112	1.77977	30.1442	96	98	2.58865	33374	50.56	17.1985	70.7081	20	0	53	25	20	0	0	0	491
1	3	10.2149	2.55137	55.8376	109	116	2.82291	53313.7	86.62	17.1985	70.7081	20	0	53	25	20	0	1	0	491
2	3	19.5373	1.75105	30.1442	103	107	2.58858	33374	50.56	17.1985	70.7081	20	0	53	25	20	0	0	0	491
2	3	10.2149	2.55137	55.8376	113	109	2.82291	53313.7	86.62	17.1985	70.7081	20	0	53	25	20	0	1	0	491
1	1	9.69747	1.64646	6.89005	114	104	3.49916	84557.8	31.34	16.0231	60.6756	17	0	55	27	22	0	1	0	184
2	1	9.69747	1.64646	6.89005	111	98	3.49916	84557.8	31.34	16.0231	60.6756	17	0	55	27	22	0	1	0	184
1	3	9.01574	2.93429	24.7905	60	85	2.42387	27711.2	79.24	17.9172	61.2903	58	0	53	27	35.5	1	1	1	771
2	3	9.01574	2.93429	24.7905	89	90	2.42387	27711.2	79.24	17.9172	61.2903	58	0	53	27	35.5	1	1	1	771
1	2	18.9788	1.73755	7.1023	91	103	2.19451	33796.8	28.21	17.8423	60.7373	26	0	49	21	28	1	0	0	28
1	2	9.00479	2.92705	16.4298	83	78	2.4276	33796.8	26.22	17.8423	60.7373	26	0	49	21	28	1	1	0	28
2	2	18.9815	1.74453	7.1023	83	58	2.19733	33796.8	28.21	17.8423	60.7373	26	0	49	21	28	1	0	0	28
2	2	9.00479	2.92705	16.4298	95	63	2.4276	33796.8	26.22	17.8423	60.7373	26	0	49	21	28	1	1	0	28
1	7	20.3559	1.65335	12.6605	102	128	2.74969	37771.5	85.5	17.9108	59.9253	29	0	56	28	33	0	0	0	840
1	7	10.8939	2.65443	26.0047	100	126	2.90149	37771.5	79.46	17.9108	59.9253	29	0	56	28	33	0	1	0	840
2	7	20.2382	1.60438	12.6605	106	127	2.75589	37771.5	85.5	17.9108	59.9253	29	0	56	28	33	0	0	0	840
2	7	10.8939	2.65443	26.0047	91	109	2.90149	37771.5	79.46	17.9108	59.9253	29	0	56	28	33	0	1	0	840
1	7	10.7132	2.83658	6.17335	106	91	4.75306	80505	1.73	17.2242	63.1425	22	0	52	24	32	0	1	1	951
2	7	10.7132	2.83658	6.17335	99	93	4.75306	80505	1.73	17.2242	63.1425	22	0	52	24	32	0	1	1	951
1	1	9.72211	2.17829	12.6785	110	104	3.00998	74920.1	37.85	17.5825	65.7375	17	0	52	26	18	0	1	1	179
2	1	9.72211	2.17829	12.6785	81	126	3.00998	74920.1	37.85	17.5825	65.7375	17	0	52	26	18	0	1	1	179
1	2	9.82067	2.86193	56.2289	91	76	2.24546	29115.9	3.68	17.3808	64.925	24	0	50	21	39	1	1	0	886
2	2	9.82067	2.86193	56.2289	69	71	2.24546	29115.9	3.68	17.3808	64.925	24	0	50	21	39	1	1	0	886
1	3	9.22382	2.86291	56.986	59	94	2.73331	28210.6	156.08	18.1885	62.8031	31	1	45	6	32	0	1	0	953
2	3	19.0965	1.81257	4.74325	92	100	2.52023	58086.7	9.27	18.1885	62.8031	31	1	45	6	32	0	0	0	953
2	3	9.22382	2.86291	56.986	79	102	2.73331	28210.6	156.08	18.1885	62.8031	31	1	45	6	32	0	1	0	953
1	1	9.75222	2.68573	47.3483	116	90	2.34518	64033.2	67.53	17.9775	61.8896	22	0	54	25	28	0	1	0	767
2	1	9.75222	2.68573	47.3483	96	111	2.34518	64033.2	67.53	17.9775	61.8896	22	0	54	25	28	0	1	0	767
1	3	9.22656	2.86101	17.6008	71	70	2.45962	21754	8.41	16.9729	66.0058	46	0	47	10	32	1	1	0	439
2	3	9.22656	2.86101	17.6008	91	72	2.45962	21754	8.41	16.9729	66.0058	46	0	47	10	32	1	1	0	439
1	2	9.08966	2.72178	35.748	101	109	2.56183	37739.4	97.01	18.0854	63.0196	47	0	58	19	40	1	1	0	731
2	2	9.08966	2.72178	35.748	68	108	2.56183	37739.4	97.01	18.0854	63.0196	47	0	58	19	40	1	1	0	731
1	1	9.80424	2.63083	20.4956	120	90	2.98198	35440.4	10.96	17.8425	59.4637	42	0	54	27	42	1	1	0	664
2	1	9.80424	2.63083	20.4956	133	92	2.98198	35440.4	10.96	17.8425	59.4637	42	0	54	27	42	1	1	0	664
1	7	9.81246	2.66241	25.7059	119	121	3.32676	67005.9	23.76	17.1246	70.6354	26	0	53	25	32.5	1	1	1	101
2	7	19.4168	1.73472	11.6578	123	119	3.2601	67005.9	25.58	17.1246	70.6354	26	0	53	25	32.5	1	0	1	101
2	7	9.81246	2.66241	25.7059	119	128	3.32676	67005.9	23.76	17.1246	70.6354	26	0	53	25	32.5	1	1	1	101
1	7	9.54689	2.35683	24.8129	103	108	3.30275	44128.2	90.6	17.4396	44.7931	17	0	43	14	27	1	1	1	211
2	7	9.54689	2.35683	24.8129	97	87	3.30275	44128.2	90.6	17.4396	44.7931	17	0	43	14	27	1	1	1	211
1	2	10.4778	2.48274	47.4243	104	120	2.83344	31668.2	88.27	17.1683	70.6142	18	0	57	27	37.5	1	1	1	857
2	2	10.4778	2.48274	47.4243	92	81	2.83344	31668.2	88.27	17.1683	70.6142	18	0	57	27	37.5	1	1	1	857
1	2	9.44285	2.78556	25.7184	119	98	2.93379	45976.6	9.07	17.7889	61.1156	40	0	54	27	38	0	1	1	221
2	2	9.44285	2.78556	25.7184	115	107	2.93379	45976.6	9.07	17.7889	61.1156	40	0	54	27	38	0	1	1	221
1	2	19.9507	1.67059	23.9022	101	107	3.0117	31668.2	80.3	17.2571	69.6858	33	0	57	23	26.5	1	0	0	919
1	2	10.705	2.48723	49.4832	103	93	2.92032	31668.2	74.64	17.2571	69.6858	33	0	57	23	26.5	1	1	0	919
2	2	19.9425	1.67059	23.9022	111	116	3.0117	31668.2	80.3	17.2571	69.6858	33	0	57	23	26.5	1	0	0	919
2	2	10.705	2.48723	49.4832	111	118	2.92032	31668.2	74.64	17.2571	69.6858	33	0	57	23	26.5	1	1	0	919
1	3	9.81793	2.86525	16.4486	99	69	2.43779	20891.4	9.71	16.4492	67.1283	46	0	54	25	31	1	1	1	776
2	3	9.81793	2.86525	16.4486	109	120	2.43779	20891.4	9.71	16.4492	67.1283	46	0	54	25	31	1	1	0	776
1	4	10.2094	2.2814	49.7309	102	124	2.83026	52536.3	62.12	17.81	64.6629	18	0	55	26	28	0	1	0	39
2	4	10.2094	2.2814	49.7309	104	123	2.83026	52536.3	62.12	17.81	64.6629	18	0	55	26	28	0	1	0	39
1	3	9.09514	2.48353	45.9473	103	96	2.41771	31668.2	123.4	17.2254	69.8833	37	0	51	17	33.5	1	1	1	582
2	3	9.09514	2.48353	45.9473	104	101	2.41771	31668.2	123.4	17.2254	69.8833	37	0	51	17	33.5	1	1	0	582
1	1	9.01848	2.63933	26.8752	96	100	3.77405	63658.8	14.12	17.2042	69.8608	21	1	55	26	44.5	1	1	1	654
2	1	9.01848	2.63933	26.8752	69	106	3.77405	63658.8	14.12	17.2042	69.8608	21	1	55	26	44.5	1	1	1	654
1	2	9.48118	2.91273	42.1619	87	60	1.39215	22327.6	9.74	17.9653	61.0517	45	0	57	22	37	1	1	0	151
2	2	9.48118	2.91273	42.1619	106	74	1.39215	22327.6	9.74	17.9653	61.0517	45	0	57	22	37	1	1	0	151
1	1	9.19644	2.65396	26.4974	83	102	3.11975	65615.2	16.77	17.1233	70.5017	31	0	45	16	44	1	1	1	604
2	1	9.19644	2.65396	26.4974	82	103	3.11975	65615.2	16.77	17.1233	70.5017	31	0	45	16	44	1	1	1	604
1	3	9.0705	2.60519	16.59	89	69	4.09724	42139.8	20.79	16.6625	50.3637	23	0	52	16	39	1	1	1	509
2	3	9.0705	2.60519	16.59	105	104	4.09724	42139.8	20.79	16.6625	50.3637	23	0	52	16	39	1	1	0	509
1	3	9.18549	2.34949	14.09	111	89	2.77194	37383.3	74.79	16.7092	58.5725	53	0	52	19	30	1	1	0	461
2	3	9.18549	2.34949	14.09	102	91	2.77194	37383.3	74.79	16.7092	58.5725	53	0	52	19	30	1	1	0	461
1	7	21.1663	1.74309	36.4021	133	132	3.65686	90369.7	64.95	17.5267	69.8135	21	0	56	28	22.5	0	0	1	237
1	7	10.8747	2.49306	76.6878	141	148	3.90863	90369.7	60.37	17.5267	69.8135	21	0	56	28	22.5	0	1	1	237
2	7	21.1608	1.74309	36.4021	131	130	3.65686	90369.7	64.95	17.5267	69.8135	21	0	56	28	22.5	0	0	1	237
2	7	10.8747	2.49306	76.6878	141	133	3.90863	90369.7	60.37	17.5267	69.8135	21	0	56	28	22.5	0	1	1	237
1	1	10.8255	2.63875	51.2443	97	131	3.04012	60368.9	118.86	16.7175	69.4292	25	0	54	29	25.5	0	1	0	820
2	1	10.8255	2.63875	51.2443	121	127	3.04012	60368.9	118.86	16.7175	69.4292	25	0	54	29	25.5	0	1	0	820
1	1	19.1951	1.63584	10.9107	121	115	4.18207	78656.9	80.15	17.1344	70.4952	34	0	56	22	21	0	0	1	283
1	1	9.41273	2.27664	31.4779	113	122	4.3959	78656.9	287.96	17.1344	70.4952	34	0	56	22	21	0	1	1	283
2	1	19.0609	1.56221	10.9107	115	115	4.2071	78656.9	80.15	17.1344	70.4952	34	0	56	22	21	0	0	1	283
2	1	9.41273	2.27664	31.4779	101	99	4.3959	78656.9	287.96	17.1344	70.4952	34	0	56	22	21	0	1	1	283
1	2	9.10883	2.88646	34.9963	105	112	4.09094	37812.1	10.2	17.6765	59.9278	17	0	53	22	49	0	1	1	821
2	2	9.10883	2.88646	34.9963	94	70	4.09094	37812.1	10.2	17.6765	59.9278	17	0	53	22	49	0	1	0	821
1	1	19.9644	1.60032	19.0376	121	116	2.9208	55834.4	9.59	16.5562	52.6467	19	0	54	24	24	0	0	1	143
1	1	9.23477	2.35013	38.7636	128	89	3.30812	55834.4	8.91	16.5562	52.6467	19	0	54	24	24	0	1	1	143
2	1	9.23477	2.35013	38.7636	116	93	3.30812	55834.4	8.91	16.5808	45.6942	19	0	54	24	24	0	1	1	143
1	1	9.10883	2.72527	17.5509	100	99	4.09914	80457.9	1.68	17.684	64.1752	17	0	51	26	36	0	1	0	260
2	1	9.10883	2.72527	17.5509	110	86	4.09914	80457.9	1.68	17.9128	64.6631	17	0	51	26	36	0	1	0	260
1	2	19.9288	1.65623	8.45105	110	104	1.81455	32244.7	93.64	15.9158	46.0833	30	0	57	20	37	1	0	1	502
1	2	9.22656	2.42513	40.1392	93	102	2.19994	43018.8	49.37	15.9158	46.0833	30	0	57	20	37	1	1	1	502
2	2	19.9097	1.62774	8.45105	84	96	1.82714	32244.7	93.64	15.9158	46.0833	30	0	57	20	37	1	0	1	502
2	2	9.22656	2.42513	40.1392	86	106	2.19994	43018.8	49.37	15.9158	46.0833	30	0	57	20	37	1	1	1	502
1	2	9.15537	2.73702	46.0906	82	120	2.01563	33160.8	84.88	17.8383	64.4833	31	0	55	29	45	1	1	1	135
2	2	9.15537	2.73702	46.0906	93	95	2.01563	33160.8	84.88	17.8383	64.4833	31	0	55	29	45	1	1	0	135
1	1	9.35524	2.51558	10.1217	120	105	1.80792	88593.1	13.55	16.4246	68.4592	63	0	56	28	23.5	1	1	0	462
2	1	9.35524	2.51558	10.1217	130	112	1.80792	88593.1	13.55	16.4133	68.5044	63	0	56	28	23.5	1	1	0	462
1	2	9.44011	2.82734	31.9272	77	80	3.07958	25069	64.72	18.1608	60.1233	27	1	50	23	48	1	1	1	918
2	2	9.44011	2.82734	31.9272	77	88	3.07958	25069	64.72	18.1608	60.1233	27	1	50	23	48	1	1	0	918
1	2	19.5838	1.60645	15.7398	98	89	2.00685	35883.7	10.25	16.9722	50.6231	18	0	45	15	47	1	0	1	563
1	2	9.02669	2.39786	32.618	102	87	2.28465	35883.7	9.52	16.9722	50.6231	18	0	45	15	47	1	1	1	563
2	2	19.9808	1.70445	15.7398	101	103	1.94816	35883.7	10.25	16.9722	50.6231	18	0	45	15	47	1	0	0	563
2	2	9.02669	2.39786	32.618	101	73	2.28465	35883.7	9.52	16.9722	50.6231	18	0	45	15	47	1	1	0	563
1	2	19.3155	1.86052	14.3557	93	111	1.82298	27536.3	29.99	18.166	59.065	47	0	58	26	30	1	0	0	154
1	2	10.0233	2.83513	23.4914	98	118	2.19809	20471.6	136.44	18.166	59.065	47	0	58	26	30	1	1	0	154
2	2	19.3018	1.86052	14.3557	112	103	1.82298	27536.3	29.99	18.166	59.065	47	0	58	26	30	1	0	0	154
2	2	10.0233	2.83513	23.4914	132	97	2.19809	20471.6	136.44	18.166	59.065	47	0	58	26	30	1	1	0	154
1	4	9.05955	2.50604	65.8976	136	121	3.0986	40869.4	277.85	18.5339	59.4136	18	0	53	25	22.5	0	1	1	849
2	4	9.05955	2.50604	65.8976	129	126	3.0986	40869.4	277.85	18.5339	59.4136	18	0	53	25	22.5	0	1	1	849
1	2	9.34428	2.54191	18.9592	116	100	3.2742	39988.7	17.7	18.3946	59.4344	18	0	58	26	41	0	1	0	857
2	2	20.2136	1.72129	18.7292	106	98	1.90625	30908.6	6.44	18.3946	59.4344	18	0	58	26	41	0	0	0	857
2	2	9.34428	2.54191	18.9592	128	130	3.2742	39988.7	17.7	18.3946	59.4344	18	0	58	26	41	0	1	0	857
1	7	9.28131	2.21675	10.5543	106	120	3.49926	56121.8	9.37	16.8311	51.7797	20	0	54	28	38	0	1	1	110
2	7	9.28131	2.21675	10.5543	104	103	3.49926	56121.8	9.37	16.8311	51.7797	20	0	54	28	38	0	1	0	110
1	1	19.1239	1.03719	2.46785	107	121	3.26855	96534	2.95	17.169	54.656	21	0	55	26	30	0	0	1	151
1	1	9.2512	1.81301	5.54405	120	122	3.4259	64467.9	0.13	17.169	54.656	21	0	55	26	30	0	1	1	151
2	1	19.1567	1.03719	2.46785	120	130	3.26855	96534	2.95	17.169	54.656	21	0	55	26	30	0	0	1	151
2	1	9.2512	1.81301	5.54405	120	135	3.4259	64467.9	0.13	17.169	54.656	21	0	55	26	30	0	1	1	151
1	2	9.56879	2.23958	15.5832	85	97	3.81054	52314.9	98.05	16.9337	57.6262	21	0	50	20	43	1	1	1	445
2	2	9.56879	2.23958	15.5832	105	111	3.81054	52314.9	98.05	16.9337	57.6262	21	0	50	20	43	1	1	0	445
1	3	10.5051	2.62291	30.0111	103	56	2.17934	30463.4	46.84	16.5704	71.2929	33	0	52	15	30.5	0	1	1	920
2	3	10.5051	2.62291	30.0111	88	92	2.17934	30463.4	46.84	16.5704	71.2929	33	0	52	15	30.5	0	1	0	920
1	7	9.39904	2.43569	31.6685	119	124	4.01598	67005.9	93.67	17.0639	70.1686	27	0	52	24	26	0	1	1	827
2	7	19.0116	1.65325	15.2454	104	110	3.58952	67005.9	100.77	17.0639	70.1686	27	0	52	24	26	0	0	1	827
2	7	9.39904	2.43569	31.6685	100	112	4.01598	67005.9	93.67	17.0639	70.1686	27	0	52	24	26	0	1	1	827
1	2	10.1875	2.68775	14.7864	96	91	2.03918	22388.6	31.59	18.2417	60.3842	43	0	55	23	28	1	1	1	710
2	2	10.1875	2.68775	14.7864	111	105	2.03918	22388.6	31.59	18.2417	60.3842	43	0	55	23	28	1	1	0	710
1	2	9.57153	2.72067	22.0297	109	112	3.41484	31661.8	114.78	18.2442	59.0022	36	0	58	28	34.5	1	1	1	968
2	2	9.57153	2.72067	22.0297	103	117	3.41484	31661.8	114.78	18.2442	59.0022	36	0	58	28	34.5	1	1	0	968
1	1	9.24846	2.47115	25.001	120	110	4.02762	38487	89.98	17.7773	61.4112	26	0	53	27	39.5	0	1	1	998
2	1	9.24846	2.47115	25.001	124	119	4.02762	38487	89.98	17.7254	61.3554	26	0	53	27	39.5	0	1	0	998
1	7	9.01848	2.50974	52.9847	90	132	3.95143	35725.3	116.69	17.405	71.4192	23	0	50	27	42	1	1	0	873
2	7	9.01848	2.50974	52.9847	90	95	3.95143	35725.3	116.69	17.405	71.4192	23	0	50	27	42	1	1	0	873
1	1	9.295	1.74155	12.3048	118	138	3.47913	83961.3	25.9	17.3325	54.0333	19	0	54	24	32	0	1	1	898
2	1	9.295	1.74155	12.3048	132	119	3.47913	83961.3	25.9	17.3325	54.0333	19	0	54	24	32	0	1	1	898
1	2	19.6304	1.6829	31.2446	116	129	2.06955	49548.4	360.48	17.0465	54.9665	30	0	56	25	39	1	0	1	360
1	2	9.09514	2.42036	65.3955	90	119	2.49488	49548.4	376.17	17.0465	54.9665	30	0	56	25	39	1	1	1	360
2	2	19.6304	1.6829	31.2446	104	114	2.06955	49548.4	360.48	17.0465	54.9665	30	0	56	25	39	1	0	1	360
2	2	9.09514	2.42036	65.3955	98	124	2.49488	49548.4	376.17	17.0465	54.9665	30	0	56	25	39	1	1	1	360
1	2	9.11978	1.67705	7.65885	114	97	3.22513	99685	0.57	17.401	52.6662	17	0	55	27	36	1	1	1	280
2	2	9.11978	1.67705	7.65885	109	100	3.22513	99685	0.57	17.401	52.6662	17	0	55	27	36	1	1	1	280
1	3	18.8912	1.62988	5.7768	120	100	2.36103	34353.8	16.59	16.8894	63.4933	35	0	51	22	37.5	1	0	0	30
1	3	9.02396	2.78972	23.5302	120	110	2.40112	20332.8	113.95	16.8894	63.4933	35	0	51	22	37.5	1	1	0	30
2	3	18.809	1.63916	5.7768	110	105	2.35897	34353.8	16.59	16.8894	63.4933	35	0	51	22	37.5	1	0	0	30
2	3	9.02396	2.78972	23.5302	125	103	2.40112	20332.8	113.95	16.8894	63.4933	35	0	51	22	37.5	1	1	0	30
1	7	10.642	1.8423	18.0267	98	116	3.14316	43703.3	25.72	17.3325	54.0333	28	0	56	21	26	1	1	1	988
2	7	10.642	1.8423	18.0267	105	119	3.14316	43703.3	25.72	17.3325	54.0333	28	0	56	21	26	1	1	1	988
1	7	9.24846	2.47047	40.7687	88	76	2.93002	27802.6	77.93	17.6046	64.0392	20		49	26	41	1	1	0	44
2	7	9.24846	2.47047	40.7687	95	80	2.93002	27802.6	77.93	17.6046	64.0392	20		49	26	41	1	1	0	44
1	1	18.8227	1.25882	6.9897	133	109	3.66906	93607.9	90.63	16.9073	56.7506	21	0	53	26	30	0	0	1	539
1	1	9.15264	2.05564	14.843	134	96	3.89753	93607.9	84.23	16.9073	56.7506	21	0	53	26	30	0	1	1	539
2	1	18.8255	1.25882	6.9897	94	104	3.66906	93607.9	90.63	16.9073	56.7506	21	0	53	26	30	0	0	0	539
2	1	9.15264	2.05564	14.843	117	92	3.89753	93607.9	84.23	16.9073	56.7506	21	0	53	26	30	0	1	0	539
1	1	9.11704	2.19732	42.9939	74	87	3.38105	58535.2	12.32	16.6404	53.4963	18	0	53	21	21.5	0	1	0	79
2	1	9.11704	2.19732	42.9939	114	88	3.38105	58535.2	12.32	16.6404	53.4963	18	0	53	21	21.5	0	1	0	79
1	7	9.11431	2.62189	5.4642	103	89	4.46009	137161	9.15	18.0869	60.6269	20	0	52	18	44	0	1	0	651
2	7	9.11431	2.62189	5.4642	63	79	4.46009	137161	9.15	18.1575	60.8619	20	0	52	18	44	0	1	0	651
1	1	10.5736	2.0933	30.6657	108	99	4.32864	83230.7	125.4	18.125	51.515	20		50	24	31	1	1	1	663
2	1	10.5736	2.0933	30.6657	104	85	4.32864	83230.7	125.4	18.125	51.515	20		50	24	31	1	1	1	663
1	4	9.64819	2.14492	24.1943	82	100	3.48408	44128.2	102.24	17.2775	52.1112	18	0	56	28	40	0	1	1	357
2	4	9.64819	2.14492	24.1943	103	103	3.48408	44128.2	102.24	17.2775	52.1112	18	0	56	28	40	0	1	0	357
1	7	9.14716	2.63704	30.6179	112	113	4.31125	47399.6	142.14	17.5258	65.2683	38	0	52	22	40	0	1	1	688
2	7	9.14716	2.63704	30.6179	123	102	4.31125	47399.6	142.14	17.5258	65.2683	38	0	52	22	40	0	1	1	688
1	1	9.12799	2.21372	25.3383	116	100	3.28944	56475.3	8.36	16.55	54.4342	23		55	24	31	0	1	1	481
2	1	9.12799	2.21372	25.3383	133	106	3.28944	56475.3	8.36	16.55	54.4342	23		55	24	31	0	1	1	481
1	2	19.165	1.67919	10.6321	97	106	2.39686	28838.3	37.83	17.75	60.9196	23	0	18	4	28	1	0	1	322
1	2	9.61533	2.68727	22.7101	81	109	2.58089	28838.3	67.5	17.75	60.9196	23	0	18	4	28	1	1	1	322
2	2	19.165	1.67919	10.6321	102	119	2.39686	28838.3	37.83	17.7827	60.9077	23	0	18	4	28	1	0	1	322
2	2	9.61533	2.68727	22.7101	87	82	2.58089	28838.3	67.5	17.7827	60.9077	23	0	18	4	28	1	1	1	322
1	2	19.4497	1.82324	23.7339	94	73	1.99738	28531.2	67.11	17.5785	62.3752	23	0	55	22	37	1	0	0	651
1	2	10.2806	2.6977	52.1512	84	70	2.20578	28531.2	71.77	17.5785	62.3752	23	0	55	22	37	1	1	0	651
2	2	19.2608	0.339282	18.9801	106	102	3.61033	29013.3	87.04	17.5785	62.3752	23	0	55	22	37	1	0	0	651
2	2	10.2806	2.6977	52.1512	106	88	2.20578	28531.2	71.77	17.5785	62.3752	23	0	55	22	37	1	1	0	651
1	4	9.13347	2.50117	36.1487	109	133	2.74011	52125	44.79	16.7283	71.1092	20	0	53	29	17	0	1	1	744
2	4	9.13347	2.50117	36.1487	99	85	2.74011	52125	44.79	16.7283	71.1092	20	0	53	29	17	0	1	1	744
1	2	18.7652	1.62142	8.53815	99	81	3.10456	39028.9	131.22	17.6385	61.6158	32	0	53	21	34	0	0	0	225
1	2	9.05955	2.6521	57.9274	98	89	3.41331	45300	86.94	17.6385	61.6158	32	0	53	21	34	0	1	0	225
2	2	9.05955	2.6521	57.9274	106	82	3.41331	45300	86.94	17.6385	61.6158	32	0	53	21	34	0	1	0	225
1	2	19.4552	1.77544	18.2421	116	111	2.73288	37502.9	133.62	16.7731	65.554	18	0	58	26	33	1	0	0	115
1	2	10.2423	2.54613	38.3293	120	105	2.85708	37502.9	124.18	16.7731	65.554	18	0	58	26	33	1	1	0	115
2	2	19.447	1.77544	18.2421	102	108	2.73288	37502.9	133.62	16.7731	65.554	18	0	58	26	33	1	0	0	115
2	2	10.2423	2.54613	38.3293	94	101	2.85708	37502.9	124.18	16.7731	65.554	18	0	58	26	33	1	1	0	115
1	2	9.24025	2.39888	18.8282	113	124	2.66761	29264	14.27	17.5378	62.8139	20	0	50	19	31	1	1	1	324
2	2	9.24025	2.39888	18.8282	105	106	2.66761	29264	14.27	17.5378	62.8139	20	0	50	19	31	1	1	0	324
1	2	10.256	2.24609	36.9351	95	88	2.92084	56903.5	191.51	16.6356	54.2206	17	0	56	21	23	1	1	0	646
2	2	10.256	2.24609	36.9351	91	111	2.92084	56903.5	191.51	16.6356	54.2206	17	0	56	21	23	1	1	0	646
1	1	18.6585	1.60284	21.7791	120	98	3.71889	69358.6	120.54	17.1219	70.3027	19	0	55	29	24.5	0	0	0	227
1	1	9.08693	2.358	43.6112	121	120	4.18349	69358.6	112.04	17.1219	70.3027	19	0	55	29	24.5	0	1	0	227
2	1	18.6585	1.60284	21.7791	106	103	3.71889	69358.6	120.54	17.1219	70.3027	19	0	55	29	24.5	0	0	0	227
2	1	9.08693	2.358	43.6112	128	119	4.18349	69358.6	112.04	17.1219	70.3027	19	0	55	29	24.5	0	1	0	227
1	1	9.21287	2.32542	30.899	104	125	4.68492	37158.8	218.62	17.5292	72.1658	25	0	47	13	28	0	1	1	622
2	1	9.21287	2.32542	30.899	111	118	4.68492	37158.8	218.62	17.5292	72.1658	25	0	47	13	28	0	1	1	622
1	4	9.2731	2.70881	59.0792	117	98	1.81989	24267	293.24	18.1202	59.9392	49	0	37	10	47	1	1	0	636
2	4	18.8583	1.74239	27.0583	104	103	1.68449	24267	292.27	18.1202	59.9392	49	0	37	10	47	1	0	0	636
2	4	9.2731	2.70881	59.0792	113	97	1.81989	24267	293.24	18.1202	59.9392	49	0	37	10	47	1	1	0	636
1	2	10.4093	2.28622	18.6689	97	113	3.07545	32244.7	144.68	17.0683	48.1583	40	0	58	25	34	1	1	1	618
2	2	10.4093	2.28622	18.6689	85	109	3.07545	32244.7	144.68	17.0683	48.1583	40	0	58	25	34	1	1	1	618
1	2	10.3354	2.27011	23.9549	93	115	2.07079	21310.2	78.89	17.2783	69.7687	29	0	58	26	35.5	1	1	0	735
2	2	19.1567	1.644	10.9686	76	103	1.92932	21310.2	84.88	17.2783	69.7687	29	0	58	26	35.5	1	0	0	735
2	2	10.3354	2.27011	23.9549	92	85	2.07079	21310.2	78.89	17.2783	69.7687	29	0	58	26	35.5	1	1	0	735
1	3	10.5462	2.29283	34.298	97	103	2.1513	20589.9	86.09	17.5758	71.4096	48	0	51	21	22.5	0	1	0	9
2	3	10.5462	2.29283	34.298	118	93	2.1513	20589.9	86.09	17.5758	71.4096	48	0	51	21	22.5	0	1	0	9
1	2	19.6742	1.92614	9.21055	102	83	2.40973	40069.5	41.46	17.9492	60.6583	20	0	49	16	42	1	0	1	816
1	2	9.13073	2.68326	20.7738	101	93	2.8037	40069.5	38.54	17.9492	60.6583	20	0	49	16	42	1	1	1	816
2	2	18.7379	1.73935	9.21055	104	79	2.48362	40069.5	41.46	17.9492	60.6583	20	0	49	16	42	1	0	0	816
2	2	9.13073	2.68326	20.7738	106	88	2.8037	40069.5	38.54	17.9492	60.6583	20	0	49	16	42	1	1	0	816
1	7	19.5428	1.29947	5.78405	121	108	3.10181	83961.3	22.8	17.0325	52.6669	17	0	55	26	24	0	0	1	991
1	7	9.02122	1.7351	12.0617	114	91	3.52749	83961.3	21.19	17.0325	52.6669	17	0	55	26	24	0	1	1	991
2	7	19.0828	1.23304	5.78405	110	101	3.17436	83961.3	22.8	17.0325	52.6669	17	0	55	26	24	0	0	1	991
2	7	9.02122	1.7351	12.0617	99	112	3.52749	83961.3	21.19	17.0325	52.6669	17	0	55	26	24	0	1	1	991
1	3	9.13073	2.69868	15.6912	90	100	2.47975	18675.1	21.68	17.0167	72.8917	43	0	51	18	34	1	1	1	242
2	3	9.13073	2.69868	15.6912	95	122	2.47975	18675.1	21.68	17.0167	72.8917	43	0	51	18	34	1	1	0	242
1	2	9.25941	2.59792	17.6808	83	90	3.03573	31477.8	66.84	18.1698	60.5842	38	0	54	20	47.5	1	1	1	957
2	2	9.25941	2.59792	17.6808	96	97	3.03573	31477.8	66.84	18.1698	60.5842	38	0	54	20	47.5	1	1	1	957
1	2	18.6776	1.72332	18.2419	123	128	1.98129	22898.2	9.32	17.3546	47.3904	37	0	55	29	35.5	0	0	1	913
1	2	9.00753	2.70333	39.4935	110	105	2.10695	22898.2	8.66	17.3546	47.3904	37	0	55	29	35.5	0	1	1	913
2	2	18.6858	1.72332	18.2419	127	118	1.98129	22898.2	9.32	17.3546	47.3904	37	0	55	29	35.5	0	0	1	913
2	2	9.00753	2.70333	39.4935	99	121	2.10695	22898.2	8.66	17.3546	47.3904	37	0	55	29	35.5	0	1	1	913
1	2	9.05955	2.4594	29.7856	114	101	2.64934	68385.9	27.91	17.1433	68.3646	18	0	51	22	40.5	1	1	0	566
2	2	9.05955	2.4594	29.7856	69	72	2.64934	68385.9	27.91	17.2015	68.2444	18	0	51	22	40.5	1	1	0	566
1	3	9.14168	2.63996	35.0748	81	76	2.46239	24544.8	64.56	16.9371	66.9117	21	1	50	25	56	0	1	1	275
2	3	9.14168	2.63996	35.0748	72	70	2.46239	24544.8	64.56	16.9371	66.9117	21	1	50	25	56	0	1	1	275
1	4	9.28131	2.73872	18.86	105	108	2.83681	24294.4	49.68	18.2575	60.8283	20	0	48	21	31	0	1	1	743
2	4	9.28131	2.73872	18.86	102	114	2.83681	24294.4	49.68	18.2575	60.8283	20	0	48	21	31	0	1	1	743
1	1	9.38535	2.04322	8.76255	114	142	2.63672	45999.8	8.32	17.2023	55.4923	20	0	54	25	36	0	1	1	259
2	1	9.38535	2.04322	8.76255	138	124	2.63672	45999.8	8.32	17.22	55.0546	20	0	54	25	36	0	1	0	259
1	7	18.6968	1.49446	11.2594	92	117	3.76697	40555.6	53.15	16.0098	50.3229	29	0	54	27	50	1	0	0	631
1	7	9.19644	2.47706	19.9911	89	118	4.58042	50375.7	38.1	16.0098	50.3229	29	0	54	27	50	1	1	0	631
2	7	9.19644	2.47706	19.9911	89	94	4.58042	50375.7	38.1	16.0098	50.3229	29	0	54	27	50	1	1	0	631
1	1	9.21287	2.61695	52.1272	124	126	3.78602	62856.6	106.52	17.02	73.0608	25	0	56	29	44	0	1	0	948
2	1	9.21287	2.61695	52.1272	123	140	3.78602	62856.6	106.52	17.02	73.0608	25	0	56	29	44	0	1	0	948
1	3	19.0226	1.84756	15.8523	89	68	2.26309	25447.8	16.03	16.4181	66.6198	32	0	46	9	25.5	1	0	0	666
1	3	9.02122	2.64316	33.1283	110	66	2.57357	25447.8	14.9	16.4181	66.6198	32	0	46	9	25.5	1	1	0	666
2	3	19.0226	1.84756	15.8523	100	83	2.26309	25447.8	16.03	16.4181	66.6198	32	0	46	9	25.5	1	0	0	666
2	3	9.02122	2.64316	33.1283	113	96	2.57357	25447.8	14.9	16.4181	66.6198	32	0	46	9	25.5	1	1	0	666
1	4	9.06229	2.36642	47.8794	108	121	3.89197	56563.1	166.17	17.1502	69.6296	18	0	51	21	36.5	0	1	0	198
2	4	9.06229	2.36642	47.8794	100	127	3.89197	56563.1	166.17	17.1502	69.6296	18	0	51	21	36.5	0	1	0	198
1	7	9.07598	2.46557	16.2493	89	96	4.46012	50375.7	37.84	16.1242	56.2542	25	0	56	25	23	0	1	1	257
2	7	9.07598	2.46557	16.2493	131	81	4.46012	50375.7	37.84	16.1242	56.2542	25	0	56	25	23	0	1	0	257
1	2	9.17728	2.72065	23.5733	71	77	2.57046	21814.6	21.05	18.1492	59.2822	53	0	47	18	32	1	1	1	101
2	2	9.17728	2.72065	23.5733	69	64	2.57046	21814.6	21.05	18.1492	59.2822	53	0	47	18	32	1	1	1	101
1	1	9.16359	2.22958	52.6138	99	127	3.16525	69604.8	29.81	17.6158	58.7975	18	0	51	30	25	0	1	0	696
2	1	9.16359	2.22958	52.6138	99	74	3.16525	69604.8	29.81	17.6158	58.7975	18	0	51	30	25	0	1	0	696
1	1	18.7543	1.08341	7.179	124	118	3.57097	99685	0.34	17.0765	52.169	19	0	56	27	21	0	0	1	619
1	1	9.24025	1.71879	14.541	114	108	3.21409	99685	0.32	17.0765	52.169	19	0	56	27	21	0	1	1	619
2	1	18.7707	1.08341	7.179	115	129	3.57097	99685	0.34	17.0765	52.169	19	0	56	27	21	0	0	1	619
2	1	9.24025	1.71879	14.541	113	119	3.21409	99685	0.32	17.0765	52.169	19	0	56	27	21	0	1	1	619
1	7	9.02943	2.42413	42.6339	68	78	2.70111	45382.1	93.14	17.2975	70.9933	27	0	49	25	21	1	1	1	393
2	7	9.02943	2.42413	42.6339	80	79	2.70111	45382.1	93.14	17.2975	70.9933	27	0	49	25	21	1	1	0	393
1	1	9.21834	2.43661	16.1658	131	103	4.87858	85131.5	6.56	17.5533	56.0411	18	0	56	26	18	0	1	0	680
2	1	9.21834	2.43661	16.1658	132	103	4.87858	85131.5	6.56	17.5533	56.0411	18	0	56	26	18	0	1	0	680
1	1	9.03765	2.41264	41.6945	76	96	2.68363	51520.6	57.47	17.1219	69.015	25	0	54	29	22	0	1	1	375
2	1	9.03765	2.41264	41.6945	139	103	2.68363	51520.6	57.47	17.1219	69.015	25	0	54	29	22	0	1	0	375
1	7	9.16359	2.50882	11.9587	121	136	3.19494	41805.6	4.3	18.3017	58.2096	22		56	27	30	0	1	0	247
2	7	9.16359	2.50882	11.9587	103	133	3.19494	41805.6	4.3	18.3017	58.2096	22		56	27	30	0	1	0	247
1	1	10.3546	2.65495	36.1808	120	125	4.85444	114438	45.62	17.1273	65.1667	26	0	56	28	29	0	1	0	649
2	1	10.3546	2.65495	36.1808	99	104	4.85444	114438	45.62	17.1273	65.1667	26	0	56	28	29	0	1	0	649
1	1	18.6721	1.45053	3.72885	132	130	4.46659	63767.3	7.85	16.3665	51.9192	29	0	56	24	23	0	0	0	429
1	1	9.16085	2.47769	29.2663	124	139	4.228	31399.5	22.99	16.3665	51.9192	29	0	56	24	23	0	1	0	429
2	1	18.6092	1.45981	3.72885	118	113	4.45622	63767.3	7.85	16.3394	52.2796	29	0	56	24	23	0	0	0	429
2	1	9.16085	2.47769	29.2663	118	121	4.228	31399.5	22.99	16.3394	52.2796	29	0	56	24	23	0	1	0	429
1	4	9.03217	2.47214	15.5449	101	94	4.9383	133456	16.89	16.1033	49.4481	19	0	55	24	21	0	1	1	429
2	4	9.03217	2.47214	15.5449	94	105	4.9383	133456	16.89	16.19	49.6672	19	0	55	24	21	0	1	1	429
1	2	18.694	1.76038	19.0174	96	95	2.90272	52578.9	99.62	17.6365	61.454	17	0	42	15	42	0	0	0	624
1	2	9.02669	2.65716	44.325	50	85	3.26344	52578.9	92.6	17.6365	61.454	17	0	42	15	42	0	1	0	624
2	2	18.694	1.76038	19.0174	79	85	2.90272	52578.9	99.62	17.6242	61.351	17	0	42	15	42	0	0	0	624
2	2	9.02669	2.65716	44.325	81	86	3.26344	52578.9	92.6	17.6242	61.351	17	0	42	15	42	0	1	0	624
1	2	9.01574	2.695	22.6029	52	82	2.80369	37440.6	33.27	18.5903	59.6683	40	0	50	23	25.5	1	1	1	934
2	2	9.01574	2.695	22.6029	115	121	2.80369	37440.6	33.27	18.5903	59.6683	40	0	50	23	25.5	1	1	1	934
1	7	18.4613	1.67294	10.2849	109	92	2.76217	41735.8	16.31	17.8156	60.8448	31	0	48	12	42	1	0	0	161
1	7	9.18823	2.66216	21.2645	88	93	3.23784	41735.8	15.16	17.8156	60.8448	31	0	48	12	42	1	1	0	161
2	7	18.4586	1.67294	10.2849	100	74	2.76217	41735.8	16.31	17.8156	60.8448	31	0	48	12	42	1	0	0	161
2	7	9.18823	2.66216	21.2645	86	78	3.23784	41735.8	15.16	17.8156	60.8448	31	0	48	12	42	1	1	0	161
1	1	9.30048	1.54235	15.5343	122	124	3.32358	52479.7	56.51	15.7236	64.2956	23	0	49	15	33	0	1	1	350
2	1	9.30048	1.54235	15.5343	101	129	3.32358	52479.7	56.51	15.6392	65.5775	23	0	49	15	33	0	1	1	350
1	7	9.08693	2.56709	21.2625	108	102	3.47233	80532.7	8.43	16.1762	68.3352	23	0	57	30	33	0	1	1	682
2	7	9.08693	2.56709	21.2625	110	117	3.47233	80532.7	8.43	16.5339	68.3342	23	0	57	30	33	0	1	1	682
1	1	9.14716	1.62399	41.5119	107	84	3.18652	61047.7	244.35	17.161	57.1663	24	0	54	26	26.5	0	1	0	473
2	1	9.14716	1.62399	41.5119	98	98	3.18652	61047.7	244.35	17.1871	56.7723	24	0	54	26	26.5	0	1	0	473
1	2	9.88912	2.14637	8.12435	90	75	2.78941	39811.1	72.78	17.5487	71.4583	18	0	54	20	21	1	1	1	527
2	2	9.88912	2.14637	8.12435	73	63	2.78941	39811.1	72.78	17.5487	71.4583	18	0	54	20	21	1	1	0	527
1	7	9.01848	2.67483	45.2839	101	99	2.57624	59783.3	12.76	17.7646	70.3158	22	0	64	25	43.5	0	1	0	206
2	7	9.01848	2.67483	45.2839	114	94	2.57624	59783.3	12.76	17.7646	70.3158	22	0	64	25	43.5	0	1	0	206
1	7	9.10609	2.33816	56.6176	119	96	2.63984	53313.7	145.87	17.615	72.9192	26	0	56	29	36	1	1	0	891
2	7	9.10609	2.33816	56.6176	118	98	2.63984	53313.7	145.87	17.615	72.9192	26	0	56	29	36	1	1	0	891
1	2	9.3744	2.30172	31.7301	90	99	2.54703	37919.4	102.3	17.4464	69.5975	27	0	55	25	33	1	1	1	399
2	2	9.3744	2.30172	31.7301	82	99	2.54703	37919.4	102.3	17.4464	69.5975	27	0	55	25	33	1	1	1	399
1	1	9.28131	2.6725	44.1322	108	112	3.65602	47511.8	22.59	18.5246	60.9375	26	0	56	29	21	0	1	0	473
2	1	9.28131	2.6725	44.1322	92	140	3.65602	47511.8	22.59	18.5246	60.9375	26	0	56	29	21	0	1	0	473
1	1	9.02669	2.56697	49.09	102	79	2.82077	41220.9	50.68	17.5586	69.6306	60	1	53	27	44.5	1	1	1	190
2	1	9.02669	2.56697	49.09	111	99	2.82077	41220.9	50.68	17.5586	69.6306	60	1	53	27	44.5	1	1	0	190
1	2	9.02669	2.68757	53.193	97	112	2.3938	28611.4	227.9	18.2473	59.8127	29	0	44	15	37	1	1	1	306
2	2	9.02669	2.68757	53.193	98	78	2.3938	28611.4	227.9	18.2473	59.8127	29	0	44	15	37	1	1	1	306
1	7	9.00753	2.13498	38.9797	101	95	3.9	77175.1	58.95	14.6933	51.6283	20	0	54	27	54	1	1	1	281
2	7	9.00753	2.13498	38.9797	102	109	3.9	77175.1	58.95	14.6933	51.6283	20	0	54	27	54	1	1	0	281
1	2	18.7707	1.75651	16.3359	115	119	1.92574	20233.7	14.24	17.7165	63.8873	40	0	57	22	25.5	1	0	1	940
1	2	9.51677	2.68922	34.4988	107	111	2.31734	20233.7	13.23	17.7165	63.8873	40	0	57	22	25.5	1	1	1	940
2	2	18.7543	1.75651	16.3359	93	88	1.92574	20233.7	14.24	17.7165	63.8873	40	0	57	22	25.5	1	0	1	940
2	2	9.51677	2.68922	34.4988	95	82	2.31734	20233.7	13.23	17.7165	63.8873	40	0	57	22	25.5	1	1	1	940
1	1	9.03217	2.54294	27.7703	111	134	2.98753	32098	40	18.3754	61.2552	22	0	56	21	30	0	1	1	349
2	1	18.3135	1.68805	13.9603	106	130	2.67663	32098	43.05	18.3754	61.2552	22	0	56	21	30	0	0	1	349
2	1	9.03217	2.54294	27.7703	107	122	2.98753	32098	40	18.3754	61.2552	22	0	56	21	30	0	1	1	349
1	1	18.7461	1.30557	15.2169	93	89	4.06183	71797	111.01	17.4371	59.716	25	0	53	24	38	0	0	0	252
1	1	9.31417	2.19457	86.808	100	87	2.92976	79990	28.4	17.4371	59.716	25	0	53	24	38	0	1	0	252
2	1	18.768	1.39931	8.70835	110	123	3.57212	89139.5	82.69	17.4688	59.6404	25	0	53	24	38	0	0	0	252
2	1	9.31417	2.19457	86.808	112	108	2.92976	79990	28.4	17.4688	59.6404	25	0	53	24	38	0	1	0	252
1	7	18.4175	1.6164	10.7652	92	78	2.29598	50317.3	27.06	17.2567	69.1102	17	0	48	23	26	0	0	1	932
1	7	9.14716	2.35918	23.101	111	100	2.63258	50317.3	25.3	17.2567	69.1102	17	0	48	23	26	0	1	1	932
2	7	18.3765	1.6164	10.7652	106	85	2.29598	50317.3	27.06	17.5347	69.93	17	0	48	23	26	0	0	1	932
2	7	9.14716	2.35918	23.101	115	96	2.63258	50317.3	25.3	17.5347	69.93	17	0	48	23	26	0	1	1	932
1	2	19.4004	1.94821	7.24165	99	85	2.34993	35594.5	45.88	18.0108	63.2783	21	0	50	25	37	1	0	0	580
1	2	9.22656	2.67739	15.4375	96	107	2.73316	35594.5	42.64	18.0108	63.2783	21	0	50	25	37	1	1	0	580
2	2	19.2827	1.91972	7.24165	99	104	2.35653	35594.5	45.88	18.0108	63.2783	21	0	50	25	37	1	0	0	580
2	2	9.22656	2.67739	15.4375	100	101	2.73316	35594.5	42.64	18.0108	63.2783	21	0	50	25	37	1	1	0	580
1	2	18.7351	1.70746	6.35885	87	110	3.69595	47909.6	8.71	18.3439	59.0936	22	0	51	19	27	1	0	0	490
1	2	9.28679	2.63858	13.2599	77	99	4.01009	47909.6	8.04	18.3439	59.0936	22	0	51	19	27	1	1	0	490
2	2	9.28679	2.63858	13.2599	93	91	4.01009	47909.6	8.04	18.3439	59.0936	22	0	51	19	27	1	1	0	490
1	2	9.84805	2.59675	18.8612	114	93	3.58453	38878.4	77.39	18.2369	58.9227	25	0	57	22	35.5	1	1	0	236
2	2	19.1485	1.65726	9.17515	111	72	3.20662	38878.4	83.27	18.2394	58.7831	25	0	57	22	35.5	1	0	0	236
2	2	9.84805	2.59675	18.8612	104	93	3.58453	38878.4	77.39	18.2394	58.7831	25	0	57	22	35.5	1	1	0	236
1	7	9.02396	2.62179	16.6245	105	102	2.89302	46213.5	10.21	18.2069	60.5613	21	0	54	26	31	1	1	0	699
2	7	9.02396	2.62179	16.6245	97	90	2.89302	46213.5	10.21	18.2069	60.5613	21	0	54	26	31	1	1	0	699
1	1	18.2615	1.60442	30.303	109	105	3.4401	70107.1	279.36	17.2888	70.6033	17	0	55	29	16.5	0	0	0	605
1	1	9.01574	2.44824	33.0055	101	90	3.05851	68385.9	61.77	17.2888	70.6033	17	0	55	29	16.5	0	1	0	605
2	1	18.3299	1.59514	30.303	105	91	3.46199	70107.1	279.36	17.2888	70.6033	17	0	55	29	16.5	0	0	0	605
2	1	9.01574	2.44824	33.0055	109	102	3.05851	68385.9	61.77	17.2888	70.6033	17	0	55	29	16.5	0	1	0	605
1	7	18.245	1.52953	27.0726	114	101	2.80948	45827.6	85.9	18.1431	61.2633	24	0	55	27	29	0	0	1	885
1	7	9.00753	2.40468	54.7388	103	110	3.20167	45827.6	86.7	18.1431	61.2633	24	0	55	27	29	0	1	1	885
2	7	18.256	1.52953	27.0726	124	112	2.80948	45827.6	85.9	18.1431	61.2633	24	0	55	27	29	0	0	1	885
2	7	9.00753	2.40468	54.7388	114	112	3.20167	45827.6	86.7	18.1431	61.2633	24	0	55	27	29	0	1	1	885
1	1	18.2998	1.35489	6.3851	116	113	4.5566	79085.5	0.81	18.3848	57.3744	32	1	53	25	35	0	0	0	958
1	1	9.06502	2.38891	12.6521	108	108	5.28263	79085.5	0.75	18.3848	57.3744	32	1	53	25	35	0	1	0	958
2	1	18.5407	1.41924	6.3851	94	100	4.53471	79085.5	0.81	18.3848	57.3744	32	1	53	25	35	0	0	0	958
2	1	9.06502	2.38891	12.6521	101	110	5.28263	79085.5	0.75	18.3848	57.3744	32	1	53	25	35	0	1	0	958
1	4	9.13621	2.25969	24.86	82	83	3.10728	38106.5	125.46	17.7578	59.2825	18	0	54	22	28	1	1	1	568
2	4	9.13621	2.25969	24.86	101	92	3.10728	38106.5	125.46	17.7578	59.2825	18	0	54	22	28	1	1	1	568
1	2	9.06502	3.00185	60.942	91	87	3.17122	57359.2	58.45	17.6621	62.6696	24	0	52	21	34	1	1	0	540
2	2	9.06502	3.00185	60.942	98	105	3.17122	57359.2	58.45	17.6621	62.6696	24	0	52	21	34	1	1	0	540
1	7	9.19644	1.77359	7.0736	98	102	3.93426	64467.9	0.28	17.4796	51.7827	17	0	56	26	29	0	1	1	420
2	7	9.19644	1.77359	7.0736	95	115	3.93426	64467.9	0.28	17.4281	51.9119	17	0	56	26	29	0	1	1	420
1	2	19.4689	1.99173	27.3224	115	104	2.10003	17833.8	12.21	17.4787	67.5421	70	0	57	23	33	1	0	1	607
1	2	9.1499	2.71985	24.7731	108	78	2.22696	25607.3	55.61	17.4787	67.5421	70	0	57	23	33	1	1	1	607
2	2	9.1499	2.71985	24.7731	130	95	2.22696	25607.3	55.61	17.4787	67.5421	70	0	57	23	33	1	1	0	607
1	1	18.4969	0.250456	0.5409	107	108	1.24875	34192.5	5.87	17.7369	50.4928	33	1	55	27	25	1	0	0	263
1	1	9.07324	2.27537	33.6224	107	101	3.53247	47172.1	8.12	17.7369	50.4928	33	1	55	27	25	1	1	0	263
2	1	18.4449	0.232611	0.36985	91	94	1.28442	33252.4	1.48	17.7125	50.2403	33	1	55	27	25	1	0	0	263
2	1	9.07324	2.27537	33.6224	99	98	3.53247	47172.1	8.12	17.7125	50.2403	33	1	55	27	25	1	1	0	263
1	2	9.08693	2.56113	30.283	90	102	3.49427	60364.2	124.81	17.4025	63.8972	30	1	53	23	37	1	1	1	603
2	2	9.08693	2.56113	30.283	92	126	3.49427	60364.2	124.81	17.2863	63.9131	30	1	53	23	37	1	1	1	603
1	1	9.12252	2.24349	31.5361	135	115	4.44666	58745.7	6.65	17.8642	55.7117	22	0	56	26	37	0	1	0	757
2	1	9.12252	2.24349	31.5361	120	89	4.44666	58745.7	6.65	17.8642	55.7117	22	0	56	26	37	0	1	0	757
1	2	19.5811	1.89764	18.9055	80	88	2.34675	33831.1	33.64	16.4542	68.4089	36	0	55	19	26.5	1	0	1	964
1	2	9.80151	2.56383	29.7781	54	104	2.91801	50884.4	136.1	16.4542	68.4089	36	0	55	19	26.5	1	1	1	964
2	2	19.5811	1.89764	18.9055	93	110	2.34675	33831.1	33.64	16.4542	68.4089	36	0	55	19	26.5	1	0	1	964
2	2	9.80151	2.56383	29.7781	88	113	2.91801	50884.4	136.1	16.4542	68.4089	36	0	55	19	26.5	1	1	1	964
1	1	9.11157	2.66739	17.2587	146	137	4.56234	96839.6	113.1	18.5069	59.7775	27	0	54	20	19	0	1	1	537
2	1	9.11157	2.66739	17.2587	140	145	4.56234	96839.6	113.1	18.5692	59.4297	27	0	54	20	19	0	1	0	537
1	7	18.2642	1.64188	12.3126	108	125	2.99784	57588.6	44.7	16.475	67.2773	21	0	52	23	37	0	0	1	100
1	7	9.17454	2.51137	26.0155	110	123	3.16024	57588.6	41.55	16.475	67.2773	21	0	52	23	37	0	1	1	100
2	7	18.2505	1.64188	12.3126	111	131	2.99784	57588.6	44.7	16.475	67.2773	21	0	52	23	37	0	0	1	100
2	7	9.17454	2.51137	26.0155	97	134	3.16024	57588.6	41.55	16.475	67.2773	21	0	52	23	37	0	1	1	100
1	3	18.2423	1.75007	22.5389	89	71	2.45936	35122.7	120.47	18.0492	60.9714	23	0	43	5	48	1	0	0	706
1	3	9.10609	2.65668	48.334	106	91	2.75614	35122.7	111.97	18.0492	60.9714	23	0	43	5	48	1	1	0	706
2	3	18.2396	1.75007	22.5389	97	86	2.45936	35122.7	120.47	18.0492	60.9714	23	0	43	5	48	1	0	0	706
2	3	9.10609	2.65668	48.334	105	71	2.75614	35122.7	111.97	18.0492	60.9714	23	0	43	5	48	1	1	0	706
1	3	18.2752	1.60983	5.71385	110	88	3.12397	77061.2	77.32	18.3423	62.1921	32	0	55	25	21.5	0	0	0	158
1	3	9.14716	2.45688	55.9303	114	103	3.51488	68217.1	81.01	18.3423	62.1921	32	0	55	25	21.5	0	1	0	158
2	3	18.3107	1.60055	5.71385	85	100	3.10291	77061.2	77.32	18.3423	62.1921	32	0	55	25	21.5	0	0	0	158
2	3	9.14716	2.45688	55.9303	112	97	3.51488	68217.1	81.01	18.3423	62.1921	32	0	55	25	21.5	0	1	0	158
1	1	9.48939	1.86671	16.7895	118	112	3.44781	90432.1	13.28	17.5381	66.1031	20	0	54	21	23	0	1	1	712
2	1	9.48939	1.86671	16.7895	101	100	3.44781	90432.1	13.28	17.5381	66.1031	20	0	54	21	23	0	1	1	712
1	1	9.20739	2.55235	59.0478	82	94	2.29093	41207.6	216.1	18.7179	59.6692	28	1	54	25	37	0	1	0	33
2	1	9.20739	2.55235	59.0478	94	110	2.29093	41207.6	216.1	18.7179	59.6692	28	1	54	25	37	0	1	0	33
1	4	18.6119	1.47507	6.6931	120	114	2.69348	45429.3	5.75	18.7883	57.0378	17	0	41	17	28	0	0	1	171
1	4	9.18823	2.45071	13.678	133	122	3.16819	45429.3	5.34	18.7883	57.0378	17	0	41	17	28	0	1	1	171
2	4	9.18823	2.45071	13.678	101	117	3.16819	45429.3	5.34	18.7883	57.0378	17	0	41	17	28	0	1	1	171
1	7	9.01848	2.66544	18.0314	81	99	3.11611	31424.5	9.57	19.0508	61.695	35	0	54	28	21	0	1	0	613
2	7	9.01848	2.66544	18.0314	128	94	3.11611	31424.5	9.57	19.0508	61.695	35	0	54	28	21	0	1	0	613
1	7	18.2094	1.79416	11.42	69	67	2.33591	24105.6	73.24	18.0065	61.2275	20	1	54	24	34.5	1	0	1	440
1	7	9.00205	2.67745	15.0763	55	72	2.96972	33844.4	35.76	18.0065	61.2275	20	1	54	24	34.5	1	1	1	440
2	7	18.0753	1.77679	11.42	103	97	2.33666	24105.6	73.24	18.0065	61.2275	20	1	54	24	34.5	1	0	1	440
2	7	9.00205	2.67745	15.0763	82	83	2.96972	33844.4	35.76	18.0065	61.2275	20	1	54	24	34.5	1	1	1	440
1	3	18.7023	1.88614	6.56875	107	106	2.53776	41009.5	96.52	18.6942	60.6075	35	0	55	28	39.5	0	0	1	392
1	3	9.01027	2.69611	87.7832	122	111	2.51512	23292.5	880.18	18.6942	60.6075	35	0	55	28	39.5	0	1	1	392
2	3	18.141	1.74642	6.56875	98	96	2.54054	41009.5	96.52	18.3775	60.9942	35	0	55	28	39.5	0	0	0	392
2	3	9.01027	2.69611	87.7832	109	118	2.51512	23292.5	880.18	18.3775	60.9942	35	0	55	28	39.5	0	1	0	392
1	4	18.2122	1.27853	5.9757	107	109	3.1853	51122.7	82.05	17.5125	54.3719	22	0	54	27	33	0	0	0	757
1	4	9.03491	2.12572	11.036	124	118	3.48776	48967	11	17.5125	54.3719	22	0	54	27	33	0	1	0	757
2	4	18.2149	1.27853	5.9757	120	95	3.1853	51122.7	82.05	17.5125	54.3719	22	0	54	27	33	0	0	0	757
2	4	9.03491	2.12572	11.036	108	98	3.48776	48967	11	17.5125	54.3719	22	0	54	27	33	0	1	0	757
1	1	9.01027	2.40139	15.5206	114	98	4.791	87821.2	6.64	16.365	43.7485	25	0	54	23	42	0	1	0	938
2	1	9.01027	2.40139	15.5206	134	115	4.791	87821.2	6.64	16.365	43.7485	25	0	54	23	42	0	1	0	938
1	1	18.4832	1.35542	4.92215	114	104	3.09576	64482.7	8.36	17.6238	56.2056	29	0	69	26	27.5	0	0	1	948
1	1	9.21013	2.13903	17.7347	111	102	3.44303	45424.2	43.08	17.6238	56.2056	29	0	69	26	27.5	0	1	1	948
2	1	9.21013	2.13903	17.7347	114	112	3.44303	45424.2	43.08	17.6238	56.2056	29	0	69	26	27.5	0	1	0	948
1	7	9.08419	1.82722	19.2581	122	87	3.3263	38323.9	70.77	17.2921	53.4935	21	0	54	18	30	0	1	0	120
2	7	18.0835	1.1335	6.13915	110	91	2.90476	54385.7	37.7	17.2921	53.4935	21	0	54	18	30	0	0	0	120
2	7	9.08419	1.82722	19.2581	129	102	3.3263	38323.9	70.77	17.2921	53.4935	21	0	54	18	30	0	1	0	120
1	2	9.22656	2.36956	12.2986	133	132	4.31505	80043.3	3.22	19.0271	61.4733	17	0	56	26	34.5	1	1	1	796
2	2	18.2615	1.5993	9.78515	121	123	3.90331	51508.1	80.13	19.0119	59.5433	17	0	56	26	34.5	1	0	0	796
2	2	9.22656	2.36956	12.2986	129	129	4.31505	80043.3	3.22	19.0119	59.5433	17	0	56	26	34.5	1	1	0	796
1	2	18.5079	1.76116	17.7045	108	111	2.20955	35657.2	99.68	16.8472	69.4753	27	0	52	26	49.5	1	0	0	198
1	2	9.26215	2.39054	19.7973	123	101	2.89722	45700.1	90.13	16.8472	69.4753	27	0	52	26	49.5	1	1	0	198
2	2	18.5298	1.76116	17.7615	110	110	2.20955	35657.2	102.77	16.8472	69.4753	27	0	52	26	49.5	1	0	0	198
2	2	9.26215	2.39054	19.7973	114	114	2.89722	45700.1	90.13	16.8472	69.4753	27	0	52	26	49.5	1	1	0	198
1	3	10.4038	2.59671	49.407	109	110	3.14837	28210.6	10.08	18.205	65.9758	42	0	49	17	52	0	1	1	470
2	3	10.4038	2.59671	49.407	114	117	3.14837	28210.6	10.08	18.205	65.9758	42	0	49	17	52	0	1	0	470
1	4	9.19918	2.47875	20.7837	113	104	3.67268	54072	75.87	18.0217	60.8433	28	0	55	29	24	0	1	1	443
2	4	9.19918	2.47875	20.7837	93	124	3.67268	54072	75.87	18.0217	60.8433	28	0	55	29	24	0	1	1	443
1	2	9.9822	2.53432	23.0812	89	117	3.43755	42414.6	33.13	18.0925	65.9092	29	0	49	25	38	1	1	1	734
2	2	9.9822	2.53432	23.0812	83	88	3.43755	42414.6	33.13	18.1878	64.4808	29	0	49	25	38	1	1	1	734
1	2	9.08419	2.67098	39.0316	114	112	2.64275	11860.2	91.43	17.605	68.6067	40	0	50	21	40	1	1	0	841
2	2	9.08419	2.67098	39.0316	123	112	2.64275	11860.2	91.43	17.605	68.6067	40	0	50	21	40	1	1	0	841
1	7	18.1081	1.61593	15.2279	103	88	3.54705	69293.6	87.38	17.1075	69.5017	24	0	53	24	35	0	0	0	966
1	7	9.00753	2.40494	28.7704	94	97	3.39557	51150.3	82.55	17.1075	69.5017	24	0	53	24	35	0	1	0	966
2	7	18.1492	1.64257	15.2279	88	76	3.55861	69293.6	87.38	17.1075	69.5017	24	0	53	24	35	0	0	0	966
2	7	9.00753	2.40494	28.7704	94	97	3.39557	51150.3	82.55	17.1075	69.5017	24	0	53	24	35	0	1	0	966
1	2	19.0965	1.73261	7.3093	129	125	3.4641	77165.7	14.44	17.6667	62.0702	28	0	56	25	32.5	0	0	0	699
1	2	9.97125	2.73725	12.9374	116	103	3.77339	77165.7	11.71	17.6667	62.0702	28	0	56	25	32.5	0	1	0	699
2	2	19.0691	1.73261	7.3093	110	108	3.4641	77165.7	14.44	17.6667	62.0702	28	0	56	25	32.5	0	0	0	699
2	2	9.97125	2.73725	12.9374	107	111	3.77339	77165.7	11.71	17.6667	62.0702	28	0	56	25	32.5	0	1	0	699
1	3	19.2526	1.81161	24.6197	84	98	2.71571	51612.6	6.68	16.4964	71.1042	36	0			61	0	0	0	822
1	3	9.9165	2.60571	18.2272	81	91	3.16798	40534.9	28.3	16.4964	71.1042	36	0			61	0	1	0	822
2	3	19.2526	1.81161	24.6197	103	96	2.71571	51612.6	6.68	16.4964	71.1042	36	0			61	0	0	0	822
2	3	9.9165	2.60571	18.2272	86	99	3.16798	40534.9	28.3	16.4964	71.1042	36	0			61	0	1	0	822
1	1	9.98768	2.05895	4.39025	114	97	4.20797	102904	0.42	17.5442	54.1417	18	0	55	26	23	0	1	1	36
2	1	9.98768	2.05895	4.39025	110	90	4.20797	102904	0.42	17.8114	53.6483	18	0	55	26	23	0	1	0	36
1	1	9.43463	1.61643	5.0713	66	114	2.57049	83615.4	42.97	17.5583	53.6783	23	0	50	24	24	0	1	1	767
2	1	9.43463	1.61643	5.0713	80	97	2.57049	83615.4	42.97	17.5583	53.6783	23	0	50	24	24	0	1	1	767
1	2	9.13895	2.47917	23.8561	95	130	3.60301	55324.3	78.89	18.83	67.9467	40	0	50	22	23	1	1	0	89
2	2	9.13895	2.47917	23.8561	101	113	3.60301	55324.3	78.89	18.83	67.9467	40	0	50	22	23	1	1	0	89
1	2	19.8713	1.89728	33.0841	111	93	3.32527	83905.4	20.13	16.806	59.8654	58	0	52	23	32	0	0	1	90
1	2	10.6694	2.83511	51.8094	110	96	3.32982	36011.6	27.52	16.806	59.8654	58	0	52	23	32	0	1	1	90
2	2	19.8713	1.89728	33.0841	104	91	3.32527	83905.4	20.13	16.806	59.8654	58	0	52	23	32	0	0	1	90
2	2	10.6694	2.83511	51.8094	111	106	3.32982	36011.6	27.52	16.806	59.8654	58	0	52	23	32	0	1	1	90
1	3	19.3018	1.82827	15.5751	100	82	2.88516	32838.2	40.43	17.4729	70.3052	28	0	51	22	40	1	0	1	329
1	3	10.7132	2.57853	32.0329	109	89	3.38403	32838.2	37.57	17.4729	70.3052	28	0	51	22	40	1	1	1	329
2	3	19.2991	1.82827	15.5751	112	103	2.88516	32838.2	40.43	17.4729	70.3052	28	0	51	22	40	1	0	1	329
2	3	10.7132	2.57853	32.0329	99	93	3.38403	32838.2	37.57	17.4729	70.3052	28	0	51	22	40	1	1	1	329
1	2	9.22382	2.3582	21.3259	94	91	3.00579	51911.3	67.63	16.8202	45.7135	29	0	40	11	25	1	1	0	97
2	2	9.22382	2.3582	21.3259	70	72	3.00579	51911.3	67.63	16.8202	45.7135	29	0	40	11	25	1	1	0	97
1	2	9.12526	2.39061	25.6513	102	129	2.73913	38604.7	70.94	17.5263	70.8242	32	0			37	1	1	0	111
2	2	9.12526	2.39061	25.6513	106	125	2.73913	38604.7	70.94	17.5263	70.8242	32	0			37	1	1	0	111
1	2	18.1848	1.7615	25.6113	107	83	1.98729	16536.6	53.03	18.3353	60.0575	18	0	56	25	32	1	0	1	163
1	2	9.10609	2.67902	51.8909	117	101	2.21181	16536.6	49.28	18.3353	60.0575	18	0	56	25	32	1	1	1	163
2	2	9.10609	2.67902	51.8909	98	94	2.21181	16536.6	49.28	18.1965	60.1742	18	0	56	25	32	1	1	0	163
1	7	18.9514	1.35663	13.4263	98	87	2.88478	46932.4	9.56	16.5029	52.6992	17	0	52	25	27	0	0	1	584
1	7	10.1328	2.16647	25.722	102	85	3.48927	54573.8	15.41	16.5029	52.6992	17	0	52	25	27	0	1	1	584
2	7	18.9651	1.35663	13.4263	109	67	2.88478	46932.4	9.56	16.5194	52.4944	17	0	52	25	27	0	0	0	584
2	7	10.1328	2.16647	25.722	103	85	3.48927	54573.8	15.41	16.5194	52.4944	17	0	52	25	27	0	1	0	584
1	7	10.0589	1.34612	3.6238	122	137	2.59701	73213.6	22.44	17.2286	43.5867	27	0	71	30	37	0	1	1	118
2	7	18.9952	0.787124	1.90025	103	109	2.29489	73213.6	23.37	17.2286	43.5867	27	0	71	30	37	0	0	1	118
2	7	10.0589	1.34612	3.6238	111	105	2.59701	73213.6	22.44	17.2286	43.5867	27	0	71	30	37	0	1	1	118
1	3	10.9185	2.68218	28.1091	79	85	2.68689	21493.7	32.69	18.1938	61.9221	32	0	53	21	32.5	0	1	0	935
2	3	19.4168	1.83464	6.59035	83	87	2.40085	34357.3	69.35	18.1938	61.9221	32	0	53	21	32.5	0	0	0	935
2	3	10.9185	2.68218	28.1091	86	86	2.68689	21493.7	32.69	18.1938	61.9221	32	0	53	21	32.5	0	1	0	935
1	7	19.1266	1.85143	19.2123	69	84	2.33533	20058	136.96	17.9558	63.1025	9	0	53	24	52	1	0	0	827
1	7	10.6366	2.64979	38.0787	77	77	2.74924	20058	136.42	17.9558	63.1025	9	0	53	24	52	1	1	0	827
2	7	19.0418	1.85092	19.2123	62	87	2.34995	20058	136.96	17.9558	63.1025	9	0	53	24	52	1	0	0	827
2	7	10.6366	2.64979	38.0787	59	91	2.74924	20058	136.42	17.9558	63.1025	9	0	53	24	52	1	1	0	827
1	1	18.1109	1.71518	4.33915	123	115	1.7825	88593.1	42.82	16.3721	68.8529	25	0	55	26	19.5	0	0	0	713
1	1	9.07871	2.4472	8.60365	127	106	1.85719	88593.1	39.8	16.3721	68.8529	25	0	55	26	19.5	0	1	0	713
2	1	18.037	1.6682	4.33915	110	113	1.78003	88593.1	42.82	16.7519	69.2758	25	0	55	26	19.5	0	0	0	713
2	1	9.07871	2.4472	8.60365	121	106	1.85719	88593.1	39.8	16.7519	69.2758	25	0	55	26	19.5	0	1	0	713
1	2	9.21013	2.70051	67.3751	71	80	2.18082	16536.6	193.75	18.2264	60.3814	25	0	55	27	28.5	1	1	1	536
2	2	9.21013	2.70051	67.3751	73	79	2.18082	16536.6	193.75	18.2264	60.3814	25	0	55	27	28.5	1	1	0	536
1	2	10.3847	2.58225	72.4987	100	84	2.45626	34192.2	83.73	17.2221	69.4963	30	0	54	30	32	1	1	0	954
2	2	10.3847	2.58225	72.4987	120	123	2.45626	34192.2	83.73	17.136	69.5212	30	0	54	30	32	1	1	0	954
1	7	9.68925	2.3921	27.2186	93	79	3.22011	41094.1	83.9	17.9075	74.1554	30	0	56	26	27	1	1	0	525
2	7	9.68925	2.3921	27.2186	78	94	3.22011	41094.1	83.9	17.9075	74.1554	30	0	56	26	27	1	1	0	525
1	3	9.10335	2.62531	15.924	117	119	3.41116	55411.3	15.21	16.3829	66.8504	20	0	54	16	18.5	0	1	1	464
2	3	9.10335	2.62531	15.924	118	101	3.41116	55411.3	15.21	16.3829	66.8504	20	0	54	16	18.5	0	1	0	464
1	2	19.1951	1.78311	24.592	103	119	2.08698	27784.1	91.86	18.0583	61.0831	23	0	54	21	36.5	1	0	1	816
1	2	10.9952	2.69027	49.1845	103	84	2.4532	27784.1	85.38	18.0583	61.0831	23	0	54	21	36.5	1	1	1	816
2	2	19.1786	1.78311	24.592	82	99	2.08698	27784.1	91.86	18.0583	61.0831	23	0	54	21	36.5	1	0	0	816
2	2	10.9952	2.69027	49.1845	80	92	2.4532	27784.1	85.38	18.0583	61.0831	23	0	54	21	36.5	1	1	0	816
1	2	10.9076	2.57761	6.89575	93	99	2.78864	54671	18.1	16.8035	61.199	23	1	55	26	40.5	0	1	1	424
2	2	19.5674	1.24829	3.2073	98	113	2.16404	43736.2	0.17	16.8035	61.199	23	1	55	26	40.5	0	0	0	424
2	2	10.9076	2.57761	6.89575	94	75	2.78864	54671	18.1	16.8035	61.199	23	1	55	26	40.5	0	1	0	424
1	2	9.31964	2.39754	24.8059	112	80	2.69095	29264	131.52	18.265	59.3642	33	0	51	24	40	1	1	1	307
2	2	9.31964	2.39754	24.8059	112	120	2.69095	29264	131.52	18.265	59.3642	33	0	51	24	40	1	1	0	307
1	3	9.03217	2.67489	26.9331	86	66	2.63916	27460.2	15.39	17.9781	62.3583	25		47	10	23	1	1	0	173
2	3	9.03217	2.67489	26.9331	71	68	2.63916	27460.2	15.39	17.9781	62.3583	25		47	10	23	1	1	0	173
1	1	18.1164	1.70508	18.5863	126	127	2.7283	49478.5	51.14	17.7744	65.8719	21	0	56	29	20	1	0	1	925
1	1	9.02669	2.50694	35.1885	136	129	3.00096	49478.5	45.8	17.7744	65.8719	21	0	56	29	20	1	1	1	925
2	1	18.2642	1.71447	18.5863	121	108	2.71904	49478.5	51.14	17.7744	65.8719	21	0	56	29	20	1	0	0	925
2	1	9.02669	2.50694	35.1885	118	122	3.00096	49478.5	45.8	17.7744	65.8719	21	0	56	29	20	1	1	0	925
1	7	19.1184	1.75359	12.8507	132	91	3.31336	44541.7	127.7	18.2223	60.0723	32	0	55	25	29	0	0	0	772
1	7	10.3792	2.67678	25.0089	119	99	3.65276	44541.7	118.68	18.2223	60.0723	32	0	55	25	29	0	1	0	772
2	7	19.0965	1.75416	12.8507	118	70	3.32367	44541.7	127.7	18.2223	60.0723	32	0	55	25	29	0	0	0	772
2	7	10.3792	2.67678	25.0089	113	84	3.65276	44541.7	118.68	18.2223	60.0723	32	0	55	25	29	0	1	0	772
1	1	19.4689	1.42181	13.41	125	119	2.85318	46932.4	31.62	18.3429	59.9196	21	0	55	25	30	0	0	1	200
1	1	10.3819	2.61438	24.432	110	120	3.05348	58010.5	89.37	18.3429	59.9196	21	0	55	25	30	0	1	1	200
2	1	10.3819	2.61438	24.432	120	103	3.05348	58010.5	89.37	17.78	59.46	21	0	55	25	30	0	1	0	200
1	3	10.7379	2.73	37.7028	80	75	2.10855	24239.2	21.38	17.2358	68.7837	27	1	45	16	41	1	1	1	193
2	3	10.7379	2.73	37.7028	82	98	2.10855	24239.2	21.38	17.2358	68.7837	27	1	45	16	41	1	1	1	193
1	3	18.2888	1.77294	8.9821	102	84	3.07395	33545.6	141.78	18.3789	60.2356	17	0	47	18	30	0	0	1	107
1	3	9.7577	2.69501	17.5666	107	89	3.3325	33545.6	131.78	18.3789	60.2356	17	0	47	18	30	0	1	1	107
2	3	18.2888	1.77294	8.9821	112	108	3.07395	33545.6	141.78	18.3789	60.2356	17	0	47	18	30	0	0	0	107
2	3	9.7577	2.69501	17.5666	112	104	3.3325	33545.6	131.78	18.3789	60.2356	17	0	47	18	30	0	1	0	107
1	2	19.4387	1.79686	12.4681	102	122	3.40993	53071.6	24.42	17.7629	61.29	21	0	53	18	26	1	0	1	585
1	2	9.87817	2.65677	26.7168	98	108	3.83971	53071.6	22.69	17.7629	61.29	21	0	53	18	26	1	1	1	585
2	2	19.4278	1.79686	12.4681	92	113	3.40993	53071.6	24.42	17.7629	61.29	21	0	53	18	26	1	0	1	585
2	2	9.87817	2.65677	26.7168	90	128	3.83971	53071.6	22.69	17.7629	61.29	21	0	53	18	26	1	1	1	585
1	2	10.0342	2.74552	29.4537	85	93	1.95853	16239.1	134.62	18.3358	60.8708	59		46	16	30	1	1	0	51
2	2	10.0342	2.74552	29.4537	68	90	1.95853	16239.1	134.62	18.3358	60.8708	59		46	16	30	1	1	0	51
1	2	10.7433	2.70363	30.2982	100	101	2.64397	33831.1	118.66	17.6875	61.4158	36	0	47	16	42	1	1	0	283
2	2	10.7433	2.70363	30.2982	105	91	2.64397	33831.1	118.66	17.6875	61.4158	36	0	47	16	42	1	1	0	283
1	3	19.1102	1.74323	9.7157	100	84	2.64981	43421.8	27.75	16.9294	69.4923	23	0	47	19	30	0	0	1	892
1	3	10.5243	2.47799	62.8693	107	88	2.1671	52647.4	10.68	16.9294	69.4923	23	0	47	19	30	0	1	1	892
2	3	10.5243	2.47799	62.8693	112	97	2.1671	52647.4	10.68	16.9294	69.4923	23	0	47	19	30	0	1	1	892
1	2	19.0582	1.41067	13.2348	101	90	2.90067	36494.1	111.94	17.7679	64.2435	25	0	47	24	29	0	0	1	594
1	2	10.3463	2.59538	83.7356	102	88	2.64045	35926.8	656.18	17.7679	64.2435	25	0	47	24	29	0	1	1	594
2	2	19.0527	1.64515	11.8832	89	92	3.12857	60957.8	16.05	17.7679	64.2435	25	0	47	24	29	0	0	1	594
2	2	10.3463	2.59538	83.7356	101	72	2.64045	35926.8	656.18	17.7679	64.2435	25	0	47	24	29	0	1	1	594
1	3	19.0883	1.33342	3.46395	57	45	2.74107	66270.5	41.49	17.4111	52.6142	16	0	52	22	20.5	0	0	0	53
2	3	19.0883	1.33342	3.46395	96	93	2.74107	66270.5	41.49	17.2483	54.2458	16	0	52	22	20.5	0	0	0	53
2	3	10.6393	2.07361	7.33745	99	104	2.98454	66270.5	38.56	17.2483	54.2458	16	0	52	22	20.5	0	1	0	53
1	3	10.8118	2.71397	43.346	88	84	2.44848	26425.6	65.32	17.2996	71.8825	10	1	49	20	32	1	1	0	643
1	1	10.2779	2.66211	16.7261	118	103	3.71769	40765.8	8.91	17.996	59.254	28	0	56	23	21.5	0	1	1	939
2	1	17.8754	1.66856	8.84395	119	86	3.5491	40765.8	9.87	17.996	59.254	28	0	56	23	21.5	0	0	1	939
2	1	10.2779	2.66211	16.7261	97	85	3.71769	40765.8	8.91	17.996	59.254	28	0	56	23	21.5	0	1	1	939
1	1	9.46749	2.6697	43.8793	90	80	3.60197	59286.6	9.68	16.5854	64.2275	22	0	55	28	35	0	1	1	922
2	1	9.46749	2.6697	43.8793	120	92	3.60197	59286.6	9.68	16.565	64.6029	22	0	55	28	35	0	1	1	922
1	2	18.757	1.70079	22.1586	98	85	3.37129	32550.4	95.99	18.0053	59.4153	46	0	56	24	36.5	1	0	0	894
1	2	9.74401	2.80352	48.8906	102	90	2.32366	24839.9	97.73	18.0053	59.4153	46	0	56	24	36.5	1	1	0	894
2	2	18.757	1.73246	14.1144	103	83	2.29767	36185.3	27.56	17.8694	58.7556	46	0	56	24	36.5	1	0	0	894
2	2	9.74401	2.80352	48.8906	102	75	2.32366	24839.9	97.73	17.8694	58.7556	46	0	56	24	36.5	1	1	0	894
1	1	18.2587	1.50024	27.7408	78	68	3.05023	49289.7	87.87	16.8533	52.0315	28	0	54	28	48	1	0	1	801
1	1	9.24298	2.35838	55.3566	75	72	3.42988	49289.7	88.92	16.8533	52.0315	28	0	54	28	48	1	1	1	801
2	1	18.2724	1.50024	27.7408	97	61	3.05023	49289.7	87.87	16.8533	52.0315	28	0	54	28	48	1	0	1	801
2	1	9.24298	2.35838	55.3566	60	62	3.42988	49289.7	88.92	16.8533	52.0315	28	0	54	28	48	1	1	1	801
1	2	20.7529	1.07547	4.1334	101	99	1.74404	30043	20.84	16.5887	70.4942	20	0	57	21	22	0	0	0	507
1	2	10.9103	2.77562	7.5755	109	101	2.9697	30570.6	10.15	16.5887	70.4942	20	0	57	21	22	0	1	0	507
2	2	20.7858	1.07547	4.1334	119	121	1.74404	30043	20.84	16.5887	70.4942	20	0	57	21	22	0	0	0	507
2	2	10.9103	2.77562	7.5755	99	94	2.9697	30570.6	10.15	16.5887	70.4942	20	0	57	21	22	0	1	0	507
1	3	10.1054	2.70764	39.5546	58	64	3.03569	34377.1	47.33	16.93	69.8278	25	1	50	16	22	1	1	0	379
2	3	10.1054	2.70764	39.5546	77	63	3.03569	34377.1	47.33	16.9644	70.1247	25	1	50	16	22	1	1	0	379
1	2	9.01574	2.49717	36.401	101	106	2.71306	54629.9	64.75	17.3764	70.2972	36	0	57	24	42.5	1	1	1	372
2	2	9.01574	2.49717	36.401	90	74	2.71306	54629.9	64.75	17.3764	70.2972	36	0	57	24	42.5	1	1	0	372
1	7	10.2341	2.86178	25.4309	122	124	4.1085	71040.3	109.7	16.9375	58.2904	25	0	56	29	21	0	1	0	360
2	7	19.0308	1.71544	14.0094	129	123	3.64087	95548	101.01	16.9375	58.2904	25	0	56	29	21	0	0	0	360
2	7	10.2341	2.86178	25.4309	119	114	4.1085	71040.3	109.7	16.9375	58.2904	25	0	56	29	21	0	1	0	360
1	1	10.7625	2.56129	115.317	113	113	4.54687	95436.4	839.25	17.1506	61.7106	20	0	56	27	31	0	1	0	904
2	1	10.7625	2.56129	115.317	106	111	4.54687	95436.4	839.25	17.1506	61.7106	20	0	56	27	31	0	1	0	904
1	2	10.7324	2.44081	30.1776	94	87	2.51685	34179.9	15.84	17.3642	74.2225	20	0	53	26	29	1	1	1	740
2	2	10.7324	2.44081	30.1776	99	86	2.51685	34179.9	15.84	17.3642	74.2225	20	0	53	26	29	1	1	0	740
1	7	10.8392	2.28547	3.51975	94	66	3.17657	66148.6	17.8	17.3396	71.6733	21	0	52	22	36	1	1	0	668
2	7	10.8392	2.28547	3.51975	79	95	3.17657	66148.6	17.8	17.3396	71.6733	21	0	52	22	36	1	1	0	668
1	1	17.9877	1.42338	11.1398	136	102	3.94132	67199.4	35.41	18.3875	58.1402	17	0	56	28	26	0	0	1	526
1	1	9.32512	2.55857	21.5738	114	104	4.50228	67199.4	32.91	18.3875	58.1402	17	0	56	28	26	0	1	1	526
2	1	17.9877	1.42338	11.1398	108	85	3.94132	67199.4	35.41	18.3875	58.1402	17	0	56	28	26	0	0	0	526
2	1	9.32512	2.55857	21.5738	93	93	4.50228	67199.4	32.91	18.3875	58.1402	17	0	56	28	26	0	1	0	526
1	2	18.3244	1.86152	6.5934	96	92	2.05468	27965.3	35.97	18.205	61.8854	23	0	52	29	34	1	0	1	7
1	2	9.0705	2.73419	13.4782	88	71	2.41969	27965.3	33.44	18.205	61.8854	23	0	52	29	34	1	1	1	7
2	2	18.1711	1.83643	6.5934	85	104	2.07427	27965.3	35.97	18.205	61.8854	23	0	52	29	34	1	0	0	7
2	2	9.0705	2.73419	13.4782	95	98	2.41969	27965.3	33.44	18.205	61.8854	23	0	52	29	34	1	1	0	7
1	3	10.8994	2.51274	43.2841	95	114	3.00701	68217.1	50.94	17.2783	60.5467	53	0	25	23	34	1	1	1	624
2	3	10.8994	2.51274	43.2841	87	108	3.00701	68217.1	50.94	17.2783	60.5467	53	0	25	23	34	1	1	0	624
1	2	10.5982	2.7394	33.6123	90	117	2.37227	26489.1	110.81	18.3358	60.8708	31	0	58	23	32	0	1	1	662
2	2	10.5982	2.7394	33.6123	102	112	2.37227	26489.1	110.81	18.3358	60.8708	31	0	58	23	32	0	1	0	662
1	2	9.02122	2.76286	9.1972	92	84	2.99363	20744.5	23.74	16.625	69.9583	33	0	54	21	35	1	1	1	9
2	2	9.02122	2.76286	9.1972	84	102	2.99363	20744.5	23.74	16.625	69.9583	33	0	54	21	35	1	1	1	9
1	2	9.11431	2.531	23.1558	95	102	2.28997	29197.1	54.22	18.3294	60.3861	46	0	56	25	40.5	1	1	1	751
2	2	9.11431	2.531	23.1558	108	100	2.28997	29197.1	54.22	18.3294	60.3861	46	0	56	25	40.5	1	1	1	751
1	7	20.5476	1.98444	34.1198	88	100	2.67654	37505.3	339.9	16.8712	67.9042	17	0	46	10	36	0	0	1	899
1	7	10.6804	2.70003	47.794	94	90	3.00614	51612.6	39.28	16.8712	67.9042	17	0	46	10	36	0	1	1	899
2	7	10.6804	2.70003	47.794	85	97	3.00614	51612.6	39.28	16.8712	67.9042	17	0	46	10	36	0	1	0	899
1	3	9.10609	2.7338	23.0637	123	103	3.16783	55411.3	46.43	16.6546	70.1071	21	0	56	26	53	1	1	0	100
2	3	9.10609	2.7338	23.0637	120	105	3.16783	55411.3	46.43	16.6921	69.8708	21	0	56	26	53	1	1	0	100
2	2	9.8152	2.70207	30.7386	82	90	2.61909	29866.9	77.08	18.1381	60.8317	28	0	46	21	43	1	1	0	376
1	7	10.4038	2.72175	31.3809	66	82	2.01507	18541.7	79.47	18.4658	60.0325	72	0			42	1	1	0	404
2	7	10.4038	2.72175	31.3809	83	95	2.01507	18541.7	79.47	18.4658	60.0325	72	0			42	1	1	0	404
1	2	9.08693	2.3943	70.6586	81	78	2.68575	24860	371.26	18.1504	57.4054	28	0			41.5	1	1	1	670
2	2	9.08693	2.3943	70.6586	84	96	2.68575	24860	371.26	18.1504	57.4054	28	0			41.5	1	1	1	670
1	1	18.1383	1.26008	0.1669	110	117	5.3226	102904	0.28	18.12	54.1783	18	0	56	29	17	0	0	1	180
1	1	9.60438	2.08238	0.3157	103	116	5.55905	102904	0.26	18.12	54.1783	18	0	56	29	17	0	1	1	180
2	1	18.1218	1.26008	0.1669	122	106	5.3226	102904	0.28	16.8875	59.8475	18	0	56	29	17	0	0	1	180
2	1	9.60438	2.08238	0.3157	126	113	5.55905	102904	0.26	16.8875	59.8475	18	0	56	29	17	0	1	1	180
1	2	9.27584	2.69858	12.2994	120	106	3.50805	55972.5	40.5	18.7683	58.0667	27	0	52	28	48	1	1	1	548
2	2	9.27584	2.69858	12.2994	126	126	3.50805	55972.5	40.5	18.7683	58.0667	27	0	52	28	48	1	1	1	548
1	3	9.74401	2.5412	17.8725	118	102	3.04115	38193.1	38.23	18.0106	66.4403	26	0	56	28	26	1	1	1	234
2	3	9.74401	2.5412	17.8725	112	94	3.04115	38193.1	38.23	18.0106	66.4403	26	0	56	28	26	1	1	1	234
1	3	18.245	1.5771	13.701	87	102	2.54946	44917.4	69.4	17.824	59.3629	39	0	56	28	23	0	0	1	544
1	3	9.09788	2.40878	25.7494	82	96	2.9902	44917.4	64.5	17.824	59.3629	39	0	56	28	23	0	1	1	544
2	3	9.09788	2.40878	25.7494	104	99	2.9902	44917.4	64.5	17.824	59.3629	39	0	56	28	23	0	1	0	544
1	1	9.72758	2.54985	7.3568	110	100	5.59311	184858	4.21	17.7833	59.0075	19	0	56	28	28	0	1	1	779
2	1	9.72758	2.54985	7.3568	129	144	5.59311	184858	4.21	17.7833	59.0075	19	0	56	28	28	0	1	1	779
1	7	9.23203	2.50738	45.9786	141	126	2.29636	43056.5	36.52	17.2647	69.9394	24		56	30	26.5	0	1	0	539
2	7	9.23203	2.50738	45.9786	136	93	2.29636	43056.5	36.52	17.2647	69.9394	24		56	30	26.5	0	1	0	539
1	2	9.59343	2.78474	26.9586	76	67	2.52348	30504.2	26.95	18.0304	58.1592	25	0	55	27	22	0	1	1	202
2	2	9.59343	2.78474	26.9586	72	91	2.52348	30504.2	26.95	18.0304	58.1592	25	0	55	27	22	0	1	1	202
1	1	9.23751	2.6605	33.4106	95	80	4.02691	67718.7	25.09	18.0846	60.6804	18	0	56	26	29	0	1	1	493
2	1	9.23751	2.6605	33.4106	107	83	4.02691	67718.7	25.09	18.0846	60.6804	18	0	56	26	29	0	1	0	493
1	2	9.10335	2.65851	15.1135	86	93	4.09673	33170	49.44	18.0647	60.055	23	0	54	27	26	1	1	1	721
2	2	9.10335	2.65851	15.1135	73	82	4.09673	33170	49.44	18.0962	58.8062	23	0	54	27	26	1	1	0	721
1	1	9.29227	2.64015	25.5884	120	136	2.66466	40980.8	11.13	18.59	61.08	23	0	55	24	40	0	1	1	349
2	1	9.29227	2.64015	25.5884	112	146	2.66466	40980.8	11.13	18.59	61.08	23	0	55	24	40	0	1	1	349
1	1	9.09514	2.43163	21.9611	104	84	3.05775	75878.9	126.1	16.3935	68.9492	22	0	55	26	27	0	1	1	343
2	1	9.09514	2.43163	21.9611	128	98	3.05775	75878.9	126.1	16.3723	69.0515	22	0	55	26	27	0	1	0	343
1	1	9.30048	2.36336	16.2026	90	121	4.74271	96074.6	5.62	18.0908	59.8453	17	0	52	23	37	0	1	1	151
2	1	9.30048	2.36336	16.2026	124	99	4.74271	96074.6	5.62	18.0908	59.8453	17	0	52	23	37	0	1	1	151
1	1	10.653	2.83565	30.2626	108	104	2.6918	45709.6	91.19	16.7608	62.3925	21	0	55	27	41	0	1	1	494
2	1	10.653	2.83565	30.2626	77	87	2.6918	45709.6	91.19	16.7608	62.3925	21	0	55	27	41	0	1	1	494
1	3	10.3381	2.18908	11.8244	98	103	2.76641	29082.7	85.53	17.2397	55.0367	23	0	55	26	28	0	1	1	226
2	3	10.3381	2.18908	11.8244	111	123	2.76641	29082.7	85.53	17.2397	55.0367	23	0	55	26	28	0	1	1	226
1	3	18.1246	1.3404	5.3909	98	100	2.55252	33985.3	40.76	17.6919	52.4047	45	0	51	20	31	0	0	0	286
1	3	9.13347	2.16964	10.8636	92	92	2.80752	33985.3	37.88	17.6919	52.4047	45	0	51	20	31	0	1	0	286
2	3	18.1711	1.3561	5.3909	100	73	2.55153	33985.3	40.76	17.7086	52.5961	45	0	51	20	31	0	0	0	286
2	3	9.13347	2.16964	10.8636	117	103	2.80752	33985.3	37.88	17.7086	52.5961	45	0	51	20	31	0	1	0	286
1	2	19.321	1.76982	10.2989	102	102	2.28234	27711.2	9.1	18.1094	62.9402	17	0	56	23	26	1	0	0	831
1	2	10.6585	2.77544	20.5594	108	101	2.62388	27711.2	8.45	18.1094	62.9402	17	0	56	23	26	1	1	0	831
2	2	19.321	1.76982	10.2989	104	103	2.28234	27711.2	9.1	18.1094	62.9402	17	0	56	23	26	1	0	0	831
2	2	10.6585	2.77544	20.5594	103	100	2.62388	27711.2	8.45	18.1094	62.9402	17	0	56	23	26	1	1	0	831
1	2	9.54689	2.72543	36.587	95	105	1.77248	25451.6	72.85	17.9763	63.79	45	0	55	27	40	1	1	1	823
2	2	9.54689	2.72543	36.587	85	83	1.77248	25451.6	72.85	17.9763	63.79	45	0	55	27	40	1	1	1	823
1	2	18.9788	2.02332	6.66235	93	115	1.87979	20027.1	35.86	18.745	60.6278	20	0	46	24	41.5	1	0	0	987
1	2	9.24572	2.72271	104.1	98	107	3.41808	39438.6	899.19	18.745	60.6278	20	0	46	24	41.5	1	1	0	987
2	2	18.9377	1.99966	6.66235	96	118	1.89679	20027.1	35.86	18.745	60.6278	20	0	46	24	41.5	1	0	0	987
2	2	9.24572	2.72271	104.1	95	113	3.41808	39438.6	899.19	18.745	60.6278	20	0	46	24	41.5	1	1	0	987
1	2	9.13347	2.72656	20.979	117	108	3.95814	33170	52.91	17.8061	58.6197	36	0	55	24	35	1	1	1	106
2	2	9.13347	2.72656	20.979	127	94	3.95814	33170	52.91	17.8061	58.6197	36	0	55	24	35	1	1	0	106
1	1	9.0705	2.68958	15.0102	141	107	4.69814	96839.6	101.55	18.4728	59.5331	25	0	56	27	26	0	1	1	586
2	1	9.0705	2.68958	15.0102	124	99	4.69814	96839.6	101.55	18.4728	59.5331	25	0	56	27	26	0	1	1	586
1	3	9.80151	2.75698	43.2728	91	112	2.41067	20921.1	63.77	17.3642	67.6892	32	0	67	25	35	1	1	1	786
2	3	9.80151	2.75698	43.2728	82	99	2.41067	20921.1	63.77	17.3527	67.6513	32	0	67	25	35	1	1	1	786
1	1	9.54962	2.61794	44.053	127	123	4.40676	81762.1	53.46	16.7846	63.7319	19	0	56	24	19.5	0	1	0	59
2	1	9.54962	2.61794	44.053	155	134	4.40676	81762.1	53.46	16.7846	63.7319	19	0	56	24	19.5	0	1	0	59
1	1	18.1273	1.73109	18.6166	124	116	2.73697	38542	46.68	18.2944	60.8864	26	0	57	30	41	0	0	0	257
1	1	9.4757	2.66621	37.5129	123	121	3.04516	38542	43.38	18.2944	60.8864	26	0	57	30	41	0	1	0	257
2	1	18.0698	1.73109	18.6166	123	121	2.73697	38542	46.68	18.2944	60.8864	26	0	57	30	41	0	0	0	257
2	1	9.4757	2.66621	37.5129	121	124	3.04516	38542	43.38	18.2944	60.8864	26	0	57	30	41	0	1	0	257
1	2	18.0616	1.72947	19.8346	116	118	2.15846	27617.3	75.02	18.1278	61.235	41				33	1	0	1	702
1	2	9.59069	2.71263	39.5371	120	128	2.47564	27617.3	69.72	18.1278	61.235	41				33	1	1	1	702
2	2	18.0397	1.72947	19.8346	120	120	2.15846	27617.3	75.02	18.1667	61.1731	41				33	1	0	1	702
2	2	9.59069	2.71263	39.5371	118	119	2.47564	27617.3	69.72	18.1667	61.1731	41				33	1	1	1	702
1	3	9.3963	2.71049	26.9917	103	79	2.65091	27711.2	91.25	18.061	55.06	32	1	51	13	26	0	1	0	396
2	3	9.3963	2.71049	26.9917	105	109	2.65091	27711.2	91.25	18.061	55.06	32	1	51	13	26	0	1	0	396
1	4	10.8364	2.08443	11.967	118	107	3.64115	53260	52.64	17.9962	55.8775	25	0	54	28	27	0	1	1	352
2	4	10.8364	2.08443	11.967	90	93	3.64115	53260	52.64	17.9962	55.8775	25	0	54	28	27	0	1	0	352
1	1	18.1793	1.74876	17.4334	124	130	2.68085	36212.2	100.44	18.0317	60.4056	25	0	56	28	37.5	0	0	1	179
1	1	9.08145	2.49489	32.9275	130	145	3.15514	36212.2	101.32	18.0317	60.4056	25	0	56	28	37.5	0	1	1	179
2	1	18.0835	1.73163	17.4334	141	124	2.68968	36212.2	100.44	18.0317	60.4056	25	0	56	28	37.5	0	0	0	179
2	1	9.08145	2.49489	32.9275	143	141	3.15514	36212.2	101.32	18.0317	60.4056	25	0	56	28	37.5	0	1	0	179
1	2	18.2533	1.76096	9.5589	81	97	3.01221	59778.3	8.94	17.9744	61.0158	27	0	52	24	37	1	0	1	357
1	2	9.09788	2.75162	32.7388	85	89	2.56062	28631.9	12.3	17.9744	61.0158	27	0	52	24	37	1	1	1	357
2	2	18.245	1.76096	9.5589	76	98	3.01221	59778.3	8.94	18.0752	60.6306	27	0	52	24	37	1	0	1	357
2	2	9.09788	2.75162	32.7388	85	100	2.56062	28631.9	12.3	18.0752	60.6306	27	0	52	24	37	1	1	1	357
1	1	9.03491	2.48999	12.0332	89	95	4.14536	61817.1	38.05	18.415	57.5019	17	0	51	20	31	0	1	1	314
2	1	9.03491	2.48999	12.0332	110	97	4.14536	61817.1	38.05	18.5871	57.7925	17	0	51	20	31	0	1	0	314
1	7	10.3682	2.28546	149.233	110	85	3.51244	45365.5	655.14	17.0123	54.4363	41	0	55	22	26	1	1	1	190
2	7	18.8446	1.41637	74.5849	92	108	3.07672	45365.5	666.97	17.0123	54.4363	41	0	55	22	26	1	0	1	190
2	7	10.3682	2.28546	149.233	111	101	3.51244	45365.5	655.14	17.0123	54.4363	41	0	55	22	26	1	1	1	190
1	2	18.7953	1.69165	22.7188	97	117	2.52196	27665.6	38.79	18.3056	57.3979	51		49	23	32	1	0	1	918
1	2	10.2505	2.99638	9.41035	112	126	3.10818	28953.6	18.78	18.3056	57.3979	51		49	23	32	1	1	1	918
2	2	18.7351	1.70093	22.7188	111	121	2.52083	27665.6	38.79	18.3056	57.3979	51		49	23	32	1	0	1	918
2	2	10.2505	2.99638	9.41035	118	125	3.10818	28953.6	18.78	18.3056	57.3979	51		49	23	32	1	1	1	918
1	4	18.7077	1.45548	5.61935	109	103	3.23499	37373.9	10.51	17.3306	55.1917	17	0	50	23	37	0	0	1	882
1	4	9.39083	2.24589	10.9158	91	92	3.66463	37373.9	9.76	17.3306	55.1917	17	0	50	23	37	0	1	1	882
2	4	18.6201	1.44439	5.61935	113	102	3.2453	37373.9	10.51	17.3306	55.1917	17	0	50	23	37	0	0	1	882
2	4	9.39083	2.24589	10.9158	79	92	3.66463	37373.9	9.76	17.3306	55.1917	17	0	50	23	37	0	1	1	882
1	1	9.44559	2.30432	22.6895	120	118	4.34942	58745.7	9.47	17.7156	60.4125	31	0	54	26	31	0	1	1	778
2	1	9.44559	2.30432	22.6895	128	108	4.34942	58745.7	9.47	17.7156	60.4125	31	0	54	26	31	0	1	1	778
1	1	18.7023	1.51692	11.4522	115	116	3.60137	95539.2	8.63	17.6694	54.5602	20	0	57	30	20	0	0	1	523
1	1	9.02669	2.19276	13.4239	114	98	4.43375	72883.5	29.1	17.6694	54.5602	20	0	57	30	20	0	1	1	523
2	1	18.5818	1.50865	11.4522	130	108	3.61298	95539.2	8.63	17.749	54.0935	20	0	57	30	20	0	0	0	523
2	1	9.02669	2.19276	13.4239	141	114	4.43375	72883.5	29.1	17.749	54.0935	20	0	57	30	20	0	1	0	523
1	3	9.52225	2.44603	50.5765	100	101	2.16136	52647.4	47.71	17.6817	72.9858	24	1	52	11	32	1	1	1	498
2	3	9.52225	2.44603	50.5765	77	71	2.16136	52647.4	47.71	17.6817	72.9858	24	1	52	11	32	1	1	1	498
1	2	10.3737	2.37328	59.119	106	58	2.68136	29393.6	140.01	17.5167	57.8421	35		57	28	38.5	1	1	0	595
2	2	10.3737	2.37328	59.119	98	84	2.68136	29393.6	140.01	17.8786	57.2056	35		57	28	38.5	1	1	0	595
1	7	9.25394	2.68171	32.0843	100	102	2.10131	20431.5	577.59	18.3517	60.229	44	0	50	22	42	1	1	0	953
2	7	18.2724	1.88117	16.6626	89	108	1.98228	20431.5	553.19	18.3517	60.229	44	0	50	22	42	1	0	0	953
2	7	9.25394	2.68171	32.0843	111	101	2.10131	20431.5	577.59	18.3517	60.229	44	0	50	22	42	1	1	0	953
1	2	18.1246	1.77517	10.5907	105	117	2.45115	27393.3	95.74	18.0439	63.0931	38	0	58	25	43	1	0	0	181
1	2	9.63723	2.70308	21.0208	69	100	2.75792	27393.3	88.99	18.0439	63.0931	38	0	58	25	43	1	1	0	181
2	2	18.3491	1.83952	10.5907	95	115	2.46922	27393.3	95.74	18.0439	63.0931	38	0	58	25	43	1	0	0	181
2	2	9.63723	2.70308	21.0208	90	123	2.75792	27393.3	88.99	18.0439	63.0931	38	0	58	25	43	1	1	0	181
1	2	9.77687	2.7137	32.8843	94	96	2.31299	26489.1	96.97	18.4822	59.6033	27		57	20	27	1	1	1	330
2	2	9.77687	2.7137	32.8843	77	89	2.31299	26489.1	96.97	18.4822	59.6033	27		57	20	27	1	1	1	330
1	2	18.13	1.89791	11.5059	98	103	1.94473	20127.4	13.69	18.0046	63.1485	50	0			30.5	1	0	0	750
1	2	9.0924	2.69946	22.7229	98	111	2.3341	20127.4	12.72	18.0046	63.1485	50	0			30.5	1	1	0	750
2	2	18.0999	1.89791	11.5059	95	97	1.94473	20127.4	13.69	18.0046	63.1485	50	0			30.5	1	0	0	750
2	2	9.0924	2.69946	22.7229	104	91	2.3341	20127.4	12.72	18.0046	63.1485	50	0			30.5	1	1	0	750
1	3	9.20739	2.6907	15.9121	112	93	2.49588	18736.8	96.04	18.885	60.785	24	0			17	0	1	0	361
2	3	9.20739	2.6907	15.9121	115	96	2.49588	18736.8	96.04	18.885	60.785	24	0			17	0	1	0	361
1	3	9.97399	2.66462	44.6994	75	59	2.50692	24544.8	105.6	16.7467	69.2512	59	0	51	21	53	1	1	0	22
2	3	9.97399	2.66462	44.6994	88	82	2.50692	24544.8	105.6	16.7467	69.2512	59	0	51	21	53	1	1	0	22
1	7	19.3238	0.926062	1.3525	94	85	4.00911	58827.5	0.51	13.0804	73.1188	22	0	67	27	35	0	0	1	115
2	7	19.3457	0.926062	1.3525	84	93	4.00911	58827.5	0.51	13.0921	71.3804	22	0	67	27	35	0	0	1	115
2	3	19.5264	1.80974	22.4147	103	85	2.91235	32507.8	64.45	17.2504	69.6025	51	0	71	30	49	0	0	0	664
1	1	20.4107	1.79338	7.23405	128	97	2.45289	117703	42.01	16.5862	66.9971	23	0	76	30	22	0	0	1	864
2	1	19.7974	1.65668	7.23405	107	97	2.49218	117703	42.01	16.5862	66.9971	23	0	76	30	22	0	0	1	864
1	1	19.2005	1.69414	3.2209	124	127	5.11356	157974	2.62	17.9229	60.1562	17	0	69	30	17	0	0	1	209
2	1	19.1978	1.69414	3.2209	131	81	5.11356	157974	2.62	17.9229	60.1562	17	0	69	30	17	0	0	0	209
1	2	20.7666	1.80672	6.1616	115	85	3.46325	91066	17.65	17.2825	62.3867	26	0	69	32	22	0	0	1	980
2	2	20.7666	1.80672	6.1616	125	104	3.46325	91066	17.65	17.28	63.2488	26	0	69	32	22	0	0	1	980
1	1	19.1211	1.59078	7.6996	116	108	4.58956	112735	4.9	16.8125	48.9725	33	0	75	31	20	0	0	0	127
2	1	19.1211	1.59078	7.6996	112	124	4.58956	112735	4.9	16.8125	48.9725	33	0	75	31	20	0	0	0	127
1	7	19.2334	1.78502	18.8371	125	103	3.008	58387.8	83.98	17.3708	69.4275	27		63	12	34	1	0	1	690
2	7	19.2334	1.78502	18.8371	95	85	3.008	58387.8	83.98	17.3708	69.4275	27		63	12	34	1	0	1	690
1	2	19.206	1.73125	7.47985	77	93	2.97493	27437.2	52.3	18.1292	60.7237	19	0	60	24	34	0	0	1	862
1	2	19.5127	1.74684	10.0863	84	101	2.19452	33455.1	13.51	18.54	60.2092	32	0			37	1	0	1	120
2	2	19.603	1.70168	10.0863	89	92	2.18166	33455.1	13.51	18.54	60.2092	32	0			37	1	0	1	120
1	3	20.2628	1.84745	19.8853	100	106	2.40848	54200	111.33	16.1746	66.9354	28	1	70	26	30	1	0	1	777
2	3	19.2252	1.78504	19.8853	97	127	2.47586	54200	111.33	16.1746	66.9354	28	1	70	26	30	1	0	0	777
1	7	19.9316	1.46782	2.2855	107	116	3.36413	49682.5	27.24	17.6825	67.5437		0	68	25	27	1	0	1	270
2	7	19.885	1.4507	2.2855	103	101	3.39014	49682.5	27.24	17.6825	67.5437		0	68	25	27	1	0	0	270
1	2	20.4709	1.83701	15.1699	104	96	2.13345	49731.7	32.41	17.5025	68.3383	21	0	73	27	35	1	0	0	227
2	2	20.564	1.88326	15.1699	105	104	2.10267	49731.7	32.41	17.5025	68.3383	21	0	73	27	35	1	0	0	227
2	2	19.1157	1.43564	9.4359	101	118	2.67282	52640.2	44.2	18.9854	55.5654	33	0	67	22	32	0	0	1	980
1	7	19.488	1.71943	25.7372	128	120	2.77812	48738.2	95.96	16.9108	69.7313	21	0	62	25	25	0	0	1	183
2	7	19.4908	1.71943	25.7372	117	123	2.77812	48738.2	95.96	16.9108	69.7313	21	0	62	25	25	0	0	1	183
2	1	19.9863	1.89065	8.22395	77	98	2.54068	70406.4	46.86	17.7617	57.0242	25	0	75	30	19	0	0	0	296
1	2	19.2608	1.72849	12.7503	106	102	2.56473	45709.6	11.59	16.1454	64.4296	48	0	65	26	34	0	0	0	20
2	2	19.2964	1.72739	12.7503	111	102	2.5477	45709.6	11.59	16.1454	64.4296	48	0	65	26	34	0	0	0	20
1	2	19.9589	1.7332	19.1676	118	114	2.22403	35185.3	61.85	17.5087	62.3592	24	0	68	27	22	1	0	0	342
2	2	19.9863	1.7332	19.1676	111	97	2.22403	35185.3	61.85	17.5087	62.3592	24	0	68	27	22	1	0	0	342
1	1	19.1759	1.67881	23.0053	94	108	2.79209	41956.8	88.11	18.3629	56.4838	23	0	69	28	19	0	0	0	928
2	1	19.165	1.67881	23.0053	130	110	2.79209	41956.8	88.11	18.3629	56.4838	23	0	69	28	19	0	0	0	928
1	2	20.0657	1.77928	20.7588	91	105	2.71596	11100.6	51.29	17.2058	69.1496	57	0	55	20	38	1	0	1	591
2	2	20.1478	1.7964	20.7588	96	80	2.70355	11100.6	51.29	17.2058	69.1496	57	0	55	20	38	1	0	0	591
1	2	19.6194	1.64833	11.1996	89	101	2.7357	32964.6	9.07	18.1775	56.6875	19	0	76	29	29	1	0	1	644
2	2	19.373	1.56809	11.1996	111	94	2.76947	32964.6	9.07	18.1775	56.6875	19	0	76	29	29	1	0	0	644
1	2	19.9589	1.79511	15.3026	104	116	2.44663	29496.8	18.78	17.5067	57.5917	28				39	1	0	0	469
1	1	19.384	1.52018	5.7099	127	117	4.94721	116681	9.59	16.7971	48.4396	26	0	75	31	30	0	0	1	172
2	1	19.2635	1.52366	5.7099	111	114	4.95147	116681	9.59	16.7971	48.4396	26	0	75	31	30	0	0	1	172
1	1	19.6057	1.72983	5.0564	121	96	3.03096	69700.9	73.68	16.2133	67.6271	19	0	73	25	20	0	0	1	623
2	1	19.6386	1.76342	8.4212	120	110	2.96269	75878.9	83.51	16.2133	67.6271	19	0	73	25	20	0	0	0	623
1	1	19.7344	1.60302	9.02185	127	122	3.8984	81989.1	4.85	17.1288	59.3292	29	0	76	30	29	0	0	1	824
2	1	19.2088	1.48536	9.02185	121	115	3.91624	81989.1	4.85	17.1604	59.0063	29	0	76	30	29	0	0	0	824
1	1	18.9815	1.66145	5.4528	128	117	1.86224	102765	32.63	15.8071	66.3004	22	0	74	29	23	0	0	0	378
2	1	18.9815	1.66145	5.4528	131	102	1.86224	102765	32.63	15.8071	66.3004	22	0	74	29	23	0	0	0	378
1	1	19.05	1.38832	9.614	111	91	3.19719	50527	69.72	17.47	54.3579	20		75	30	27	0	0	1	638
1	1	19.1157	1.0715	0.89965	115	118	2.91641	70628	21.55	17.47	49.6442	20	0	73	29	43	0	0	0	654
2	1	19.217	1.11848	0.89965	124	119	2.9145	70628	21.55	17.47	49.6442	20	0	73	29	43	0	0	0	654
1	2	19.2252	1.59975	8.8168	105	100	3.52432	75157.5	68.32	18.4508	55.4542		0	70	26	18	1	0	0	314
2	2	19.0609	1.52612	8.8168	103	98	3.54617	75157.5	68.32	18.4508	55.4542		0	70	26	18	1	0	0	314
1	1	19.1129	1.19198	4.84325	115	92	2.61485	67089	22.84	17.5767	47.8679	27	0	65	23	30	1	0	1	341
1	1	19.5455	1.78503	8.75025	122	109	3.49	65753.7	19.46	17.3637	58.6396	17	0		24	34	1	0	0	585
2	1	19.5455	1.78503	8.75025	118	123	3.49	65753.7	19.46	17.3637	58.6396	17	0		24	34	1	0	0	585
1	1	19.217	1.76561	16.4481	117	123	2.25103	34894.3	127.91	17.8046	52.9392	31	0	75	27	24	1	0	1	223
2	1	19.3374	1.2559	0.24865	113	114	3.88045	85203.6	0.25	17.8046	52.9392	31	0	75	27	24	1	0	0	223
1	7	19.0281	1.71168	92.4721	127	127	2.32099	52194.4	946.25	15.8071	66.3004	28	0	75	31	31	1	0	1	22
2	7	19.0281	1.71168	92.4721	102	112	2.32099	52194.4	946.25	15.8071	66.3004	28	0	75	31	31	1	0	1	22
1	2	19.1567	1.76464	7.9292	105	102	2.54217	31026.7	37.82	18.2958	60.4938	25	0	58	29	32	1	0	1	691
2	2	19.154	1.76464	7.9292	97	95	2.54217	31026.7	37.82	18.2958	60.4938	25	0	58	29	32	1	0	0	691
1	1	18.6721	1.66547	7.759	105	108	3.1664	49791.5	93.11	17.9496	60.4767		0	71	31	30	1	0	1	650
2	1	18.6831	1.66547	7.759	100	97	3.1664	49791.5	93.11	17.8975	58.4008		0	71	31	30	1	0	1	650
1	2	19.5838	1.63859	5.81515	94	80	2.94803	43346	15.88	16.8888	49.9196	23	0	56	25	43	1	0	0	152
2	2	19.5866	1.63859	5.81515	102	91	2.94803	43346	15.88	16.8888	49.9196	23	0	56	25	43	1	0	0	152
1	2	18.7926	1.69895	10.0448	126	120	2.97864	49887.6	45.67	17.9608	58.0583	27	0	67	25	31	0	0	1	700
2	2	18.7926	1.69895	10.0448	127	117	2.97864	49887.6	45.67	17.9608	58.0583	27	0	67	25	31	0	0	0	700
1	2	19.5291	1.74731	24.1932	78	75	2.5424	35337.7	93.14	17.6646	58.6733	31	0	22	49	40	1	0	0	142
2	2	19.5455	1.74731	24.1932	81	71	2.5424	35337.7	93.14	17.6646	58.6733	31	0	22	49	40	1	0	0	142
1	2	19.6934	1.60829	5.92325	93	115	2.92336	38011.5	10.8	18.2263	60.8317	35	0			35	1	0	1	786
2	2	19.6934	1.86212	16.4584	108	87	1.64619	21268.4	108.63	18.2263	60.8317	35	0			35	1	0	0	786
2	2	18.7652	1.71862	12.1498	96	82	2.47358	47399.6	16.68	17.4596	63.0962	34	0	28	57	24	1	0	0	660
1	1	20.5558	1.72553	12.0693	119	91	3.30279	62105	19.53	17.0888	69.4079	20	0	73	27	20	0	0	1	595
2	1	20.5859	1.73492	12.0693	118	104	3.28211	62105	19.53	17.0888	69.4079	20	0	73	27	20	0	0	1	595
1	3	18.0068	1.69853	17.6667	58	82	2.55145	32285.7	128.61	17.0008	62.9658	62	0	62	14	44	1	0	0	976
2	3	18.0096	1.69853	17.6667	67	83	2.55145	32285.7	128.61	17.0008	62.9658	62	0	62	14	44	1	0	0	976
1	1	19.9562	1.90638	8.152	111	90	2.90482	35474.9	54.01	18.3842	60.0021	28	0			25	0	0	0	575
2	1	19.5373	1.7933	8.152	126	118	2.9406	35474.9	54.01	18.3842	60.0021	28	0			25	0	0	1	575
2	2	19.2033	1.51698	67.767	101	94	2.43915	30911.1	591.14	17.1817	50.9479	23	0	57	28	29	1	0	1	681
1	2	18.1684	1.72451	20.3266	91	100	3.19754	46993.1	56.79	17.2058	68.6342	31	0	70	31	50	0	0	1	220
2	2	19.0144	1.89298	20.3266	94	95	3.13759	46993.1	56.79	17.9442	67.6558	31	0	70	31	50	0	0	1	220
1	1	18.026	1.66845	12.5158	129	115	3.01582	65615.2	14.34	17.1438	68.7879	25	0	69	20	21	0	0	1	650
2	1	18.026	1.66845	12.5158	114	111	3.01582	65615.2	14.34	17.1438	68.7879	25	0	69	20	21	0	0	0	650
1	1	19.0472	1.85456	9.67095	110	112	3.55572	68918.7	63.01	18.465	47.7796		0	66	20	35	0	0	1	754
2	1	19.05	1.47411	5.77805	115	113	3.39675	76075.3	9.11	18.8217	46.0308		0	66	20	35	0	0	0	754
1	7	18.037	1.71444	9.0631	111	112	3.75716	41508.8	9.59	18.2963	59.6392	20	0	52	13	27	1	0	1	547
2	7	18.0753	1.62601	12.121	115	102	2.04099	31741.5	140.73	18.3254	59.6863	20	0	52	13	27	1	0	0	547
1	1	18.5572	1.81791	21.0331	83	89	2.21867	51520.6	64.32	17.1129	69.0292	2		75	32	20	1	0	1	668
2	1	18.5462	1.81791	21.0331	75	87	2.21867	51520.6	64.32	17.1129	69.0292	2		75	32	20	1	0	1	668
1	3	18.1875	1.86532	4.5813	94	91	2.35278	25635.6	80.05	16.4358	65.54	25	0	69	23	54	1	0	1	678
2	3	18.2669	1.86807	7.6904	61	59	2.64456	52043.3	13	16.4358	65.54	25	0	69	23	54	1	0	0	678
2	7	18.1629	1.85594	4.5813	98	77	2.38122	25635.6	80.05	18.2071	60.7558	55	0	67	22	43	1	0	0	711
1	7	19.1458	1.62752	3.9368	120	103	2.88419	65427.7	23.87	16.1025	65.9554	18	0	64	25	21	1	0	1	454
2	7	19.1485	1.62752	3.9368	87	104	2.88419	65427.7	23.87	16.1025	65.9554	18	0	64	25	21	1	0	1	454
1	2	18.078	1.76688	22.1293	92	123	2.65812	45498.2	77.07	17.0367	67.4708	47	0	70	30	30	1	0	1	250
2	2	18.0671	1.76688	22.1293	84	95	2.65812	45498.2	77.07	17.0367	67.4708	47	0	70	30	30	1	0	1	250
1	4	18.0862	1.52158	6.14765	135	115	4.30206	112735	8.37	16.3687	47.5092	25	0	72	26	19	0	0	1	450
2	4	18.0479	1.52158	6.14765	134	123	4.30206	112735	8.37	16.4454	46.1817	25	0	72	26	19	0	0	1	450
1	2	18.6475	1.64928	11.5284	83	89	2.89333	35691.8	42.94	16.9942	67.3404	41	0	73	27	22	1	0	0	720
2	2	18.6174	1.6586	12.9537	75	101	2.12382	45547.6	62.57	16.9342	67.5125	41	0	73	27	22	1	0	0	720
1	1	18.3847	1.30846	2.974	123	97	3.94087	75981.7	0.5	17.6508	52.3171	20	0			34	0	0	1	515
2	1	18.4778	1.31305	2.974	113	78	3.89943	75981.7	0.5	17.5908	52.5871	20	0			34	0	0	0	515
1	2	18.3682	1.43219	11.7746	96	116	3.20183	55324.3	5.29	18.3975	66.2321	20	0		25	27	1	0	1	330
2	2	18.3682	1.43219	11.7746	72	114	3.20183	55324.3	5.29	18.3975	66.2321	20	0		25	27	1	0	1	330
1	1	18.5818	0.276832	13.9997	110	117	2.72811	27090.8	220.49	16.9596	69.5796	23	0	74	31	22	0	0	0	27
2	1	18.2752	1.69768	31.6023	113	113	3.00992	71397.6	152.46	16.9596	69.5796	23	0	74	31	22	0	0	0	27
1	3	18.037	1.87186	64.4964	78	79	2.36388	35122.7	1124.01	17.6687	63.4	23	0	69	29	22	1	0	1	423
2	3	18.037	1.87186	64.4964	89	81	2.36388	35122.7	1124.01	17.6687	63.4	23	0	69	29	22	1	0	1	423
1	7	18.2533	1.68555	41.3066	107	118	3.44068	30537.9	228.65	18.0925	60.4546	37	0	57	23	38	1	0	0	402
2	7	18.1875	1.67447	41.3066	108	119	3.44818	30537.9	228.65	18.0925	60.4546	37	0	57	23	38	1	0	0	402
1	7	18.0999	1.55899	8.90625	99	107	4.11586	43214.4	36.04	16.2917	41.055	27	0	71	31	34	0	0	0	111
2	7	18.1246	1.55899	8.90625	92	88	4.11586	43214.4	36.04	16.2917	41.055	27	0	71	31	34	0	0	0	111
1	2	18.6366	2.08314	13.3893	104	87	3.22103	41029.7	13.08	16.8754	58.9129	32				51	1	0	0	562
2	2	18.6393	2.08314	13.3893	106	101	3.22103	41029.7	13.08	16.8754	58.9129	32				51	1	0	0	562
1	2	18.1711	1.90219	33.3018	78	96	2.25298	20512.2	683.35	18.0925	60.0633	35	0	69	29	41	1	0	0	521
2	2	18.1711	1.90219	33.3018	65	93	2.25298	20512.2	683.35	18.0925	60.0633	35	0	69	29	41	1	0	0	521
1	2	18.2094	1.72484	12.2545	78	88	3.84565	47399.6	107.71	18.1683	58.0621	25	0	66	25	28	0	0	1	619
2	2	18.089	1.70313	12.2545	107	113	3.876	47399.6	107.71	18.1683	58.0621	25	0	66	25	28	0	0	1	619
1	3	18.872	1.70705	14.8131	103	88	2.10121	44156.1	81.09	16.0271	66.085	22	0			17	0	0	1	213
2	3	18.8309	1.70705	14.8131	110	107	2.10121	44156.1	81.09	16.0204	66.3713	22	0			17	0	0	0	213
1	1	18.2094	1.73114	15.9489	112	122	3.36818	60628.1	110.3	16.8888	69.5642	18	0			24.9167	0	0	1	230
2	1	18.193	1.73114	15.9489	114	107	3.36818	60628.1	110.3	16.8658	69.4883	18	0			24.9167	0	0	0	230
1	2	18.1191	1.71666	13.1323	100	44	1.96407	24350.9	108.6	16.8996	66.3333	44	0			34	1	0	0	909
2	2	18.1328	1.71666	13.1323	90	83	1.96407	24350.9	108.6	16.8996	66.3333	44	0			34	1	0	0	909
1	1	18.3299	1.85495	30.752	118	121	2.45136	62856.6	81.09	15.8771	66.2854	23	0			33	0	0	1	702
2	1	18.3929	1.8601	30.752	117	117	2.45299	62856.6	81.09	15.8771	66.2854	23	0			33	0	0	1	702
1	1	18.0534	1.88173	10.3438	110	99	3.77424	45934.3	176.57	18.0608	60.3663	33	0			40	0	0	1	274
2	1	18.0507	1.88173	10.3438	128	100	3.77424	45934.3	176.57	18.0608	60.3663	33	0			40	0	0	0	274
1	3	18.0862	1.85713	14.6575	78	90	2.07934	27512.3	2.96	17.3883	69.0567	39	0			39	1	0	1	338
2	3	18.0671	1.85254	14.6575	70	99	2.07928	27512.3	2.96	17.3883	69.0567	39	0			39	1	0	0	338
1	1	18.2396	1.65098	32.1435	87	123	4.52408	103720	161.75	18.0854	60.9488	32	0			26	0	0	1	198
2	1	18.2368	1.65098	32.1435	142	121	4.52408	103720	161.75	18.0854	60.9488	32	0			26	0	0	1	198
1	1	18.1739	1.26781	14.9515	105	99	2.35426	71308.8	91.84	14.7471	48.0475	25	0			45	0	0	1	345
2	1	18.1739	1.26781	14.9515	114	104	2.35426	71308.8	91.84	14.8054	48.0133	25	0			45	0	0	0	345
1	2	18.0753	1.75622	9.1145	90	72	3.25234	31661.8	60.56	18.1129	60.1075	25	0			32	0	0	0	944
2	2	18.0835	1.75622	9.1145	96	102	3.25234	31661.8	60.56	18.1129	60.1075	25	0			32	0	0	0	944
2	1	18.0233	1.14488	1.64555	87	98	2.79514	70628	30.1	17.8467	47.7892	30	0			31	0	0	0	965
1	1	18.1246	1.75464	14.719	128	110	3.63287	53038.6	156.24	17.79	58.9629	22	0			42	0	0	0	232
2	1	18.2423	1.77034	14.719	137	119	3.6196	53038.6	156.24	17.8938	59.0746	22	0			42	0	0	0	232
1	4	17.4757	1.61652	2.61295	116	75	3.50691	81722.8	8.81	18.7167	57.8783	30	0			38	0	0	1	600
2	4	17.4675	1.61652	2.61295	105	104	3.50691	81722.8	8.81	18.7167	57.8783	30	0			38	0	0	1	600
1	3	18.1574	1.76526	5.6828	87	73	2.39964	18585.6	26.36	15.7967	66.2396	28	0			32	0	0	1	72
2	3	18.1465	1.76526	5.6828	82	65	2.39964	18585.6	26.36	15.7967	66.2396	28	0			32	0	0	0	72
1	1	18.8747	1.42414	19.1693	127	131	3.49326	61978.2	13.56	17.2933	51.5067	23	0			29	1	0	1	794
2	1	18.7707	1.39131	19.1693	117	119	3.5014	61978.2	13.56	17.2233	51.4188	23	0			29	1	0	0	794
1	1	18.141	1.82974	11.681	115	107	3.25876	55321.9	38.03	18.01	59.215	24	0			24	0	0	0	78
2	1	18.141	1.82974	11.681	119	123	3.25876	55321.9	38.03	18.01	59.215	24	0			24	0	0	0	78
1	2	19.2663	1.76074	9.8147	87	104	2.71681	39282.2	32.19	17.9683	57.1783	23	0			21	1	0	1	454
2	2	18.3107	1.5684	9.8147	88	123	2.84196	39282.2	32.19	17.9683	57.1783	23	0			21	1	0	0	454
1	2	18.2149	1.75384	12.4511	67	80	1.49195	31114.7	60.67	17.0867	70.3258	32	0			34.6667	1	0	1	148
2	2	18.2149	1.75384	12.4511	82	64	1.49195	31114.7	60.67	16.7917	69.9437	32	0			34.6667	1	0	1	148
1	1	18.3929	1.22698	2.15255	95	117	3.04786	83615.4	0.6	17.5721	47.7054	20	0			38	0	0	1	732
2	1	18.3929	1.22698	2.15255	102	129	3.04786	83615.4	0.6	17.5346	49.3033	20	0			38	0	0	0	732
1	7	18.3847	1.63274	19.9453	120	115	2.76749	51849.9	91.08	16.8004	69.7058	23	0			25	0	0	1	953
2	7	18.3874	1.63274	19.9453	121	125	2.76749	51849.9	91.08	16.8004	69.7058	23	0			25	0	0	1	953
1	3	18.1054	0.854023	1.83775	116	111	2.00703	49924	11.52	16.8883	45.3987	23	0			21	0	0	1	688
2	3	18.245	0.880669	1.83775	99	105	1.98044	49924	11.52	16.8475	45.5187	23	0			21	0	0	1	688
1	7	18.2423	1.74728	7.5735	95	107	2.19791	32090.7	16.08	17.7063	59.3196	41	0			33	0	0	1	133
2	7	18.8693	1.88232	7.5735	110	117	2.21439	32090.7	16.08	17.7063	59.3196	41	0			33	0	0	1	133
1	7	18.0589	1.71609	6.2944	101	85	2.40246	46500.9	16.05	17.1192	70.7725	29	1			37	1	0	0	946
1	7	18.2587	1.50316	26.1003	111	116	2.99798	63681.2	56.25	16.0908	49.3483	28	0			43	0	0	1	544
2	7	18.2587	1.50316	26.1003	106	115	2.99798	63681.2	56.25	16.0908	49.3483	28	0			43	0	0	1	544
1	3	18.6557	2.01676	6.2799	68	83	2.07394	31410.4	54.27	16.37	66.6008	71					0	0	1	167
2	3	18.1437	1.89511	6.2799	69	65	2.16596	31410.4	54.27	16.37	66.6008	71					0	0	0	167
